# Supplementary material for: CuBr/NHPI co-catalyzed aerobic oxidative [3 + 2] cycloaddition-aromatization to access 5,6-dihydro-pyrrolo[2,1-a]isoquinolines
Source: Royal Society of Chemistry journal article supplement (doi:10.1039/d0ob01403f), 2020-01-01
Supplement: d0ob01403f1.pdf [file d0ob01403f1.pdf]

## Supporting Information

### **CuBr/NHPI Co-catalyzed Aerobic Oxidative [3+2] Cycloaddition-Aromatization to Access 5,6-dihydro-pyrrolo[2, 1-*a*]isoquinolines**

Zhiyu Xie,<sup>\*a</sup> Fei Li,<sup>b</sup> Liangfeng Niu,<sup>a</sup> Jincui Zheng,<sup>a</sup> Hongbing Li,<sup>a</sup> Ruijing Han,<sup>b</sup>  
Zhiyu Ju, Shanshan Li,<sup>a</sup> and DandanLi<sup>\*a</sup>

<sup>a</sup> *School of Chemistry and Chemical Engineering, Xuchang University, Xuchang  
461000, Henan, P. R. China.*

<sup>b</sup> *Thyroid and breast surgery, Xuchang Central Hospital, No.30 Huatuo Road,  
Xuchang, Henan 461000, P. R. China.*

*E-mail: zhiyu0823@163.com; dandanli2015@outlook.com.*

#### **Table of Contents**

|                                                                                |               |
|--------------------------------------------------------------------------------|---------------|
| <b><sup>1</sup>H NMR and <sup>13</sup>C NMR spectra of all compounds .....</b> | <b>S2-S48</b> |
|--------------------------------------------------------------------------------|---------------|

# $^1\text{H}$ NMR and $^{13}\text{C}$ NMR

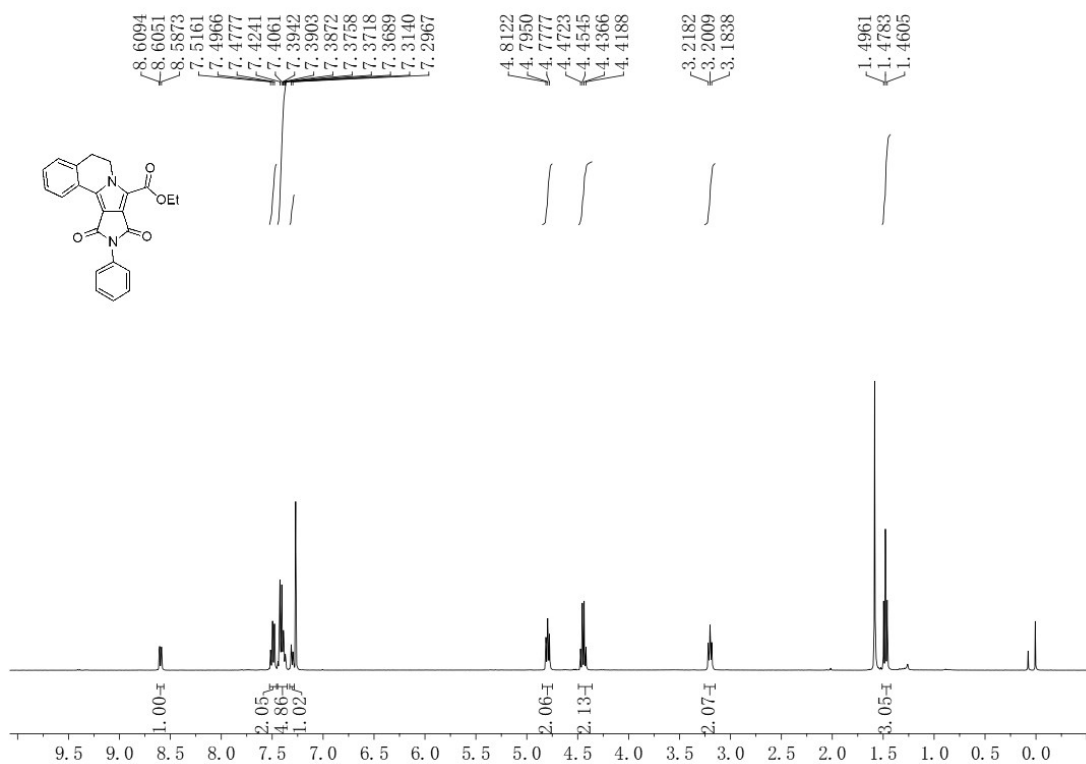

$^1\text{H}$   $^{13}\text{C}$  NMR of **3a**

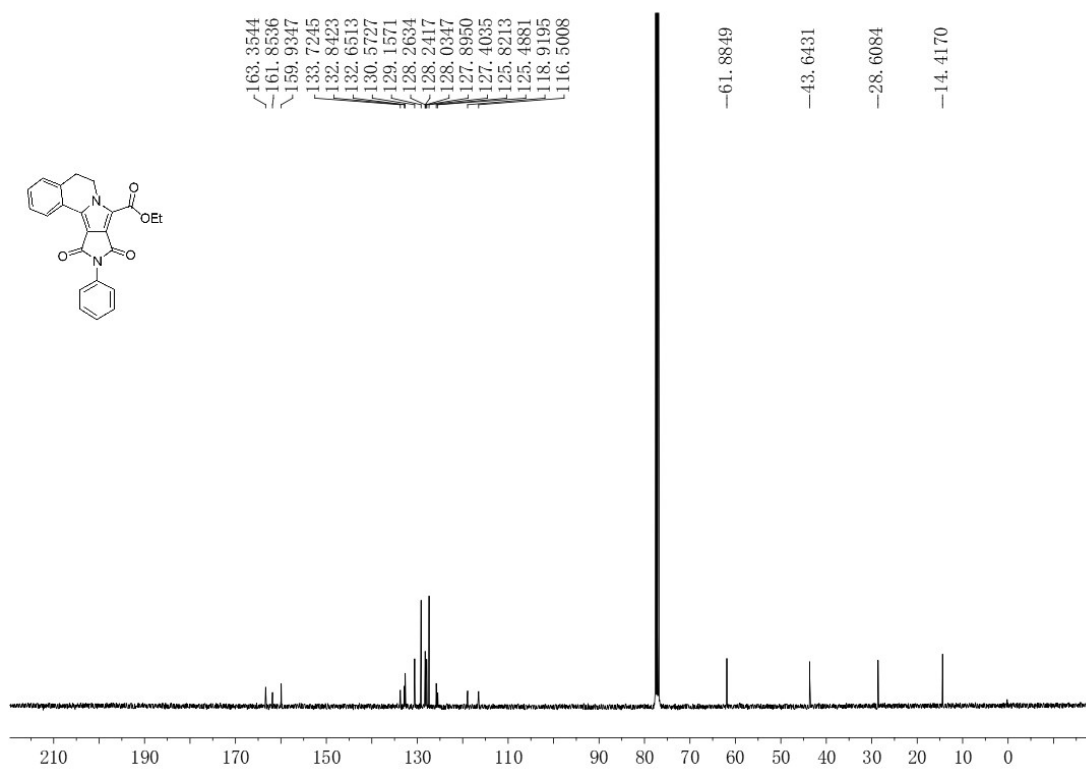

$^{13}\text{C}$  NMR of **3a**

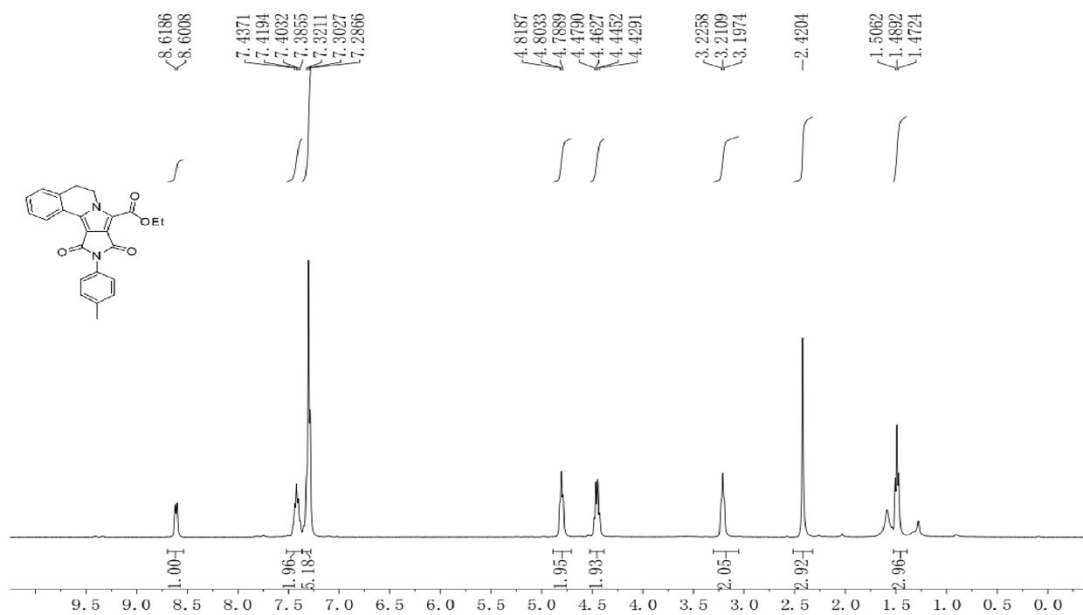

<sup>1</sup>H NMR of **3b**

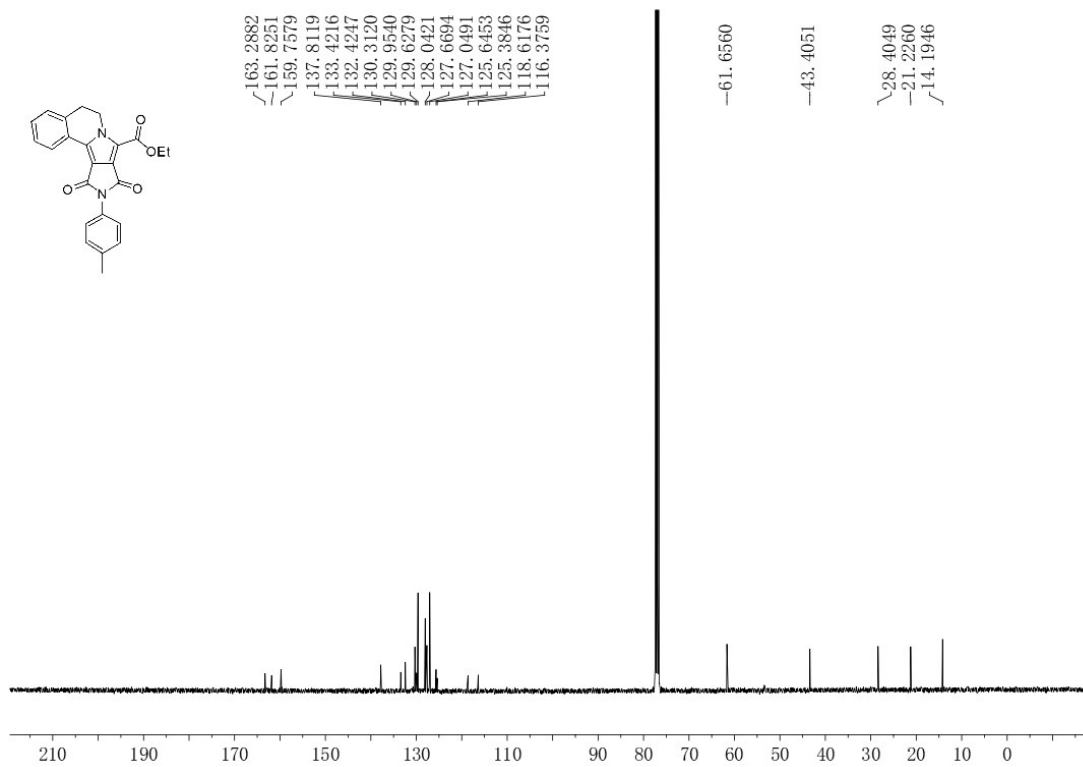

<sup>13</sup>C NMR of **3b**

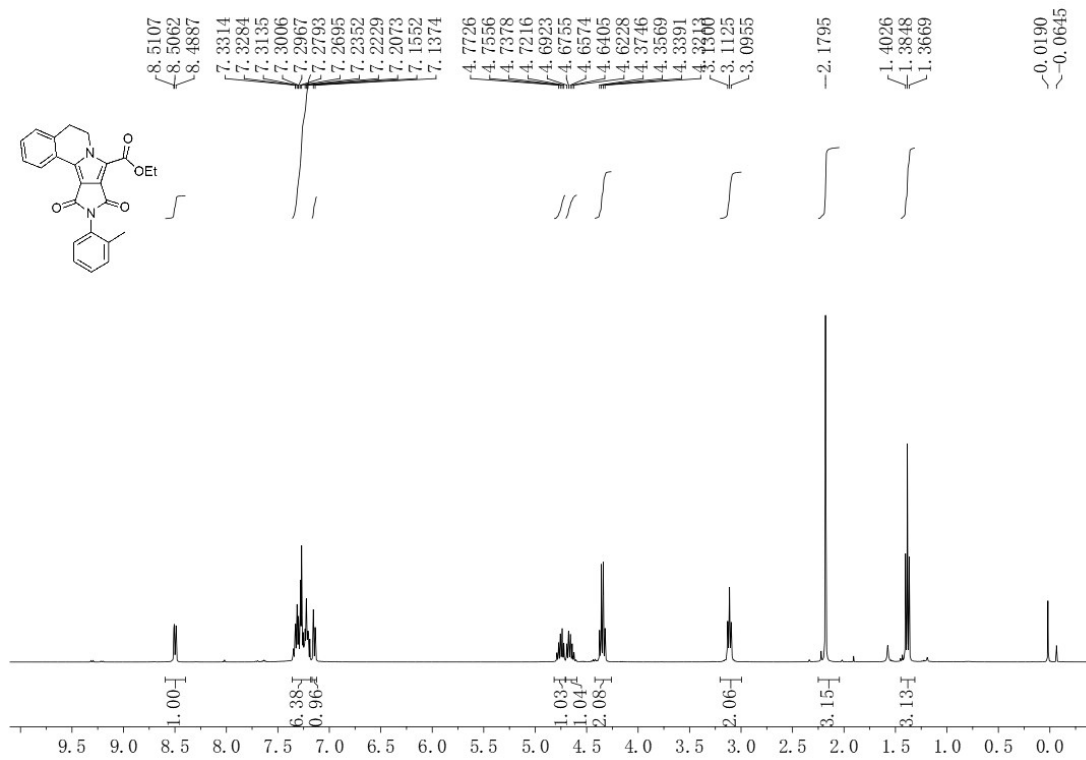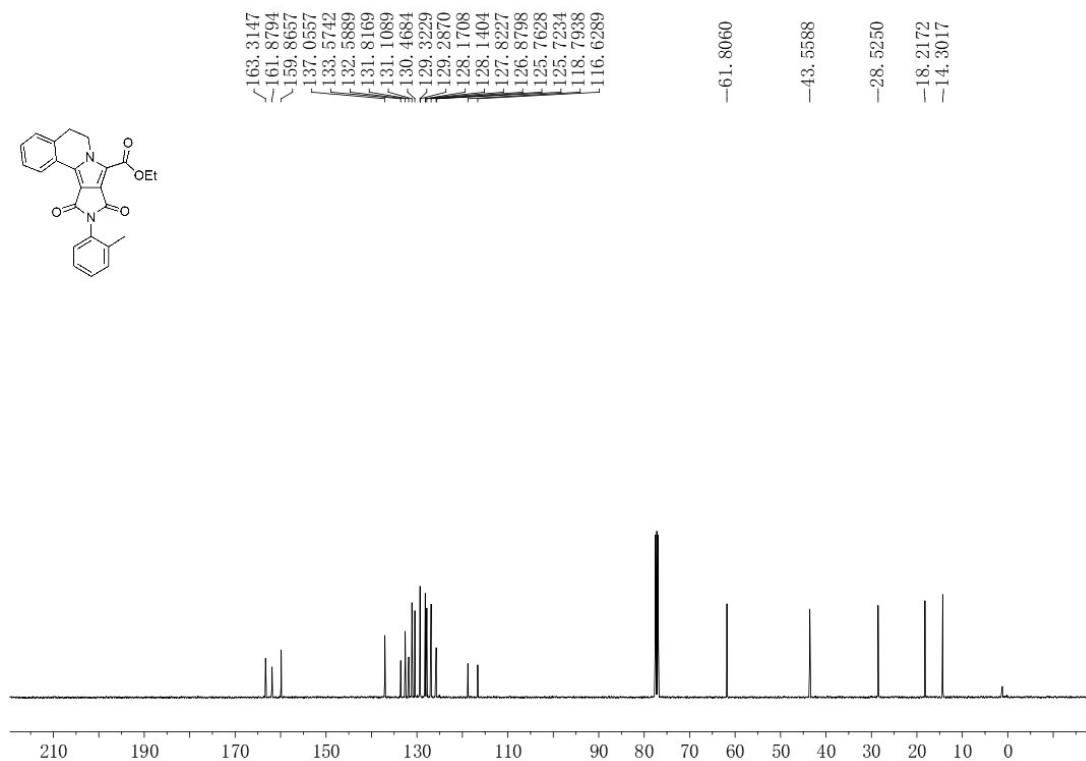

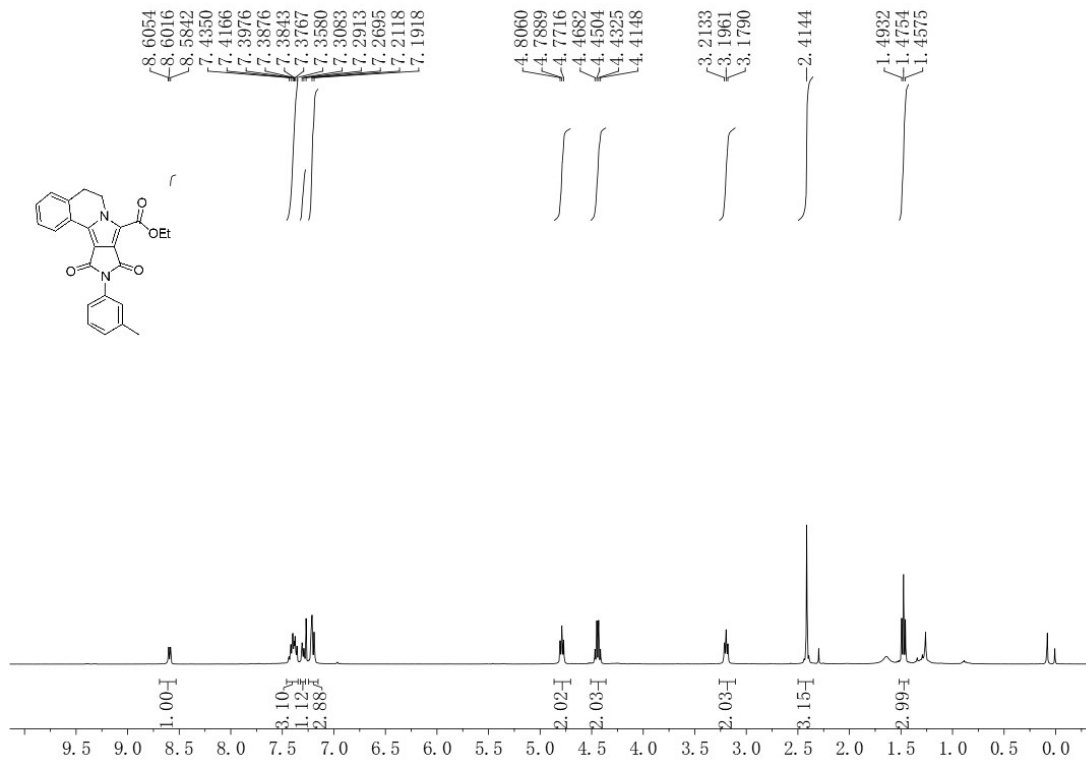

**<sup>1</sup>H NMR of 3d**

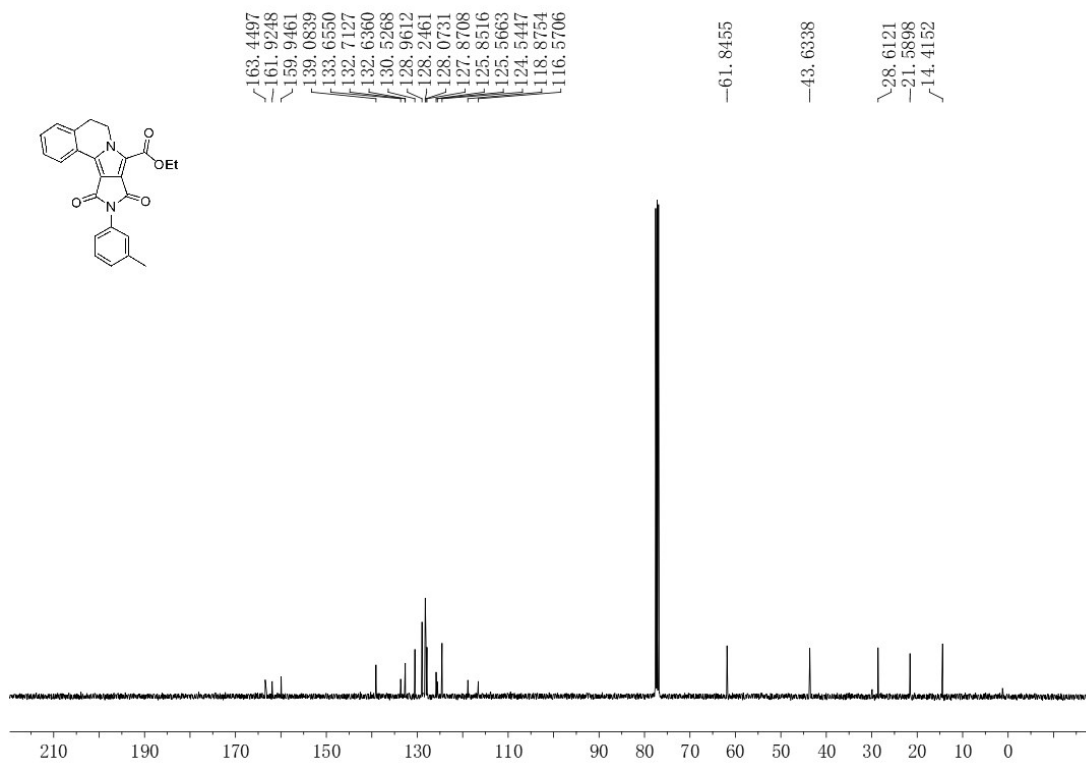

**<sup>13</sup>C NMR of 3d**

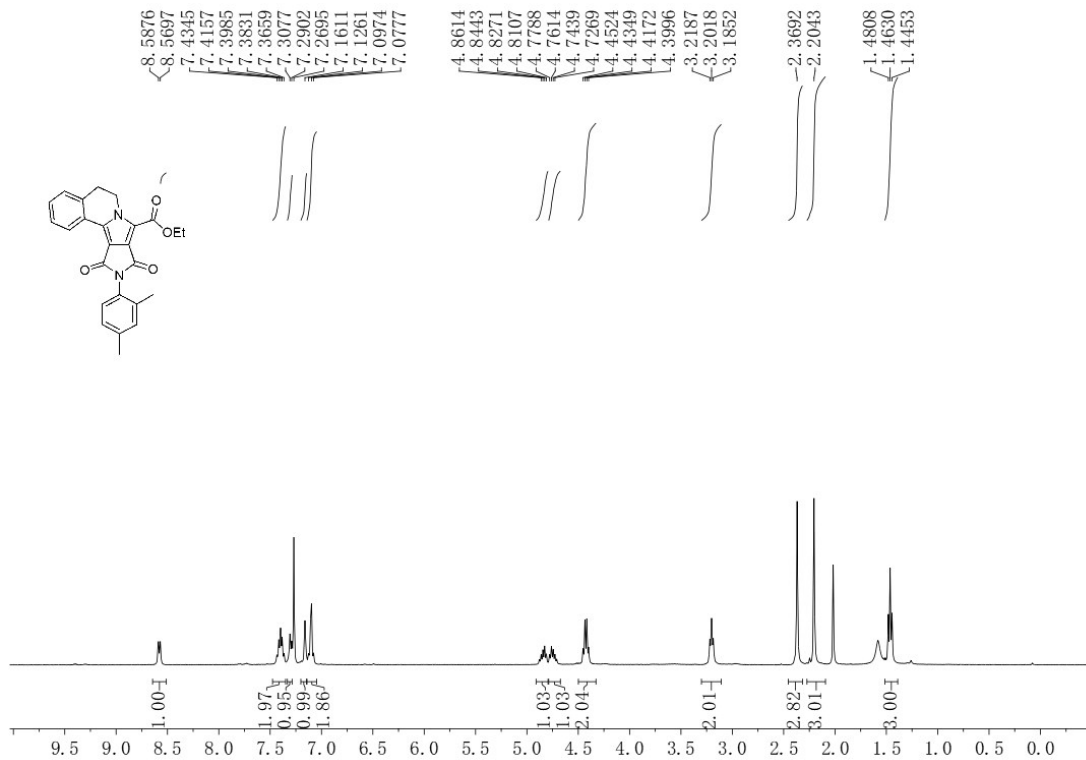

<sup>1</sup>H NMR of **3e**

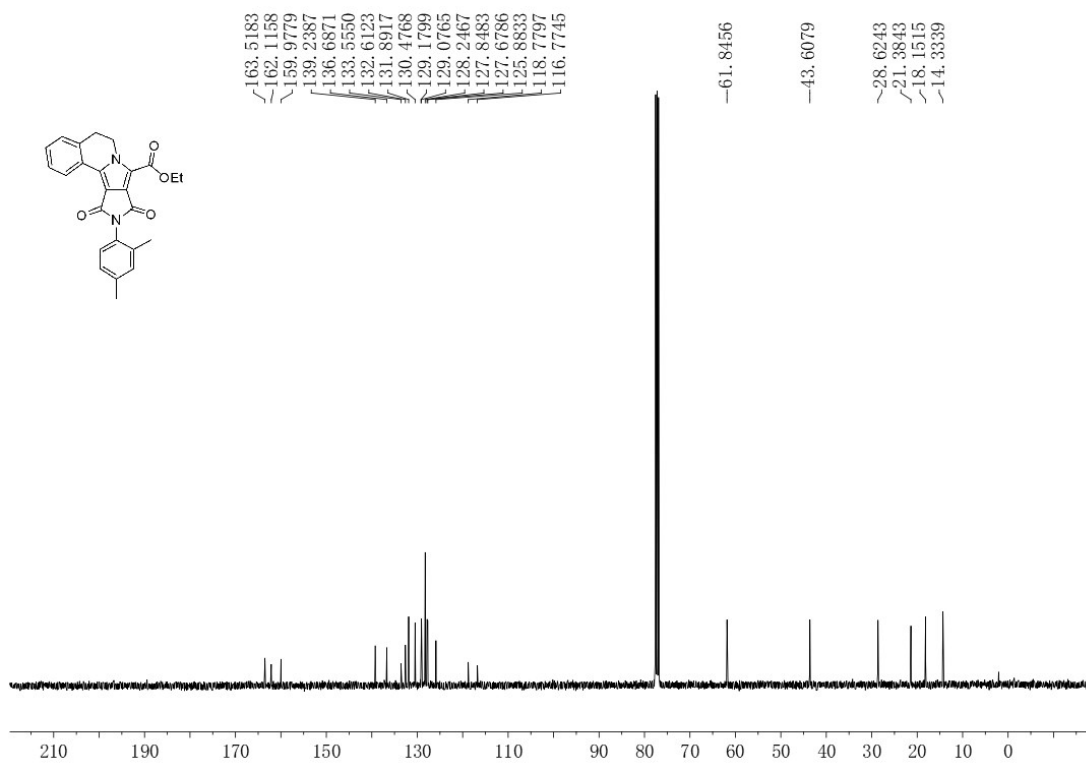

<sup>13</sup>C NMR of **3e**

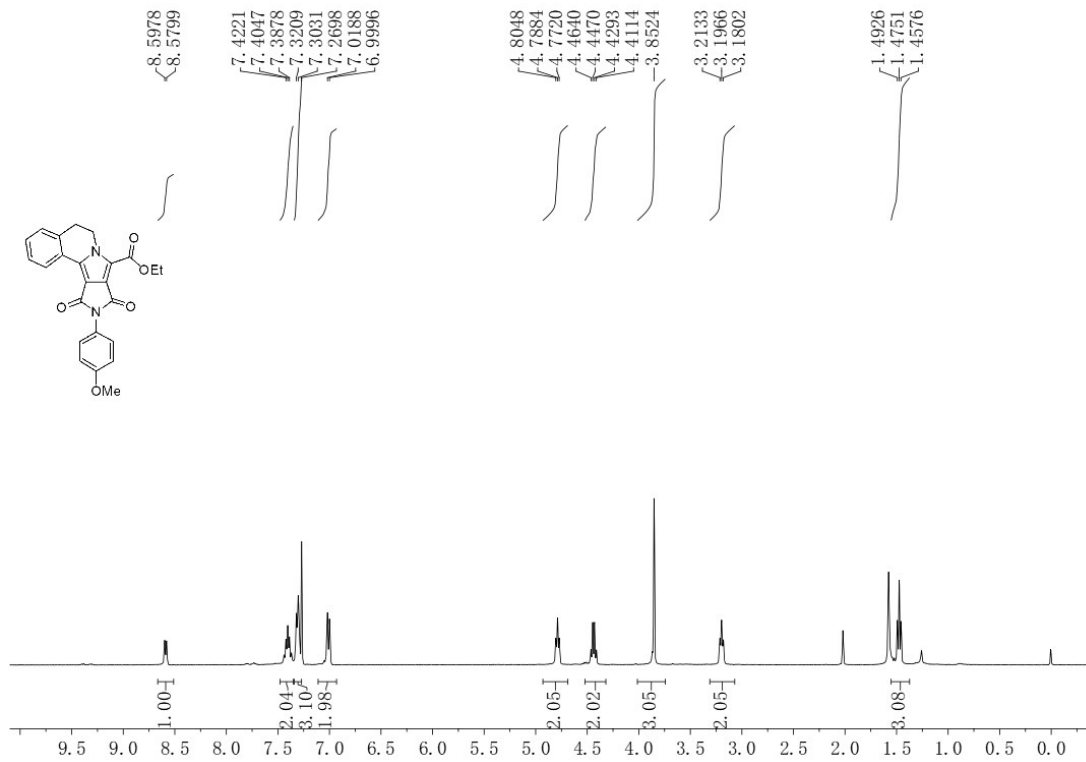

<sup>1</sup>H NMR of 3f

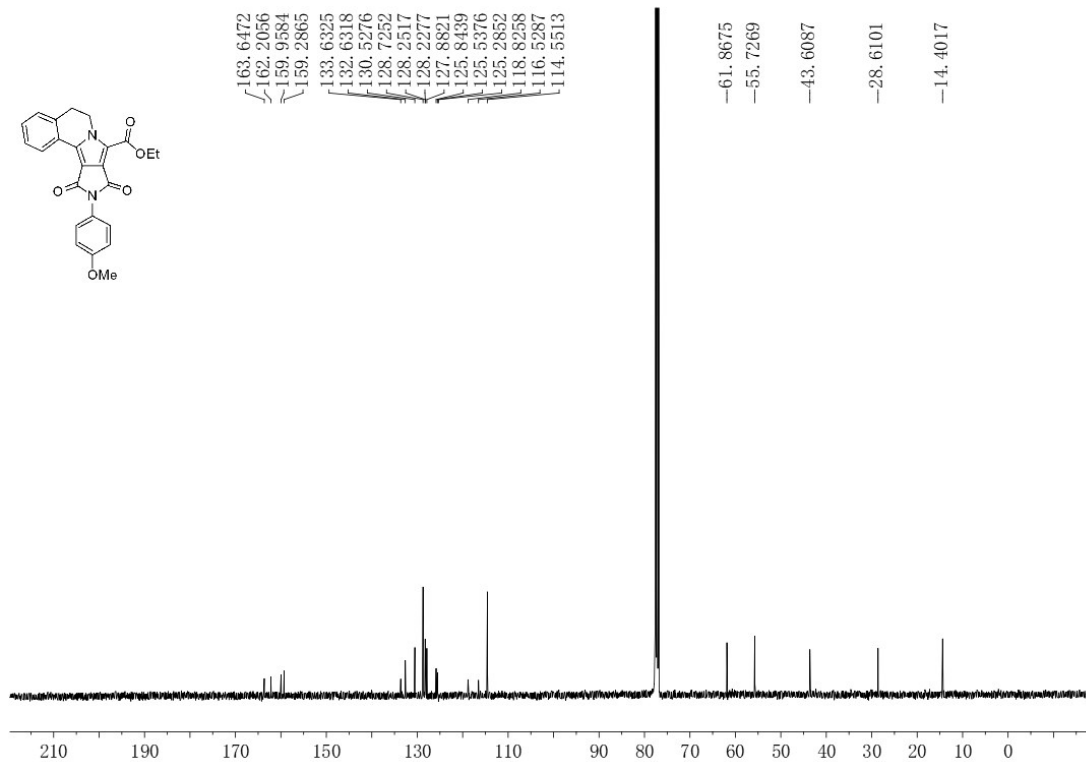

<sup>13</sup>C NMR of 3f

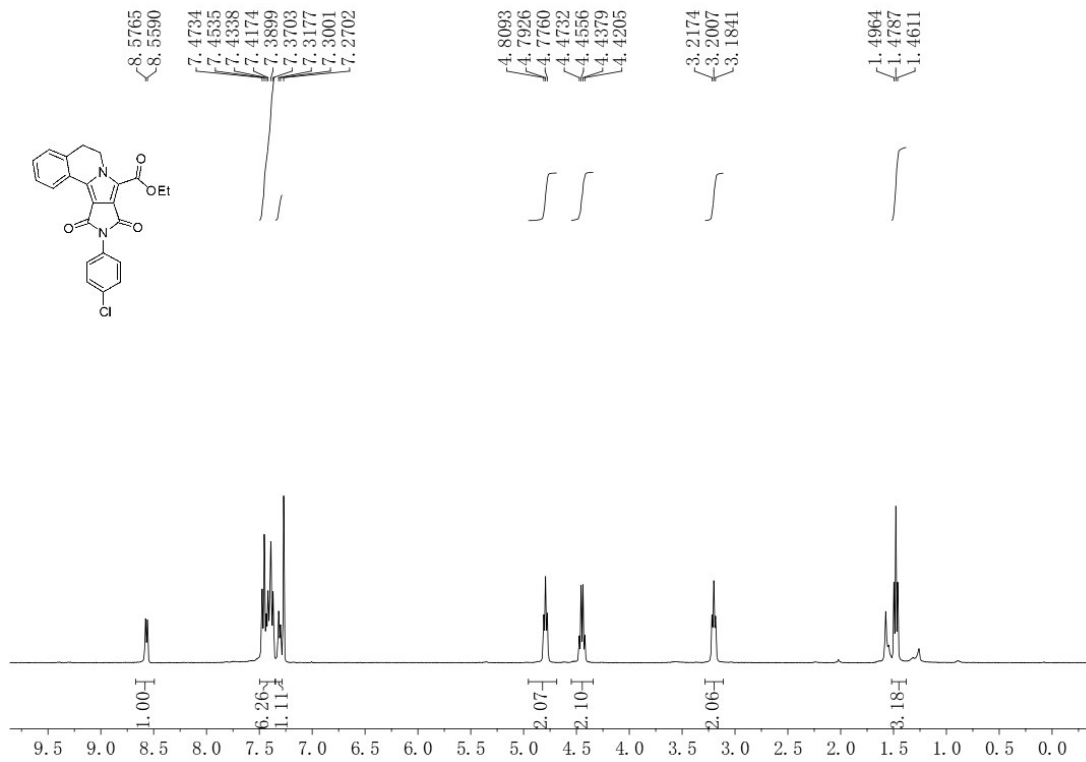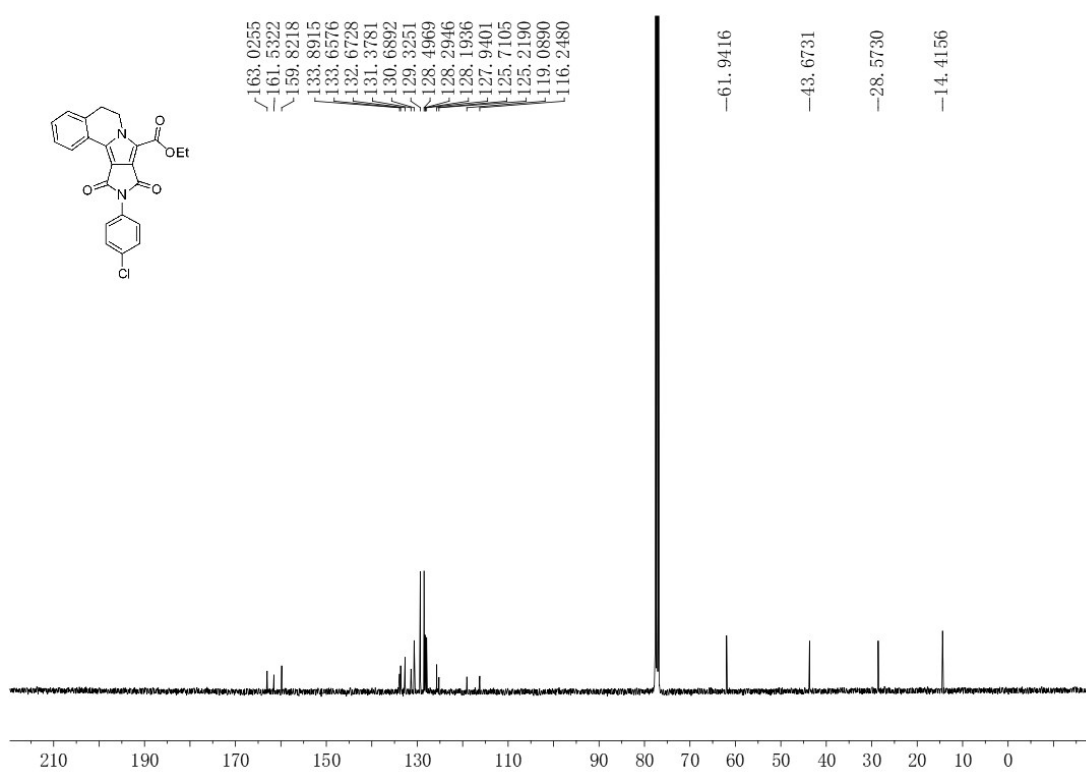



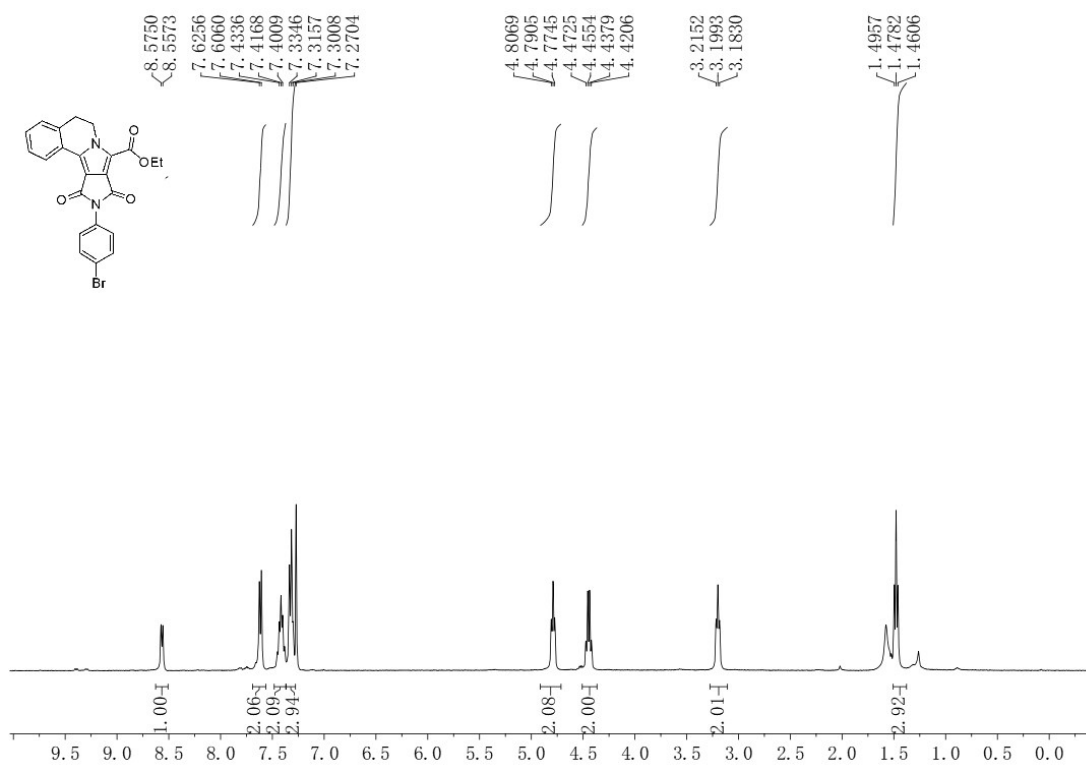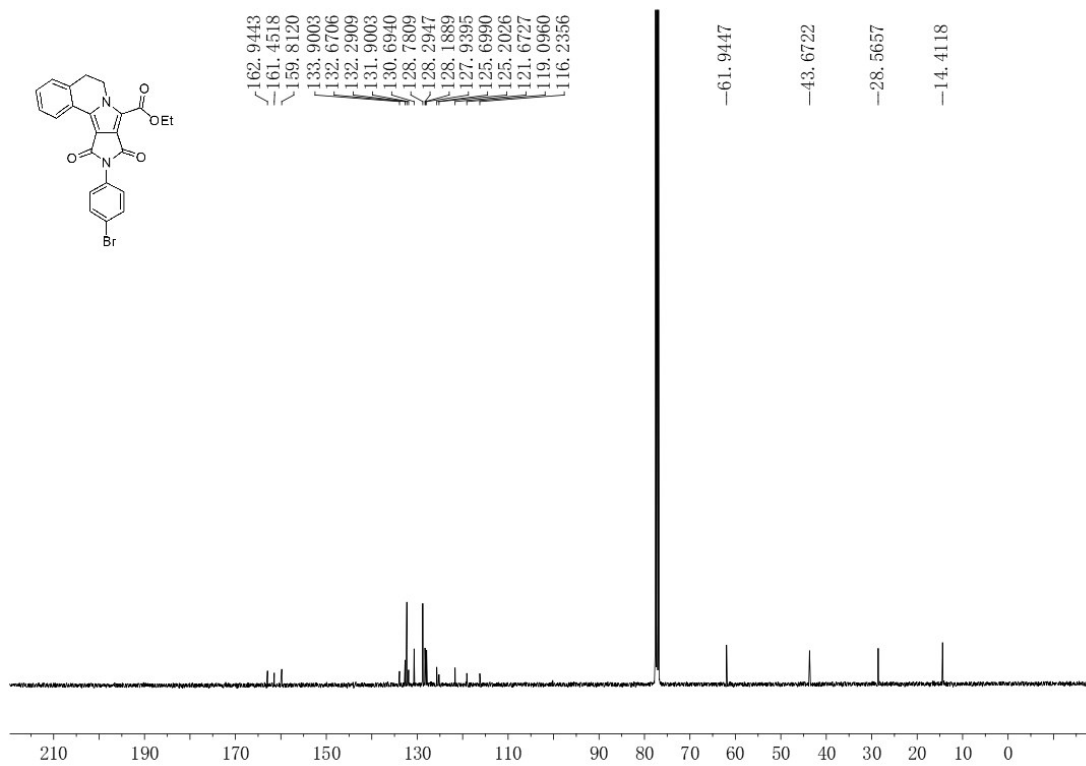

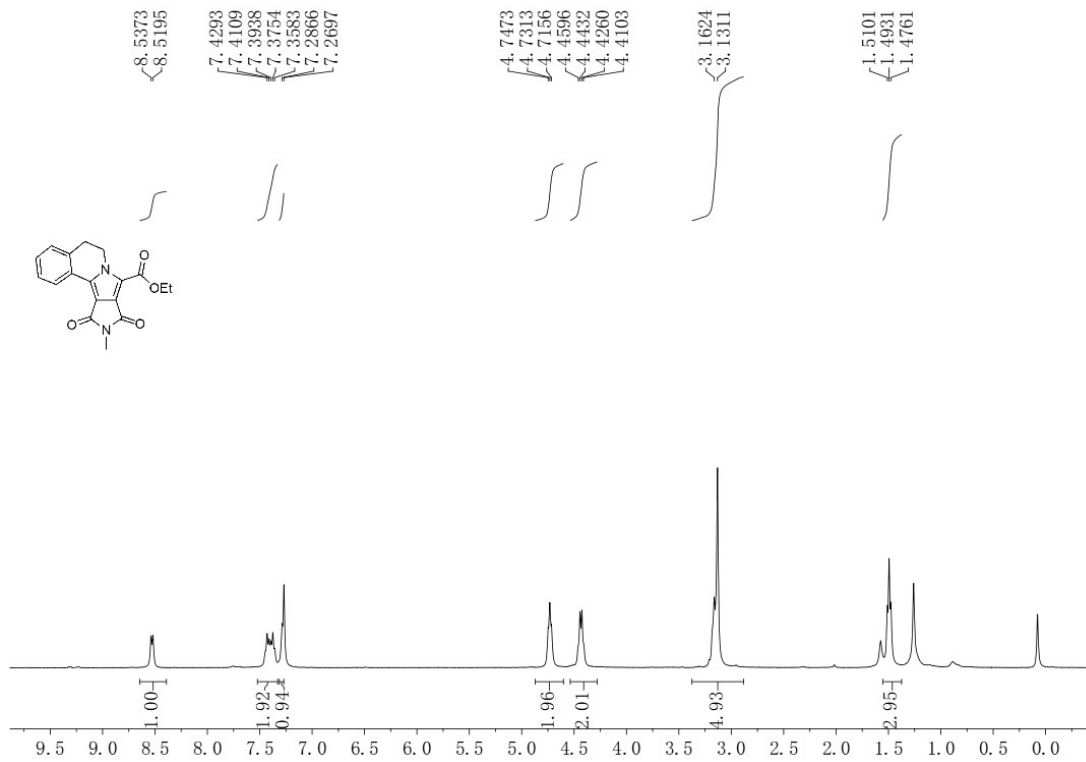

<sup>1</sup>H NMR of **3i**

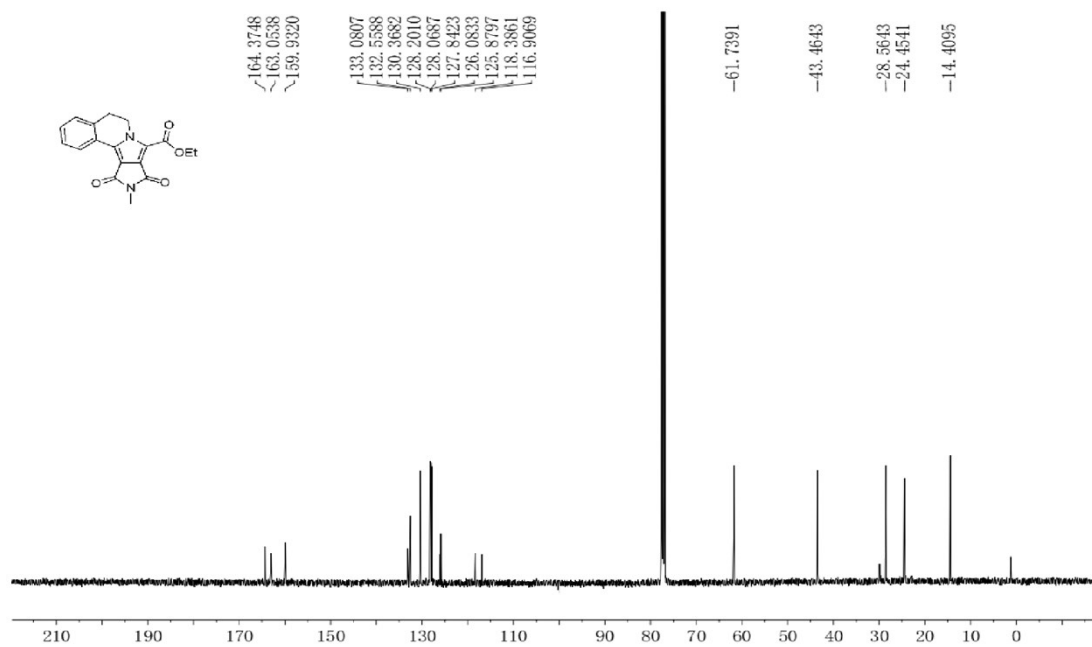

<sup>13</sup>C NMR of **3i**

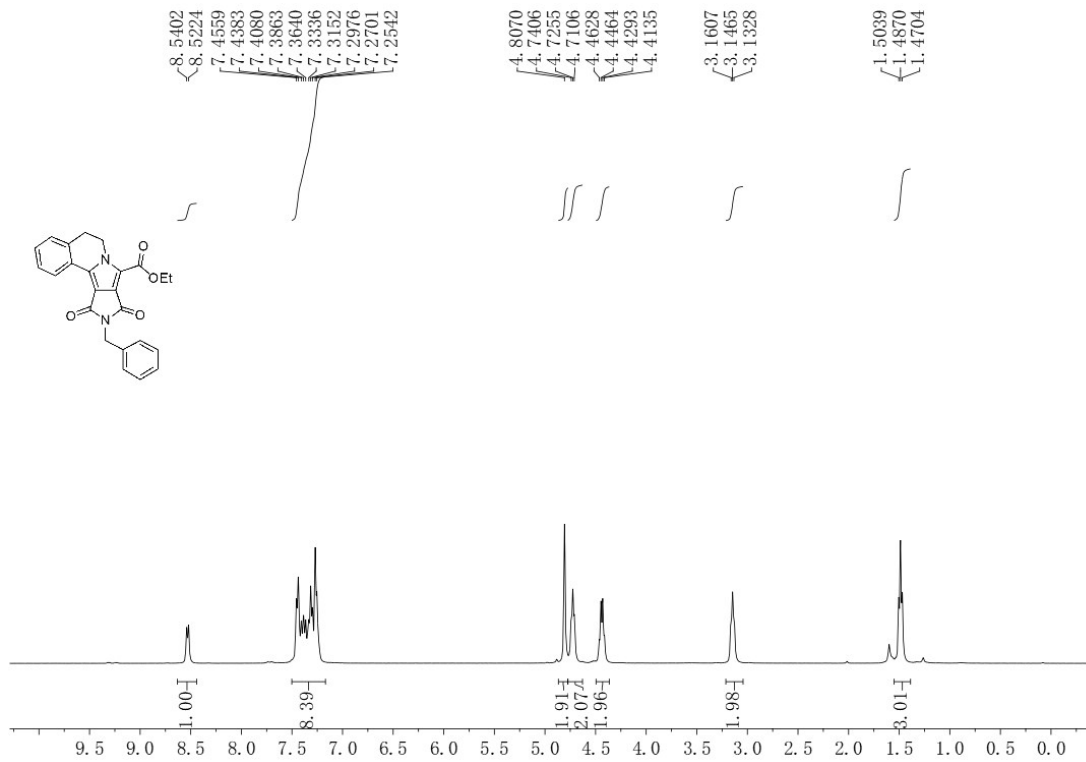

$^1\text{H}$  NMR of **3j**

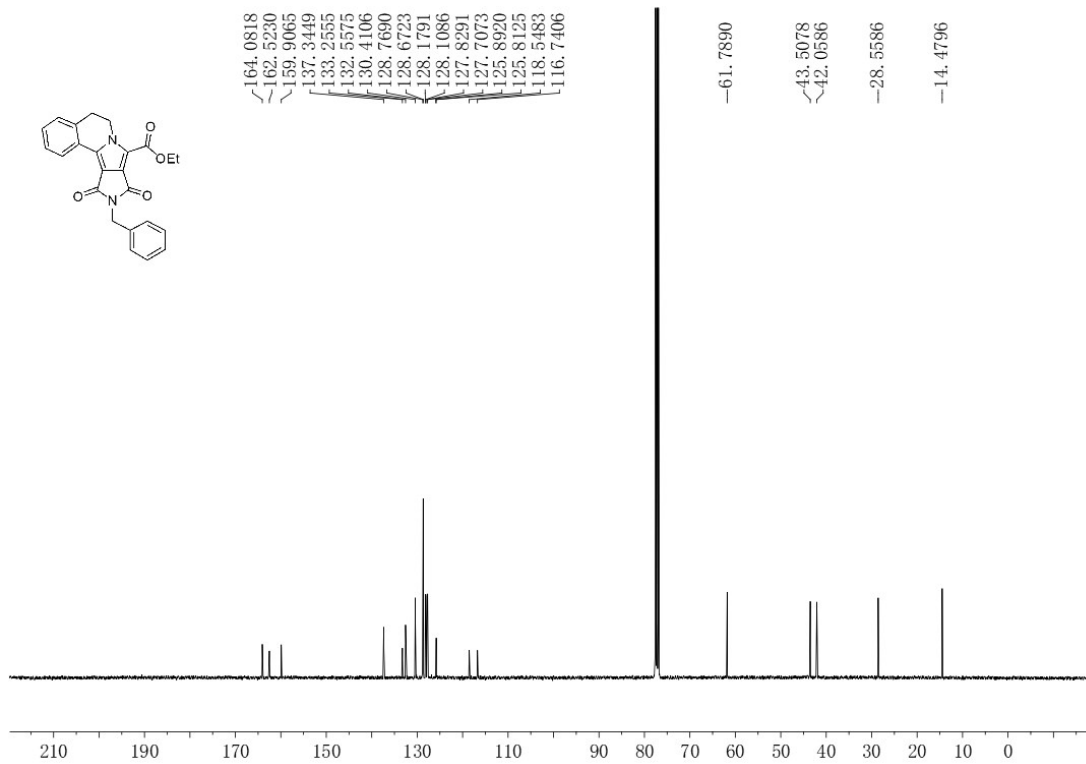

$^{13}\text{C}$  NMR of **3j**

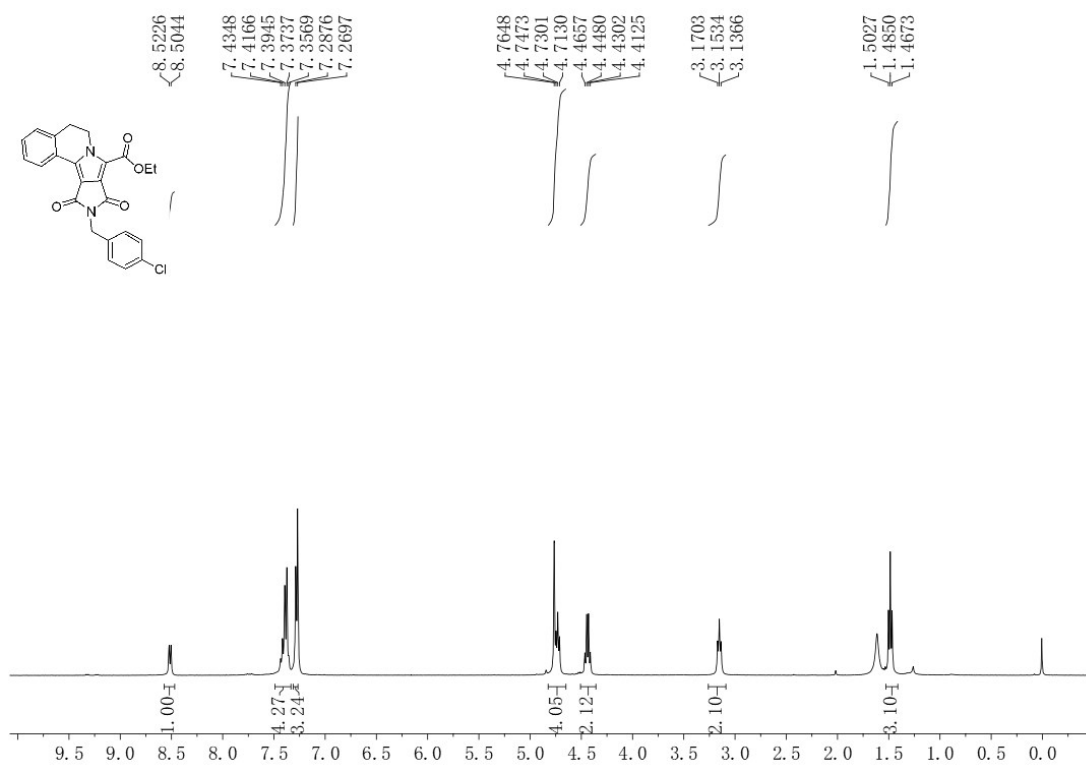

**<sup>1</sup>H NMR of 3k**

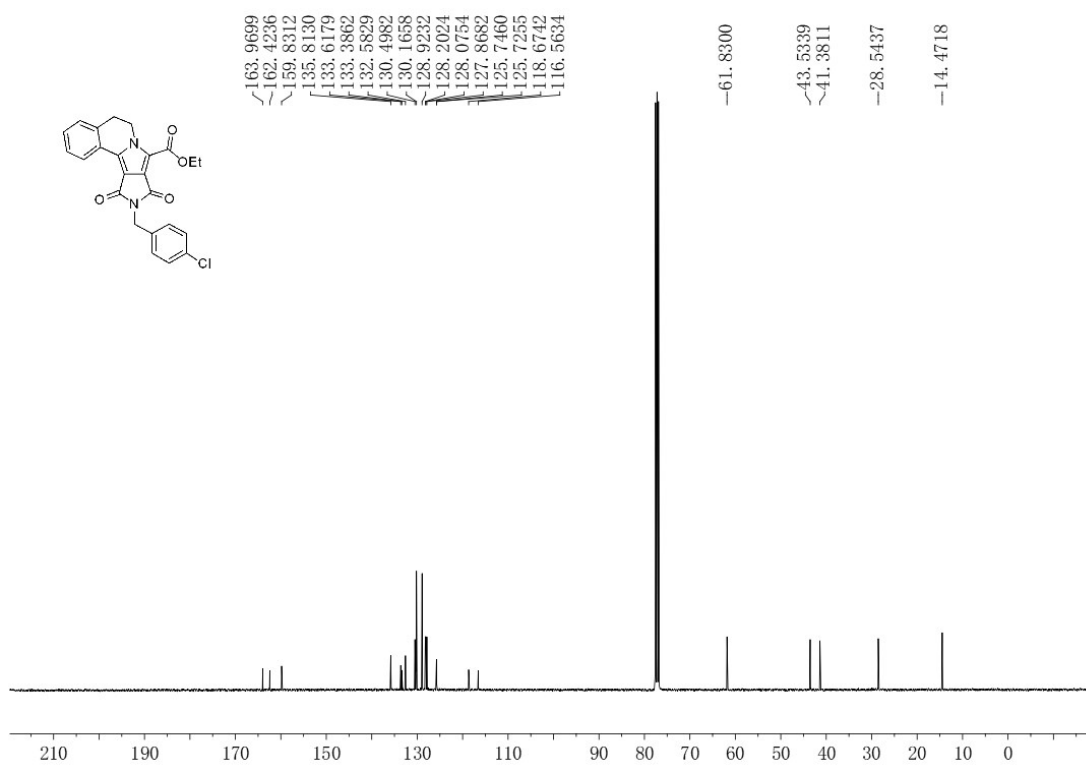

**<sup>13</sup>C NMR of 3k**

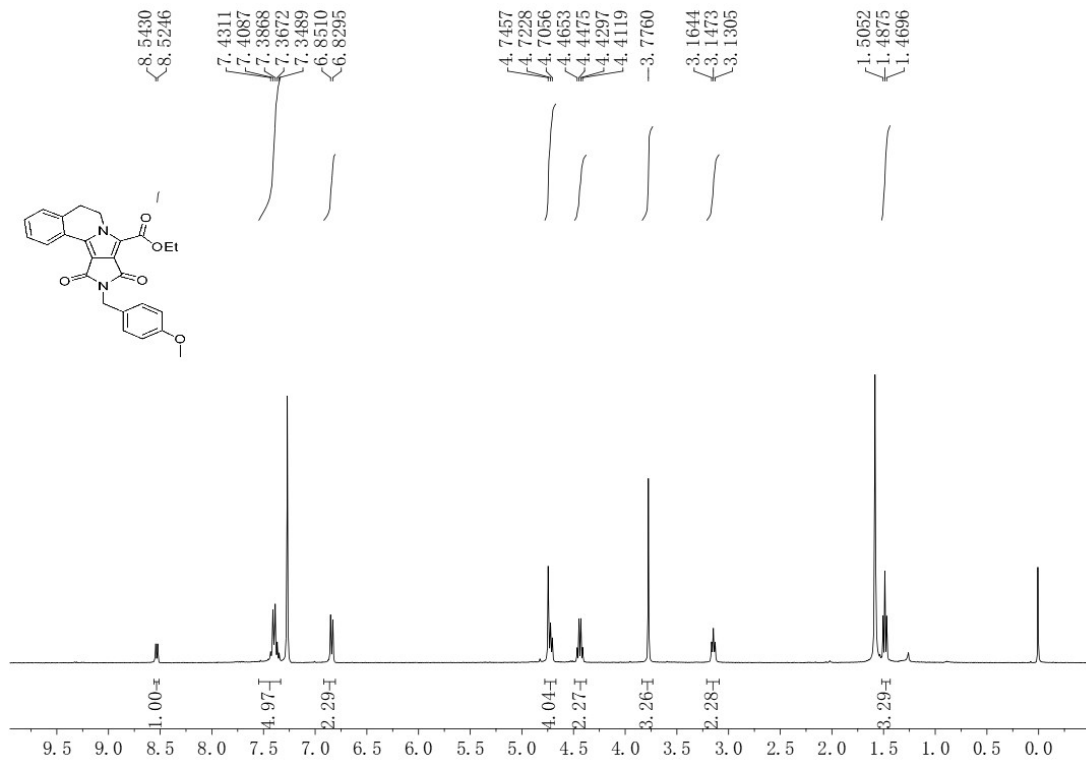

**<sup>1</sup>H NMR of 31**

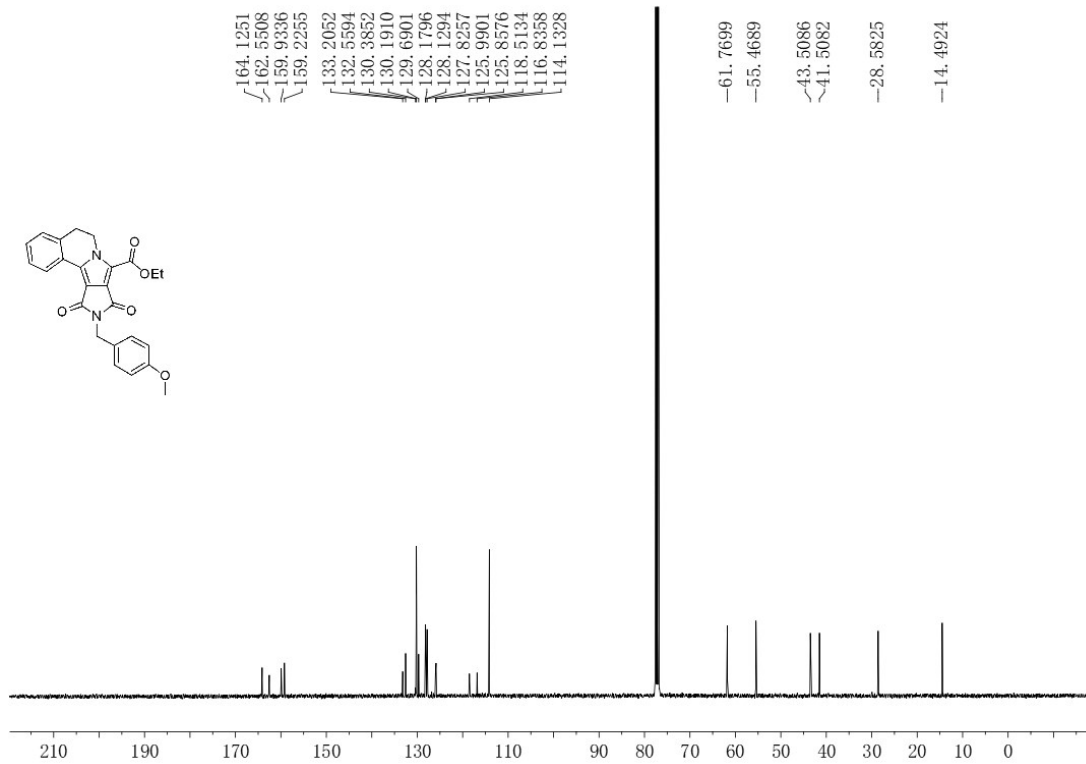

**<sup>13</sup>C NMR of 31**

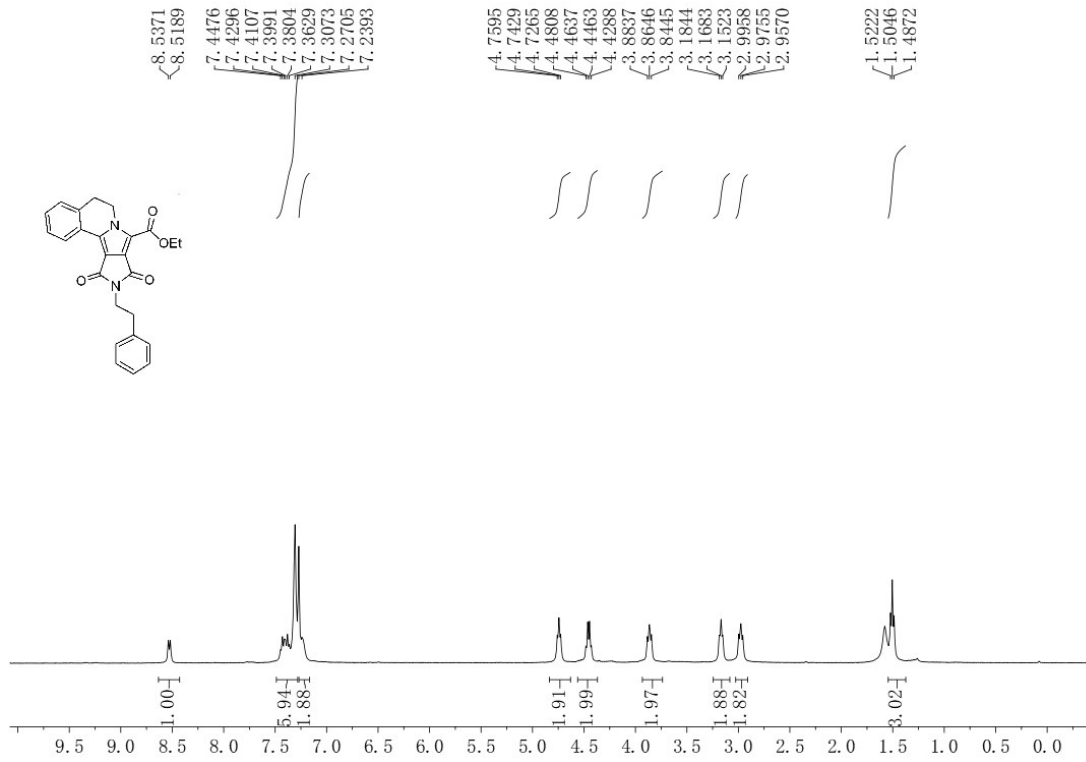

<sup>1</sup>H NMR of **3m**

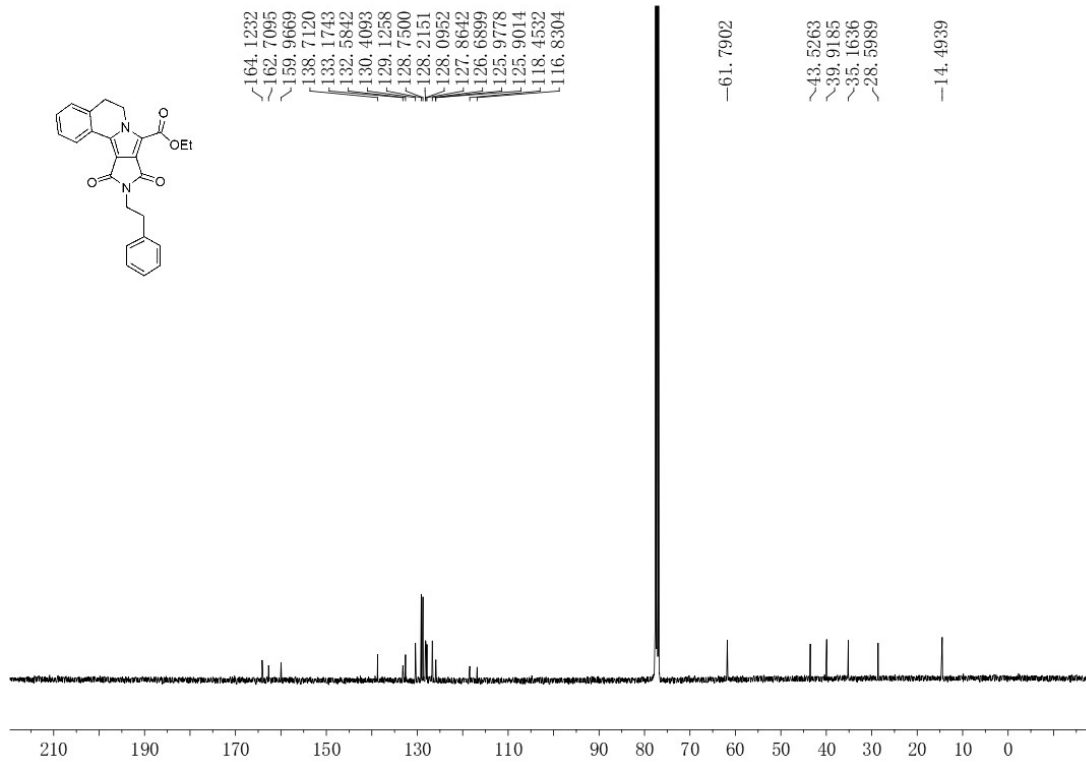

<sup>13</sup>C NMR of **3m**

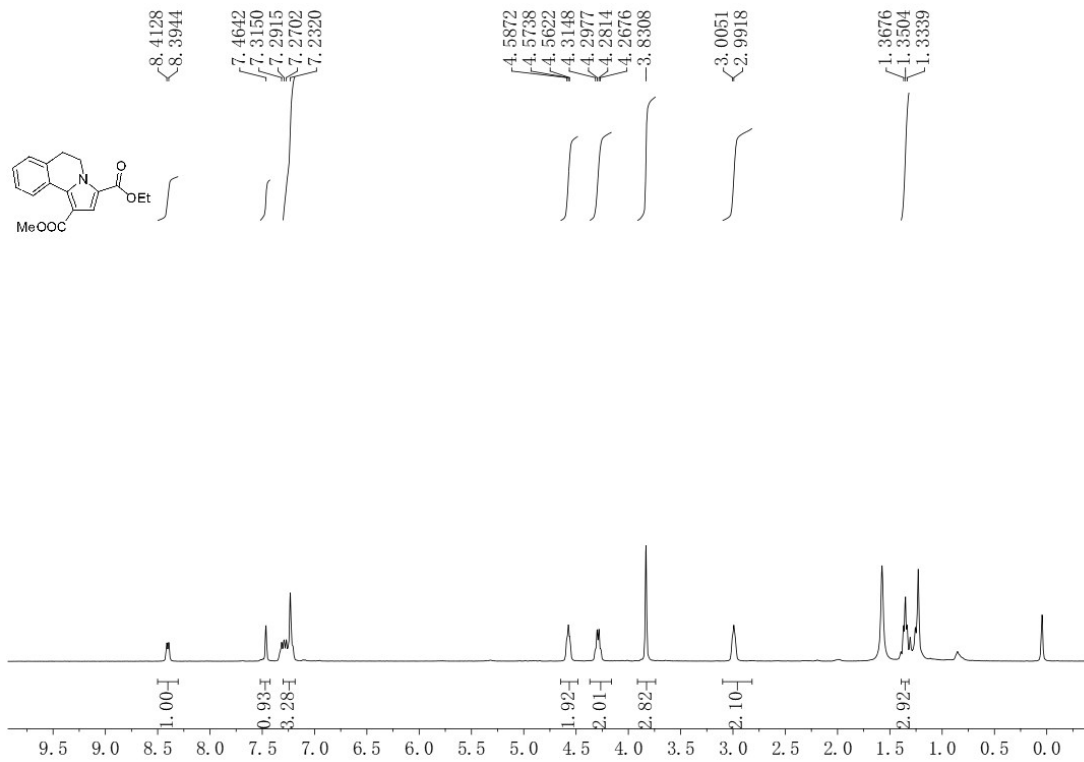

$^1\text{H}$  NMR of **3n**

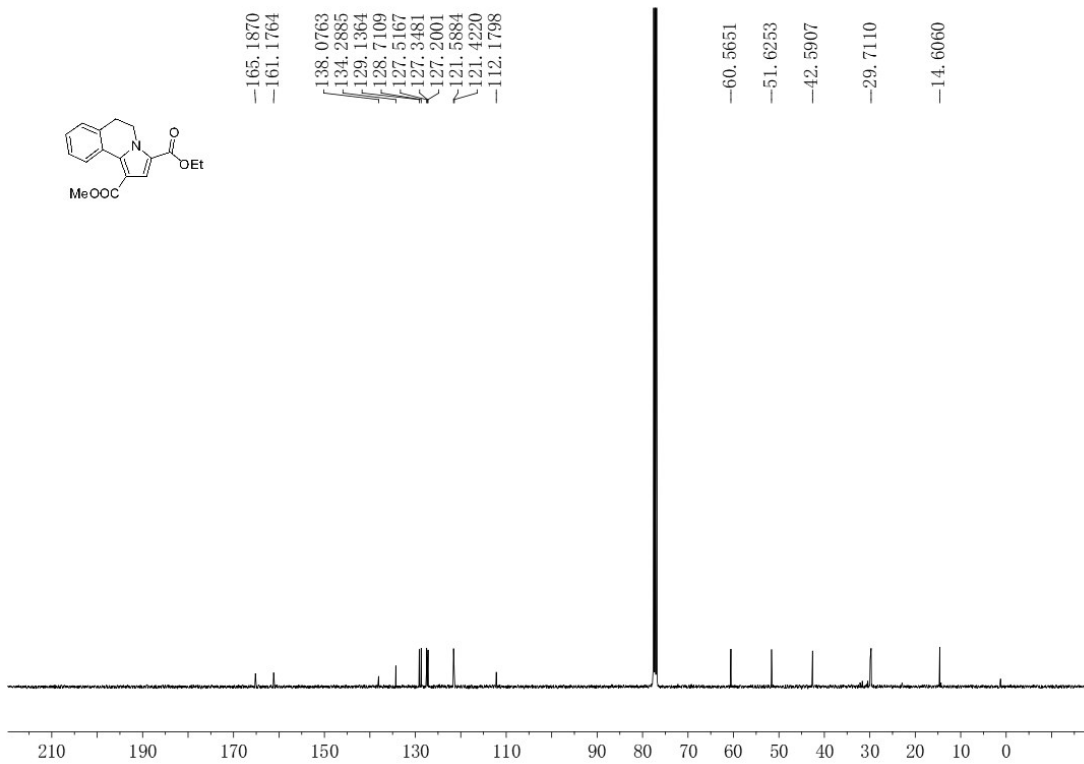

$^{13}\text{C}$  NMR of **3n**

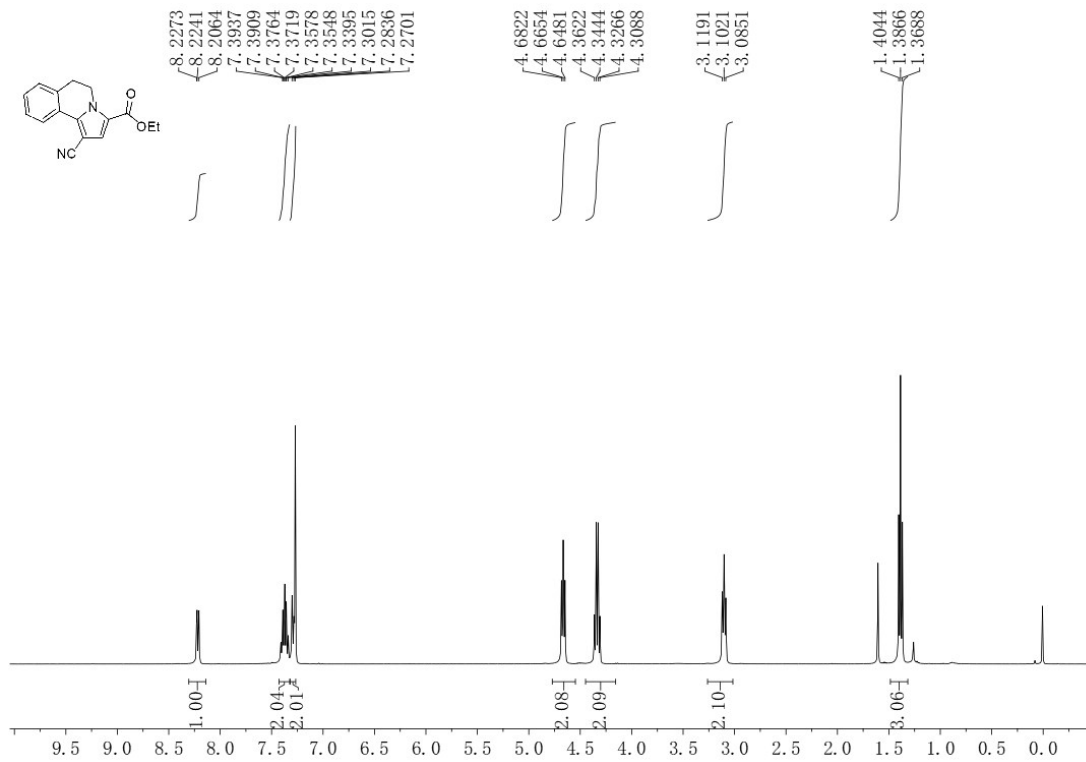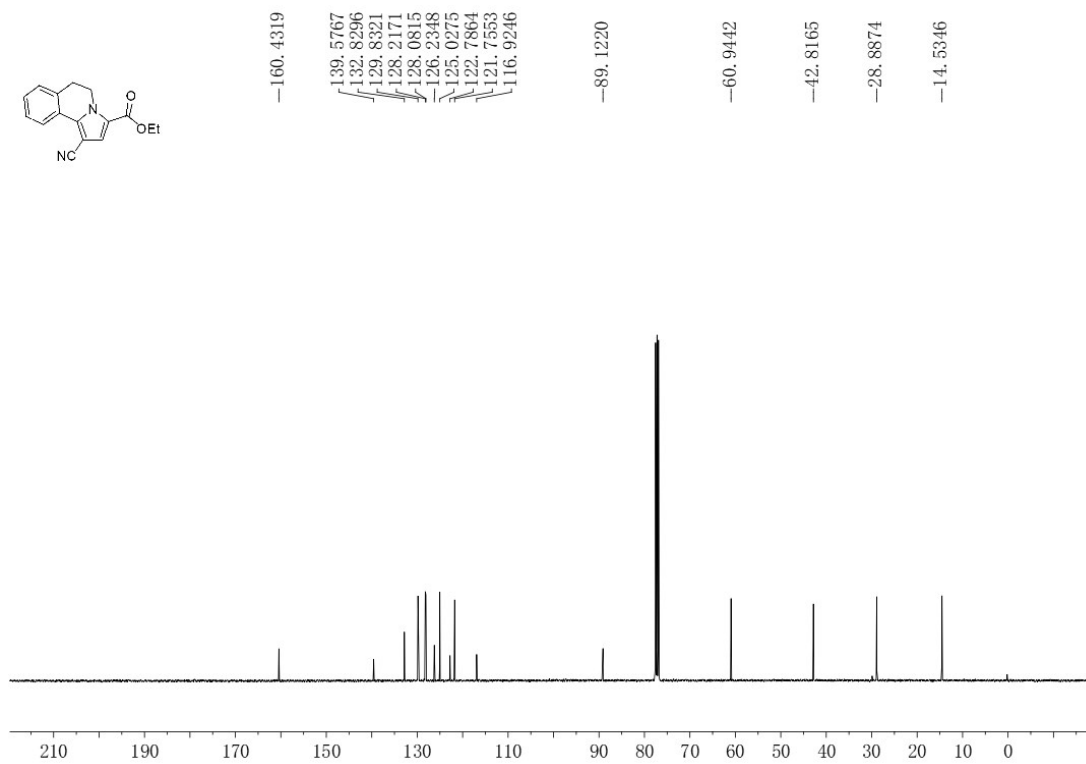



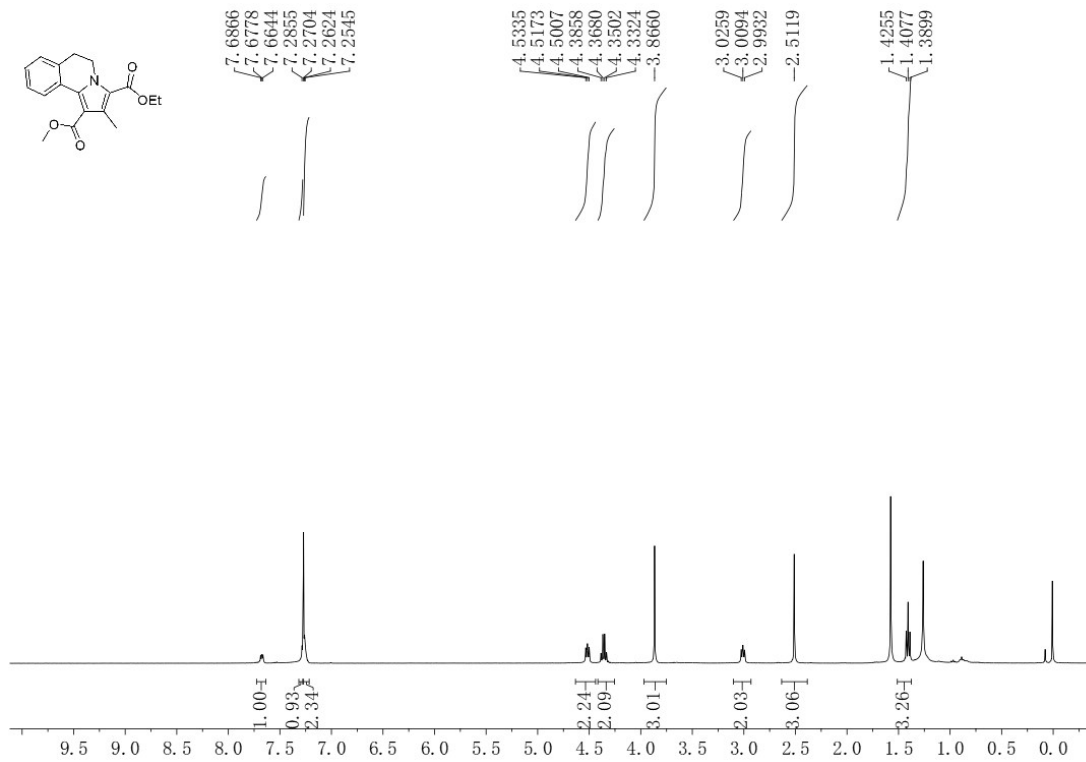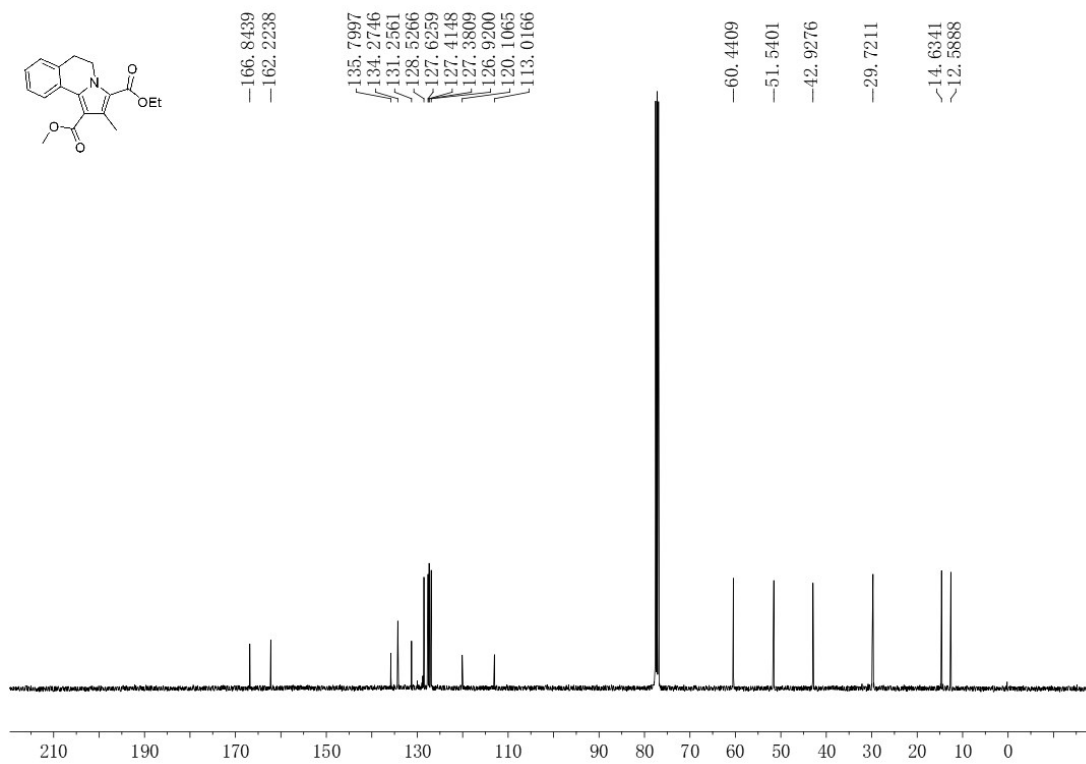

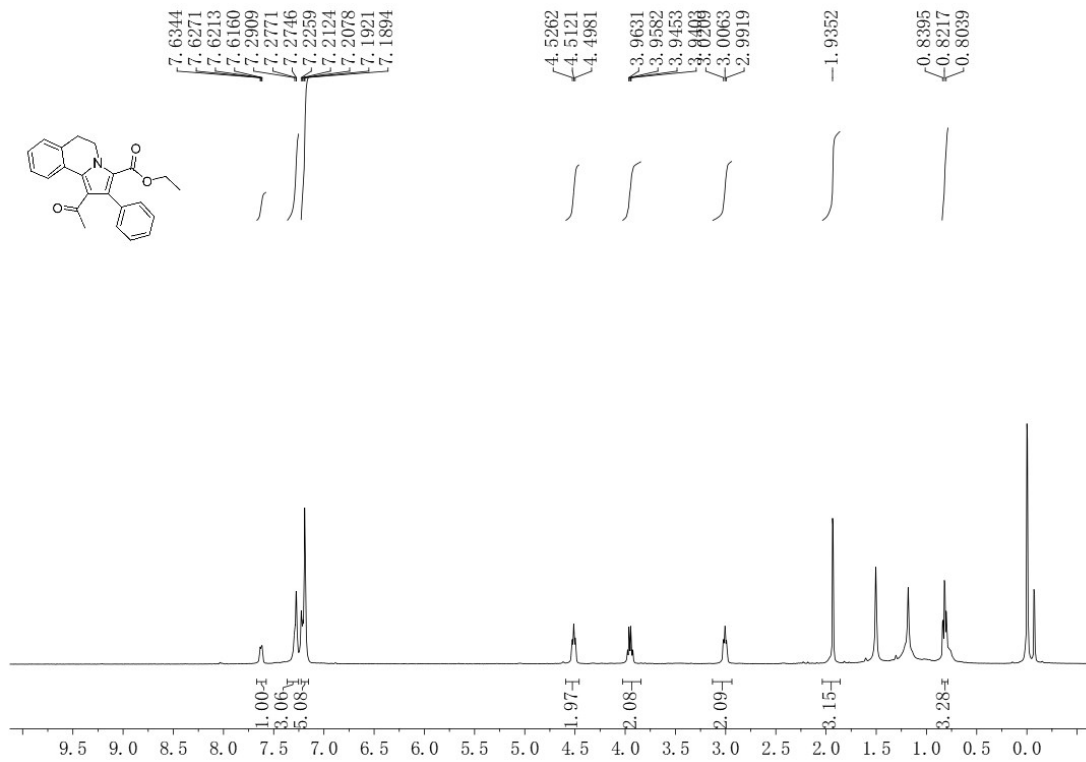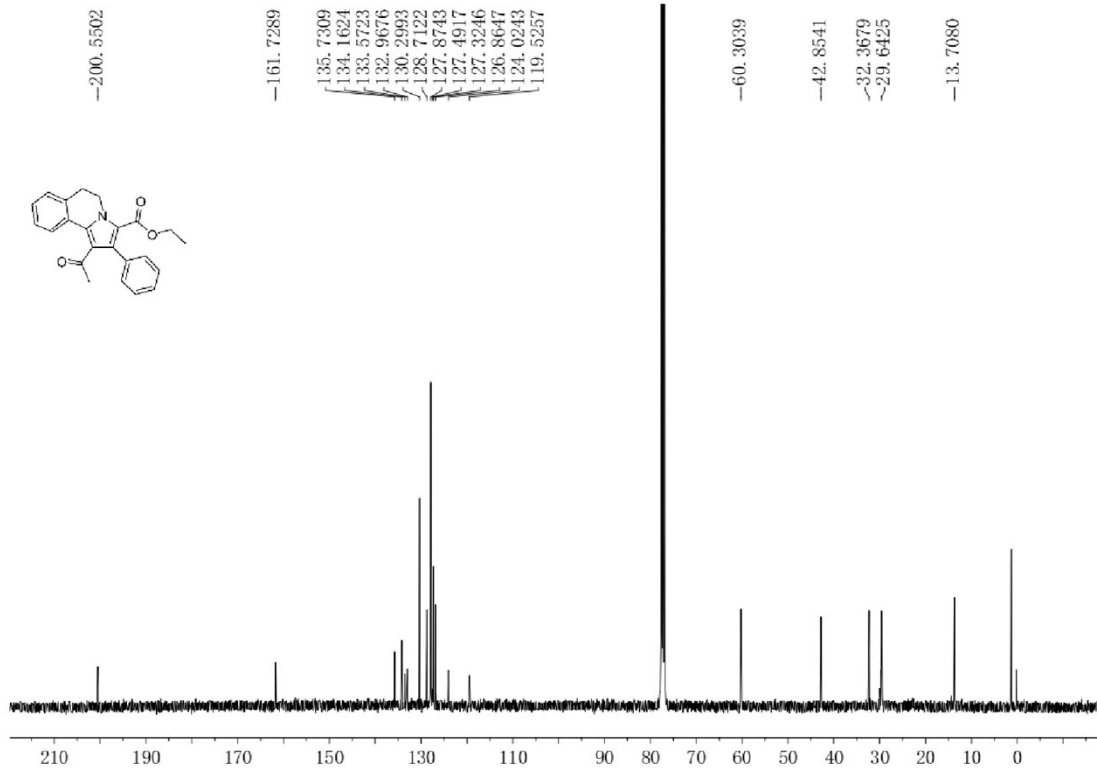

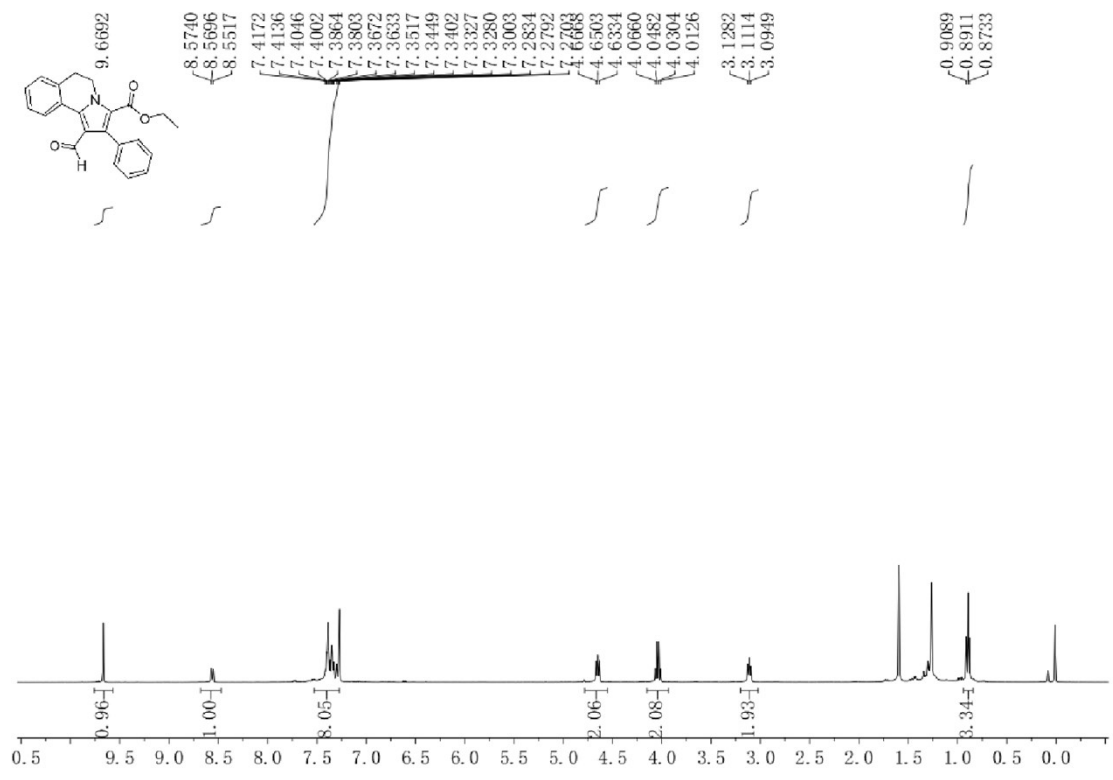

<sup>1</sup>H NMR of **3s**

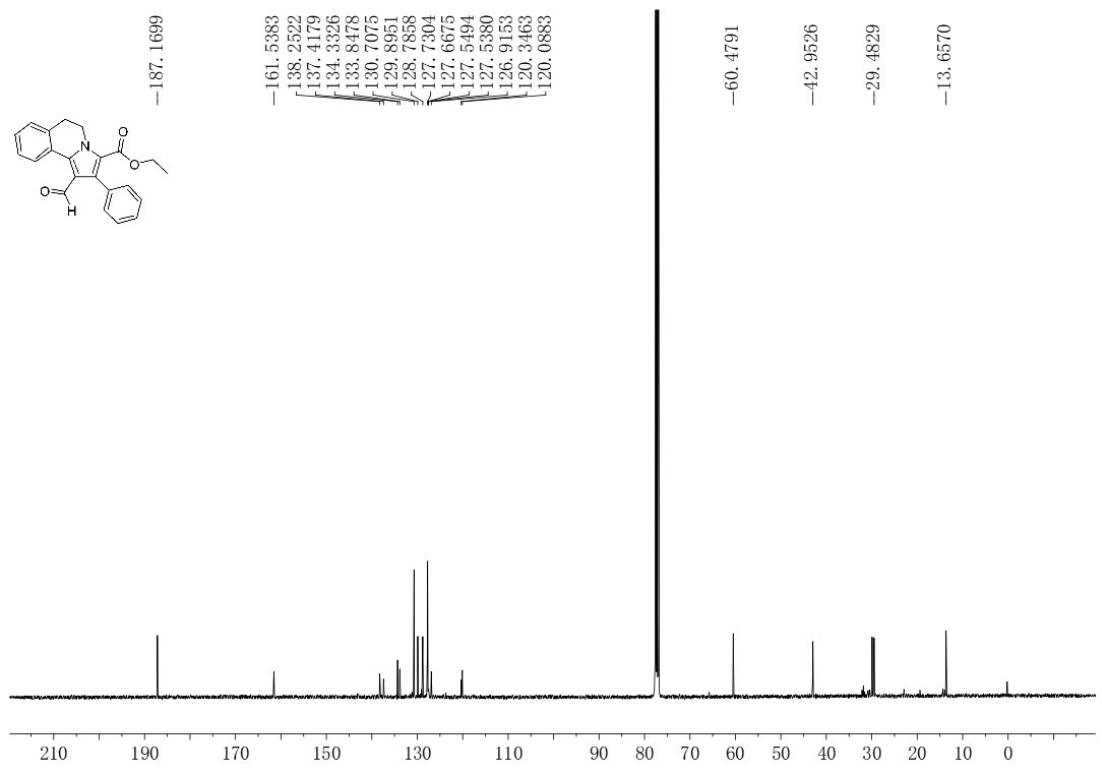

<sup>13</sup>C NMR of **3s**

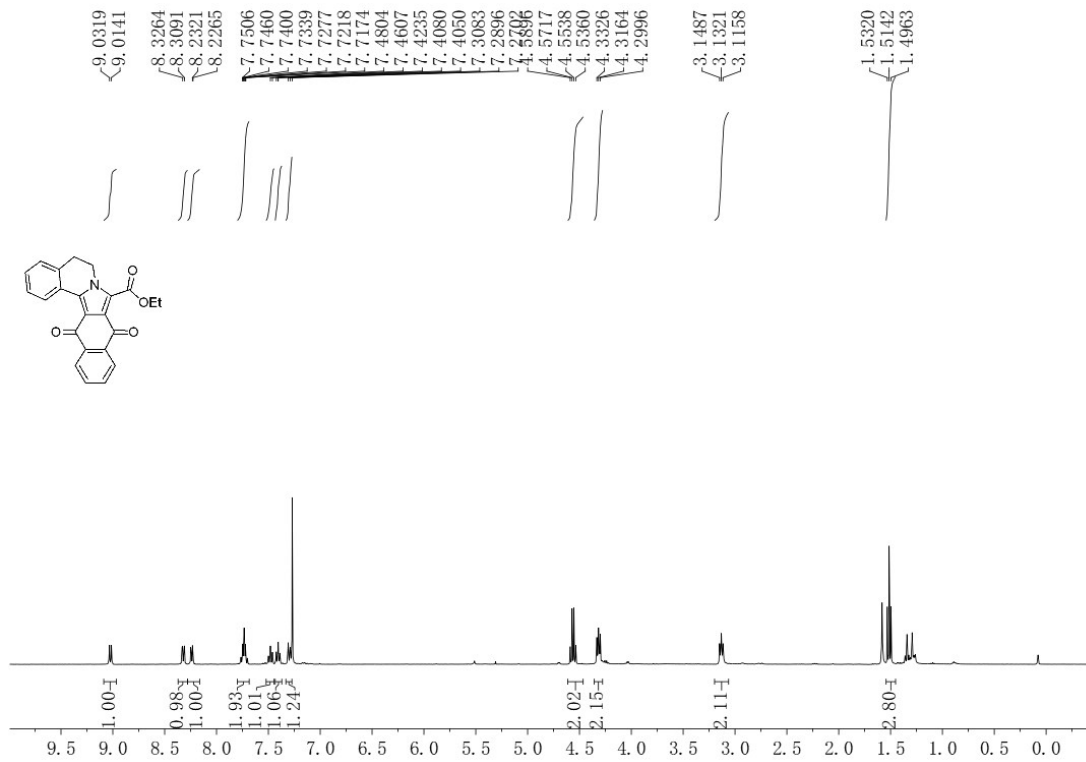

<sup>1</sup>H NMR of 3t

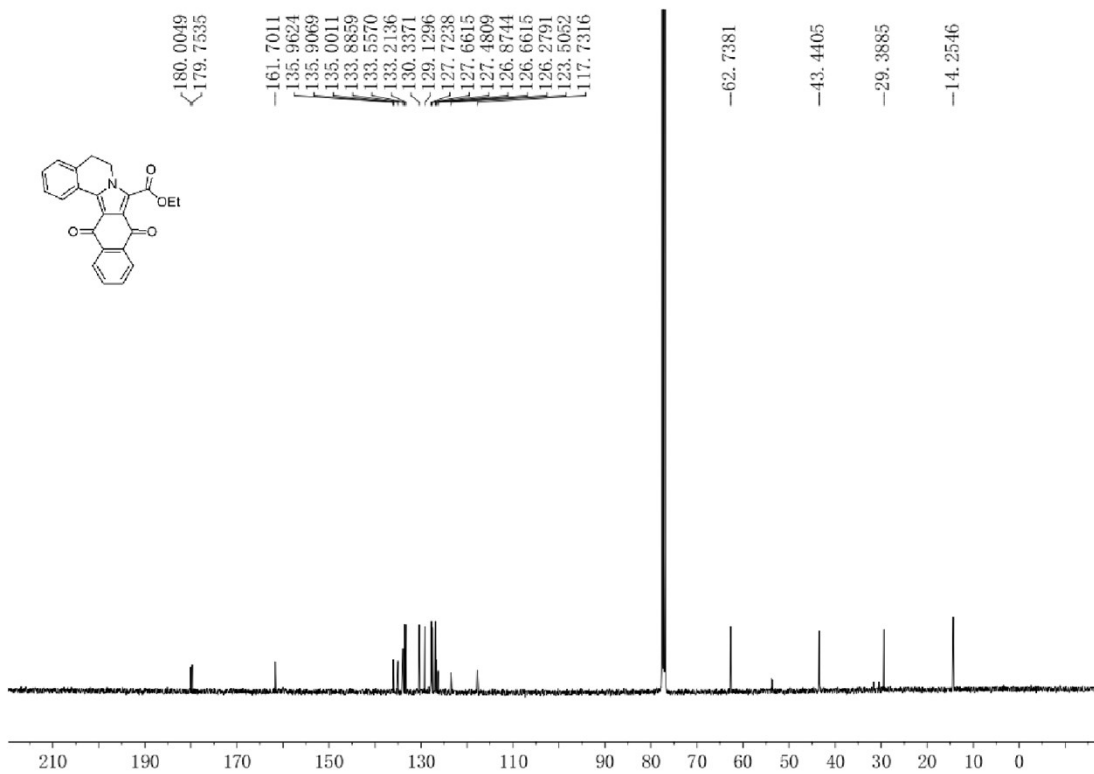

<sup>13</sup>C NMR of 3t

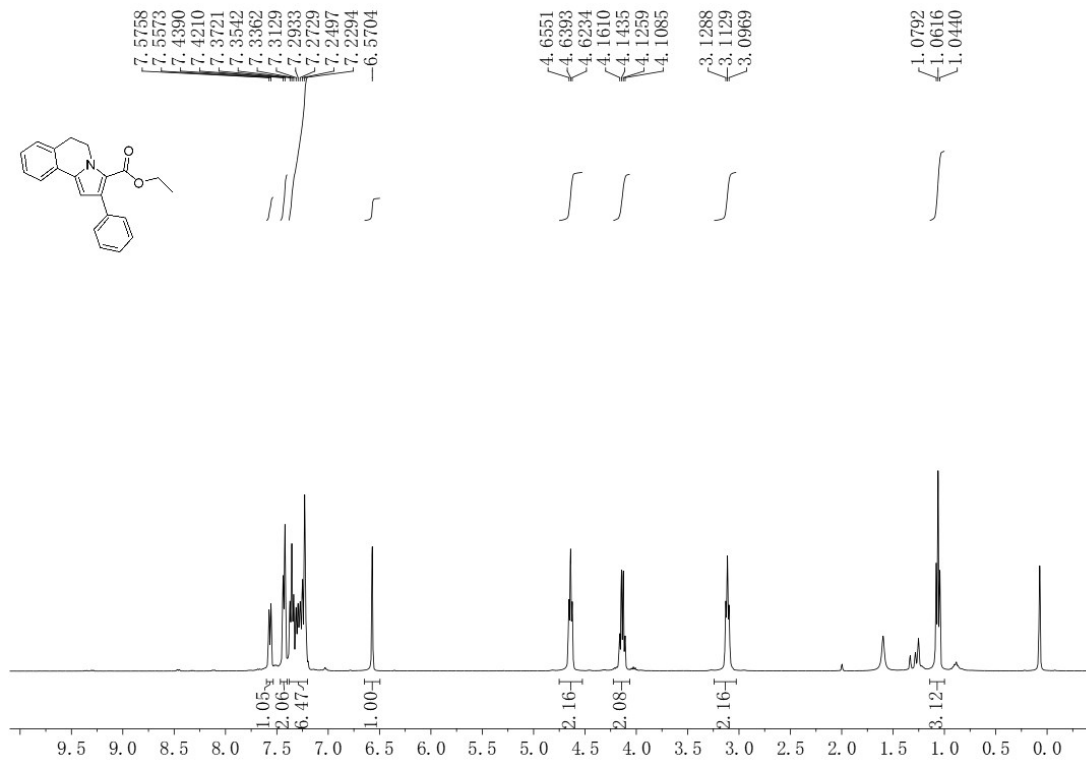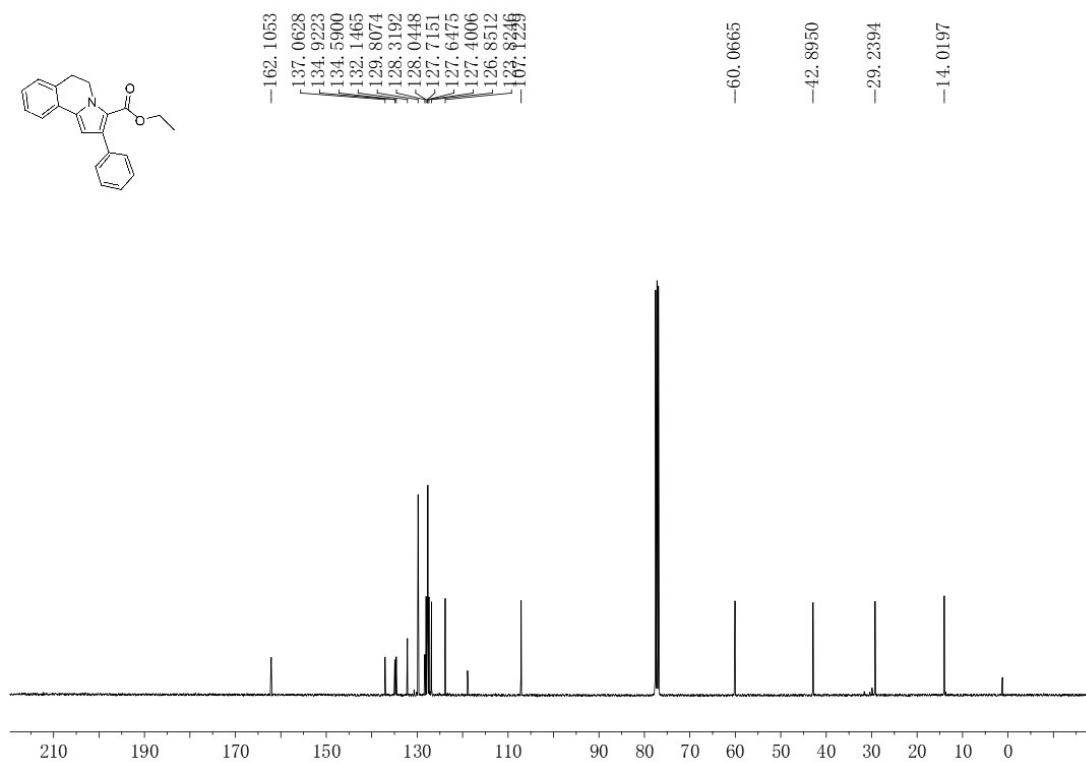

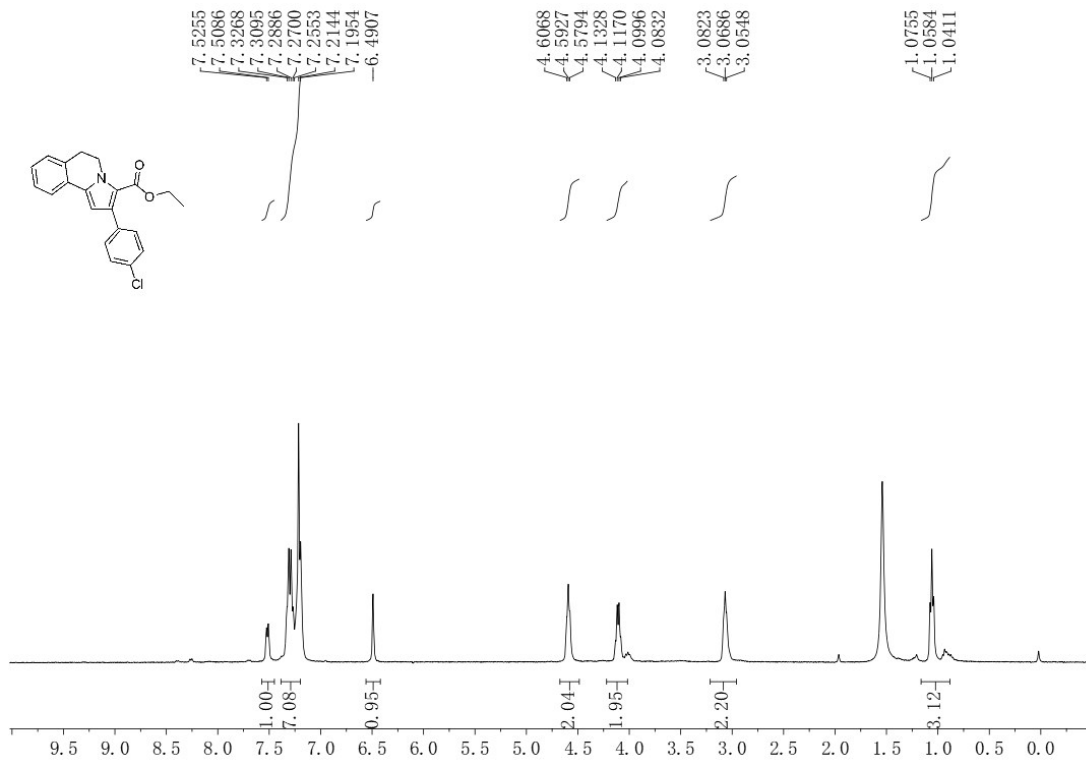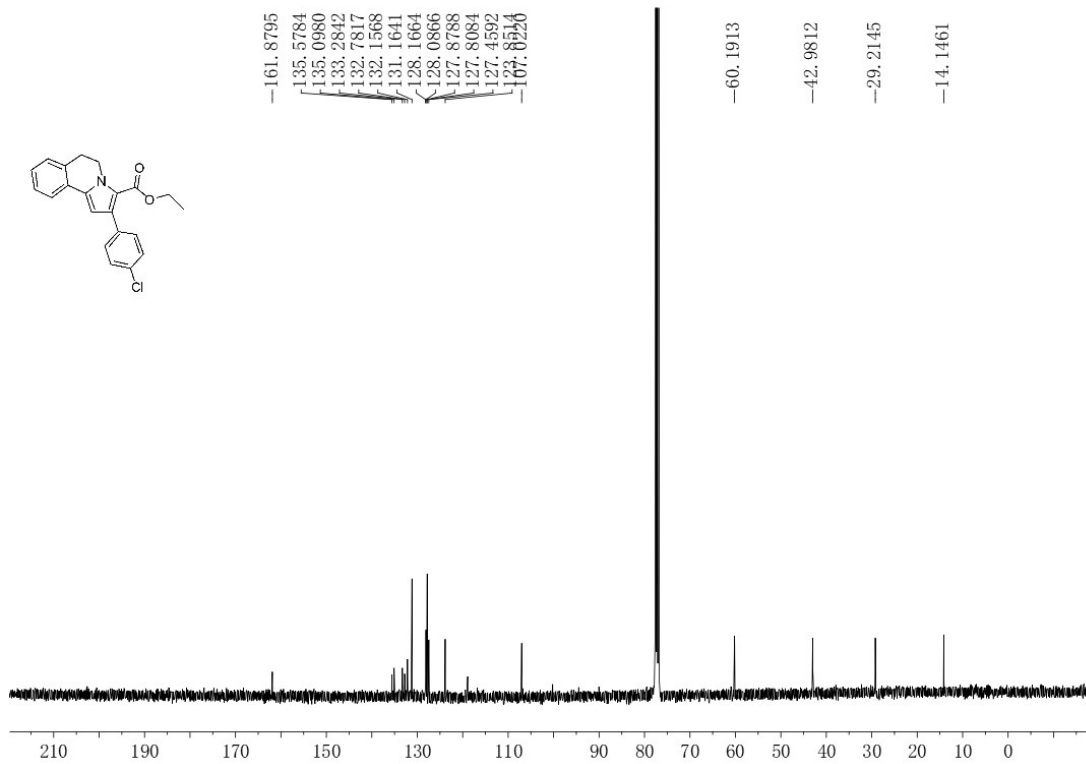

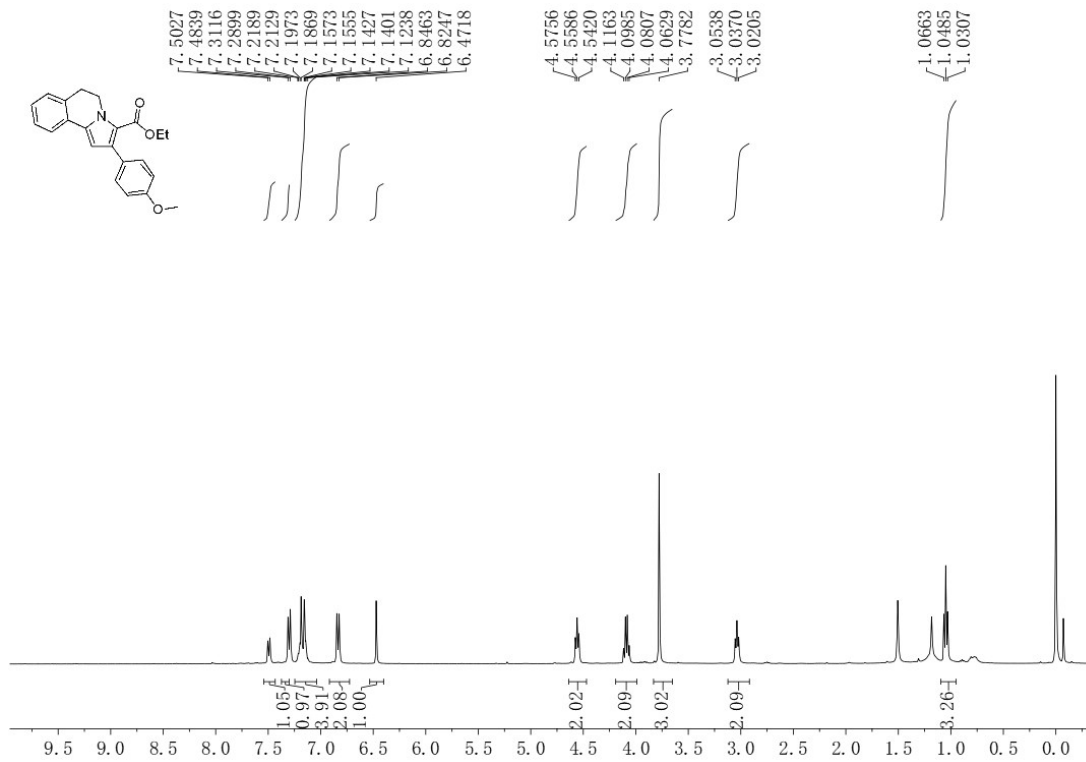

<sup>1</sup>H NMR of 5c

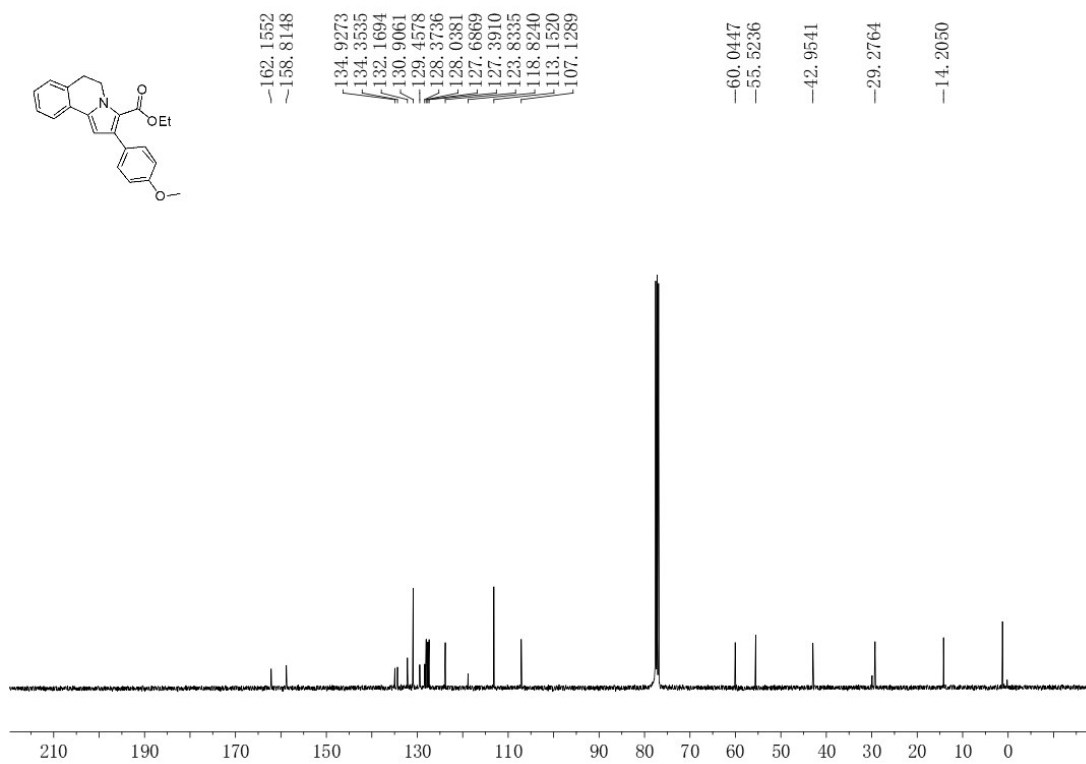

<sup>13</sup>C NMR of 5c

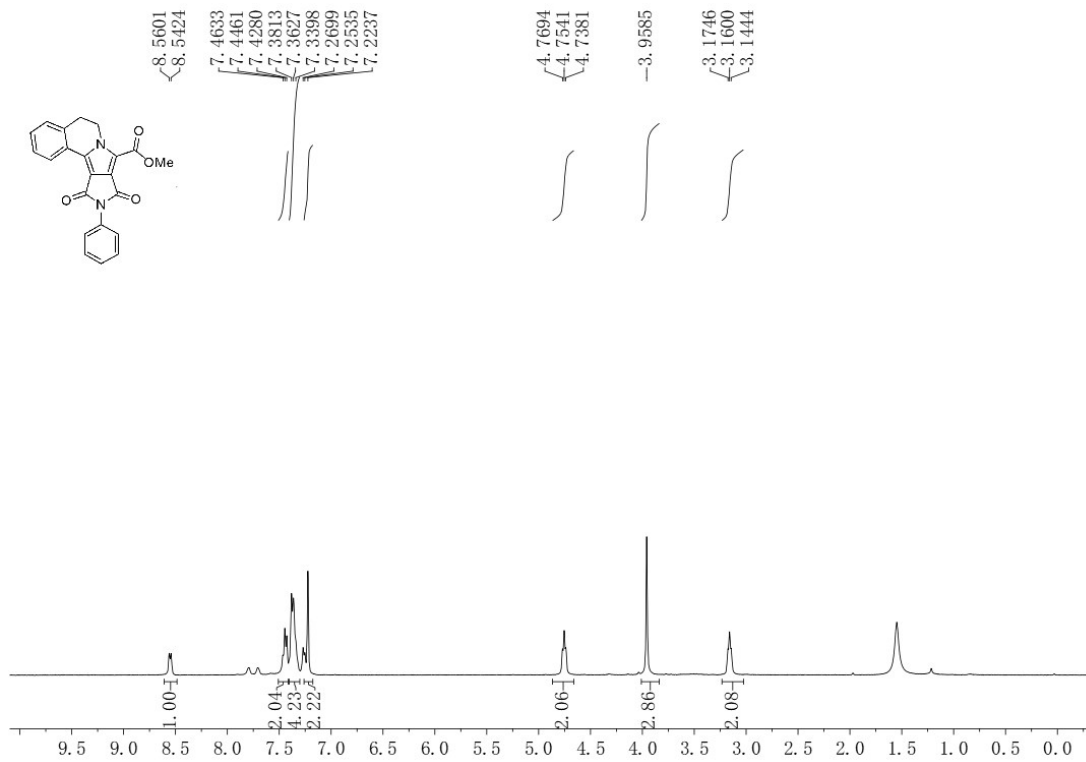

$^1\text{H NMR}$  of **6b**

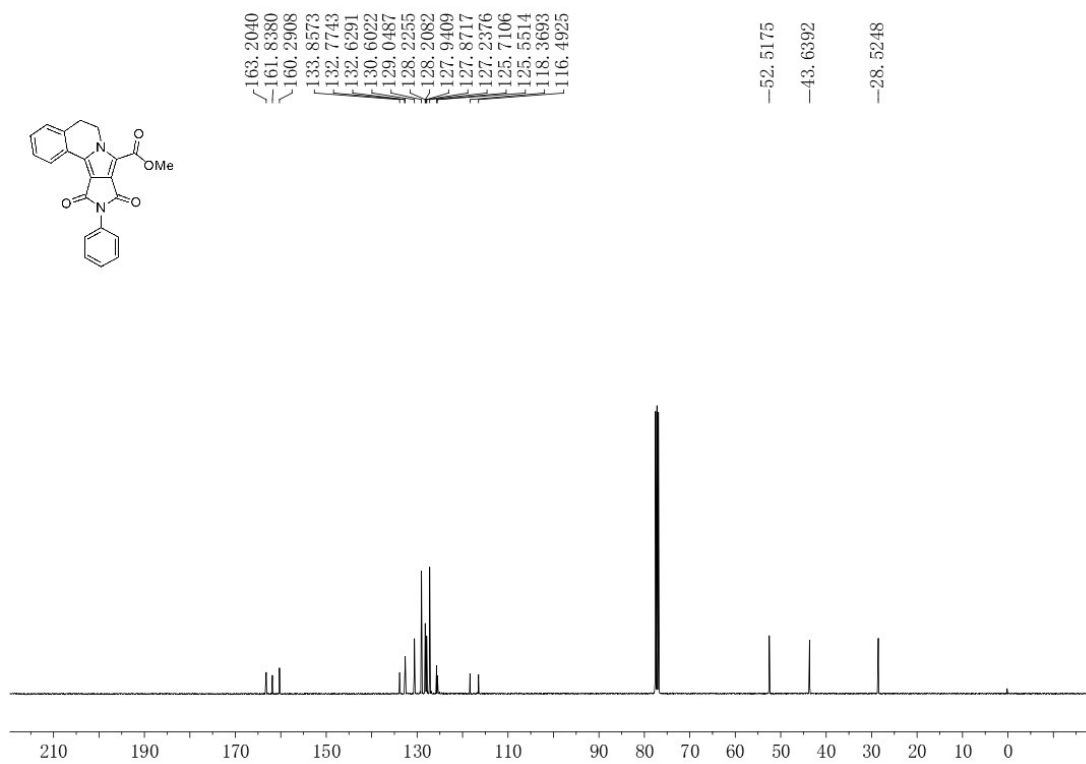

$^{13}\text{C NMR}$  of **6b**



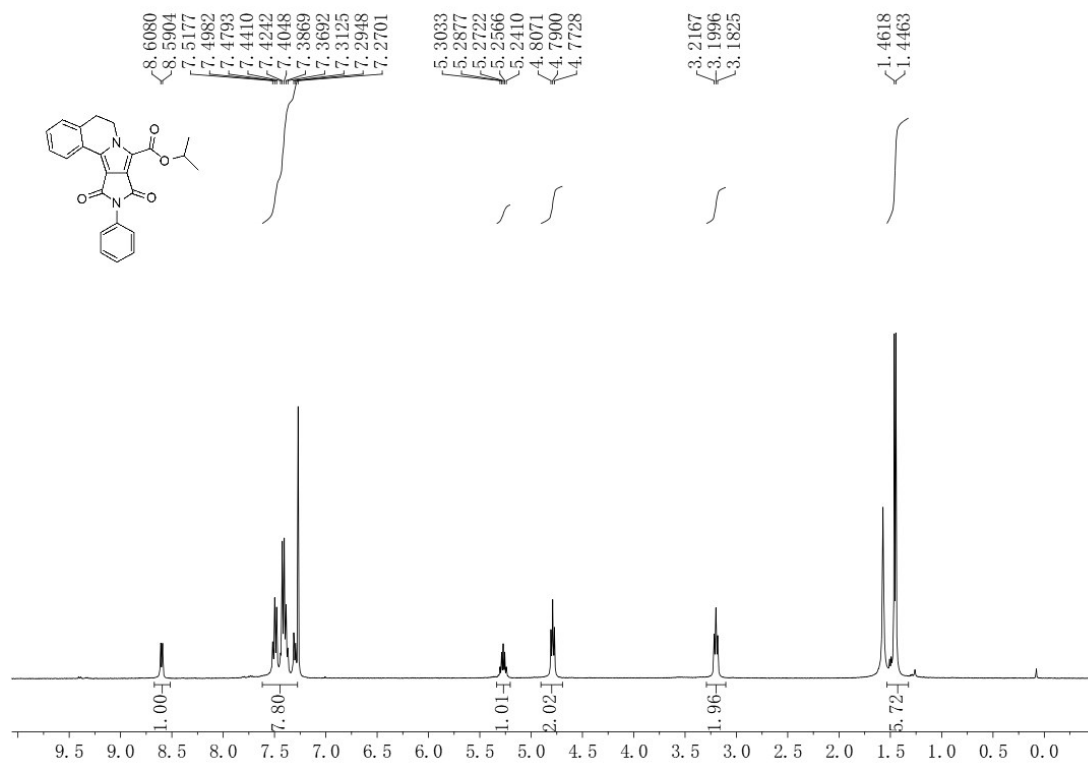

<sup>1</sup>H NMR of 6c

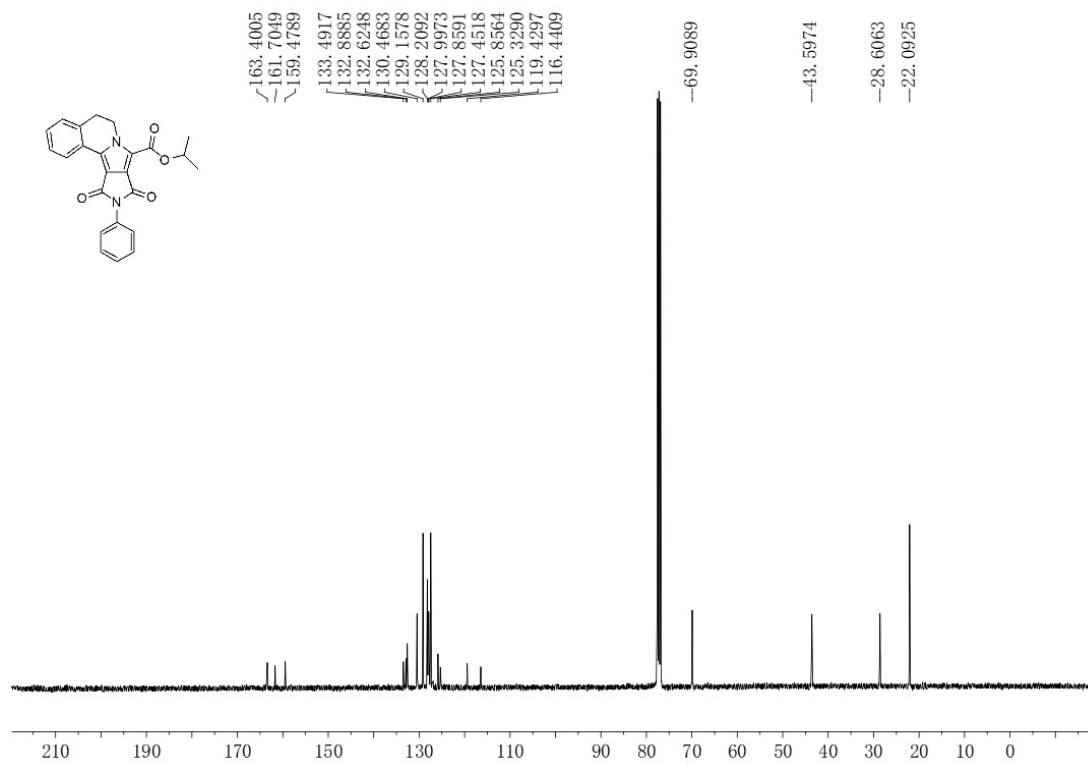

<sup>13</sup>C NMR of 6c

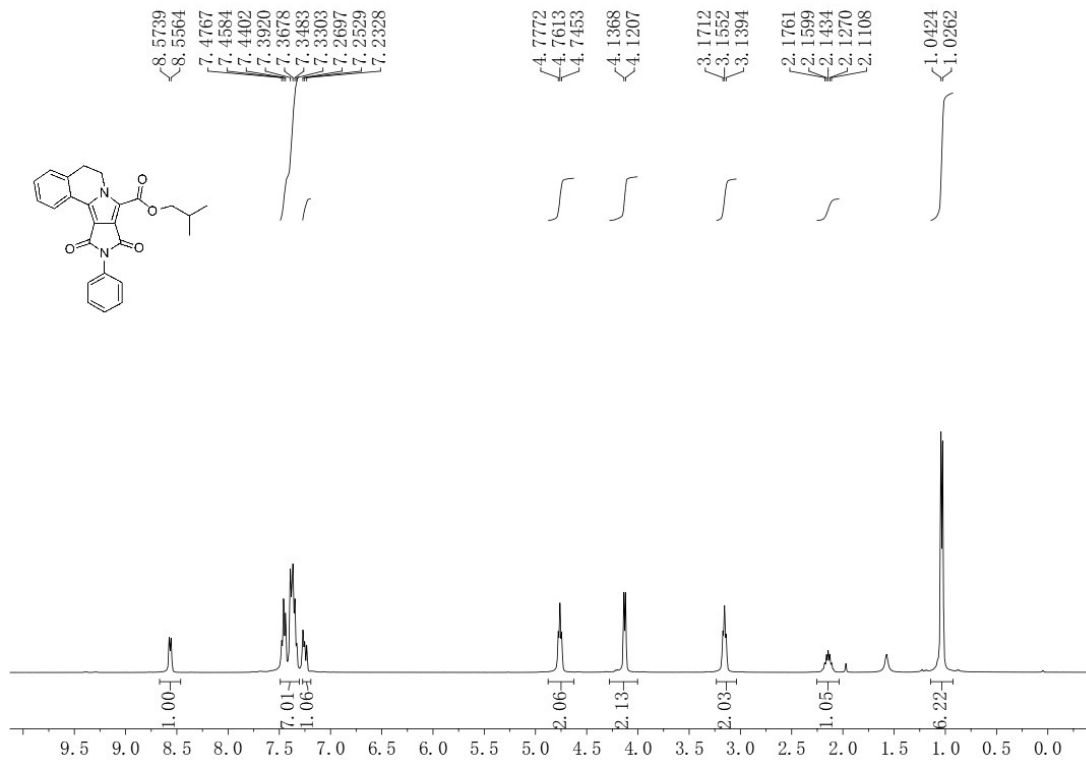

<sup>1</sup>H NMR of 6d

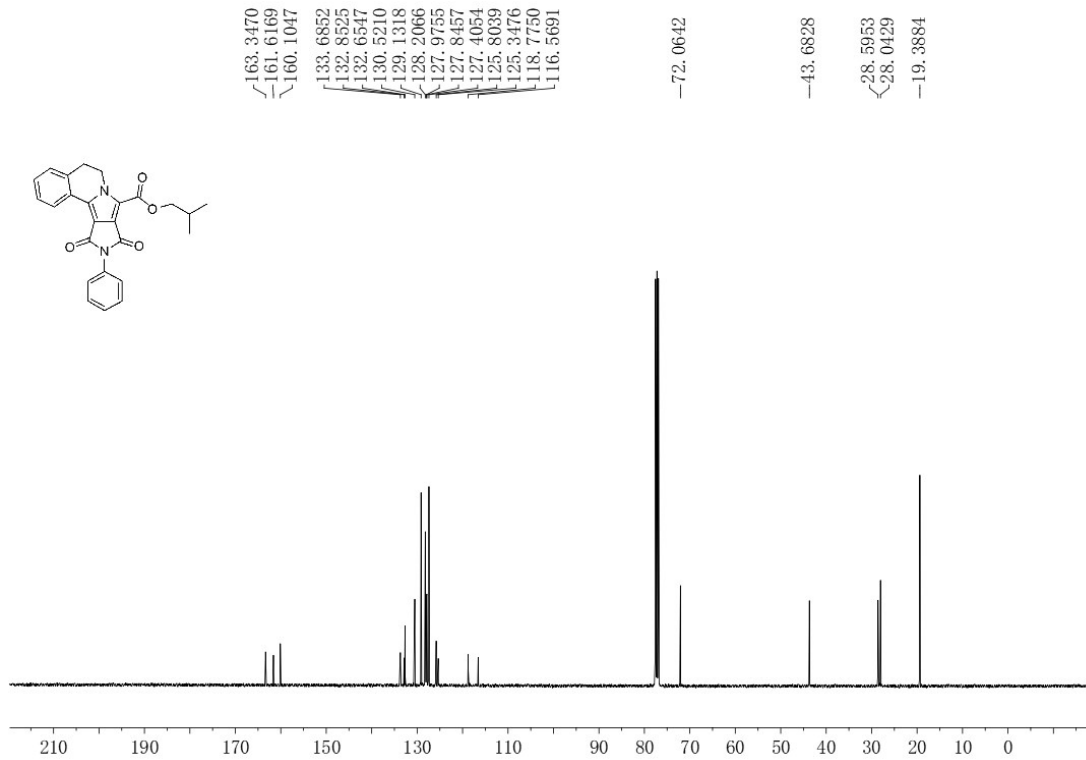

<sup>13</sup>C NMR of 6d

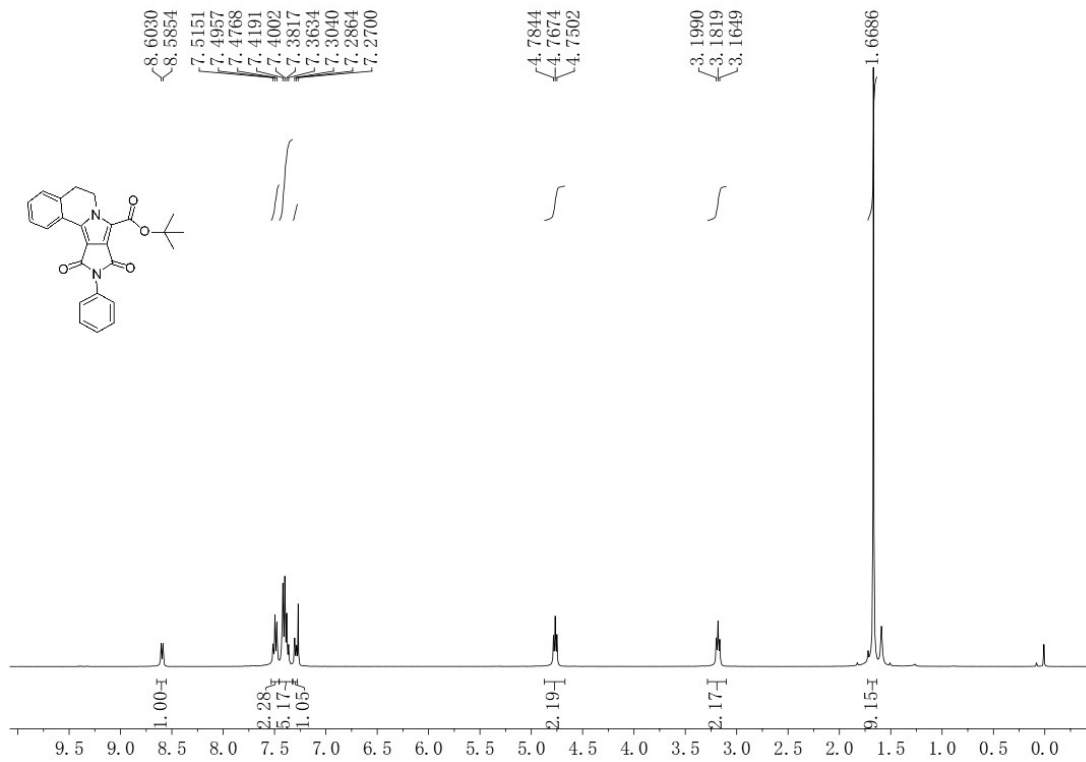

<sup>1</sup>H NMR of **6e**

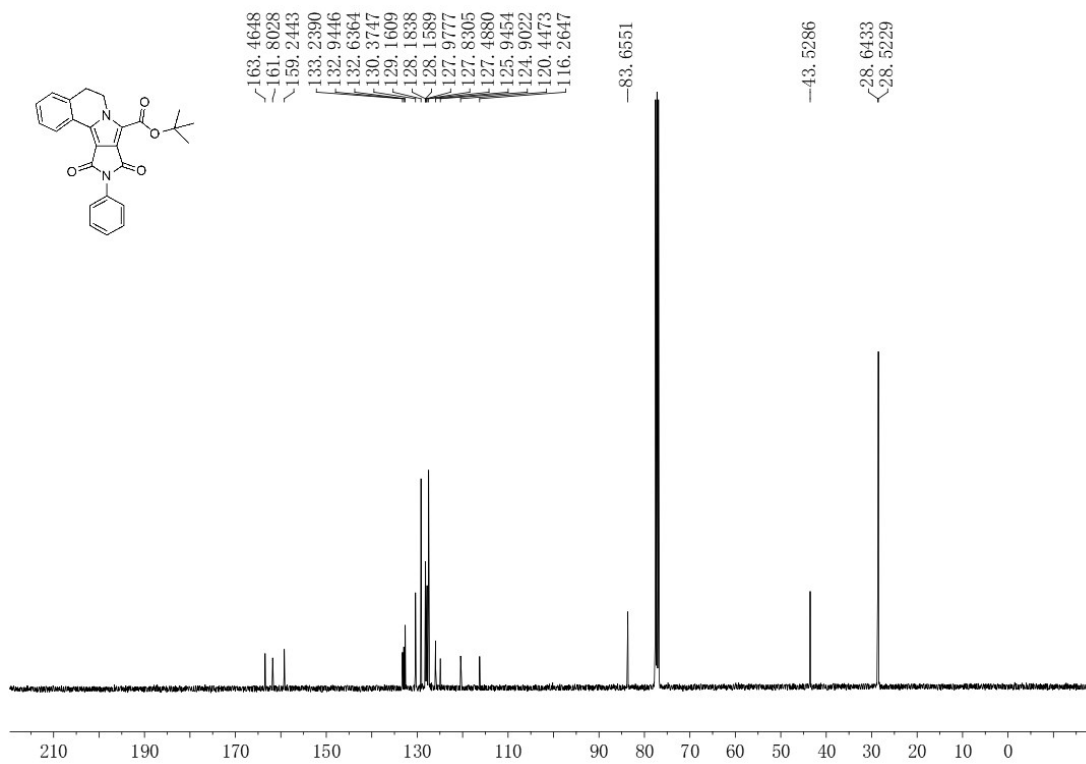

<sup>13</sup>C NMR of **6e**

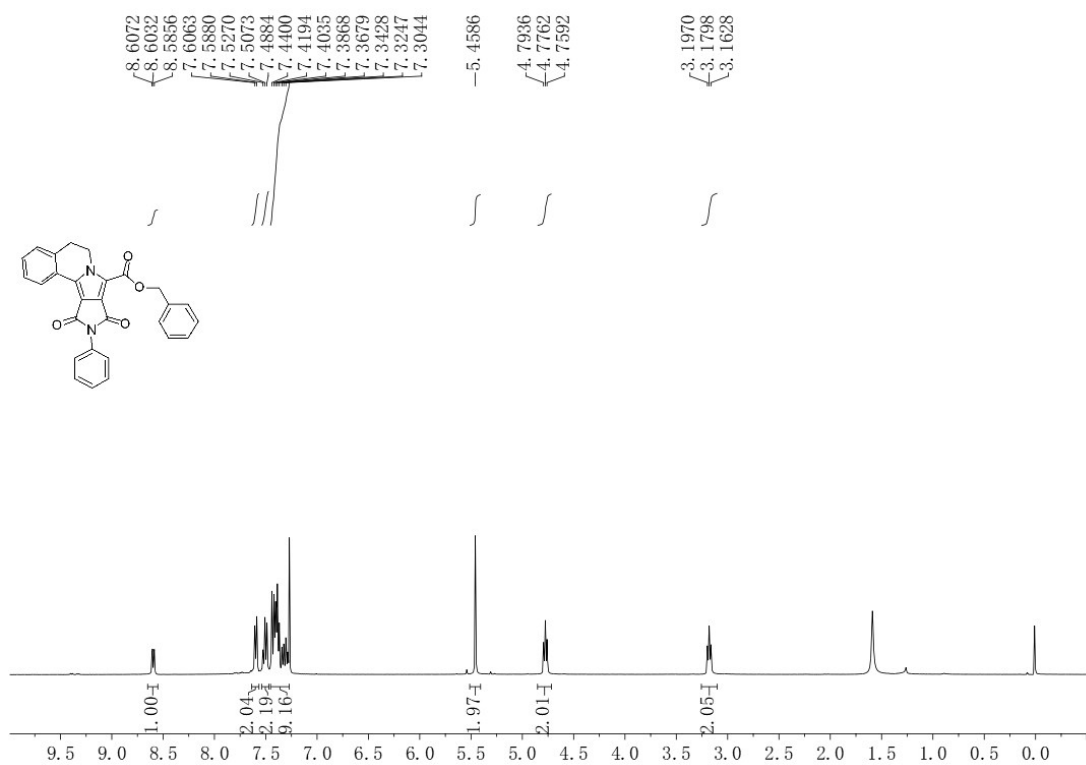

$^1\text{H NMR}$  of 6f

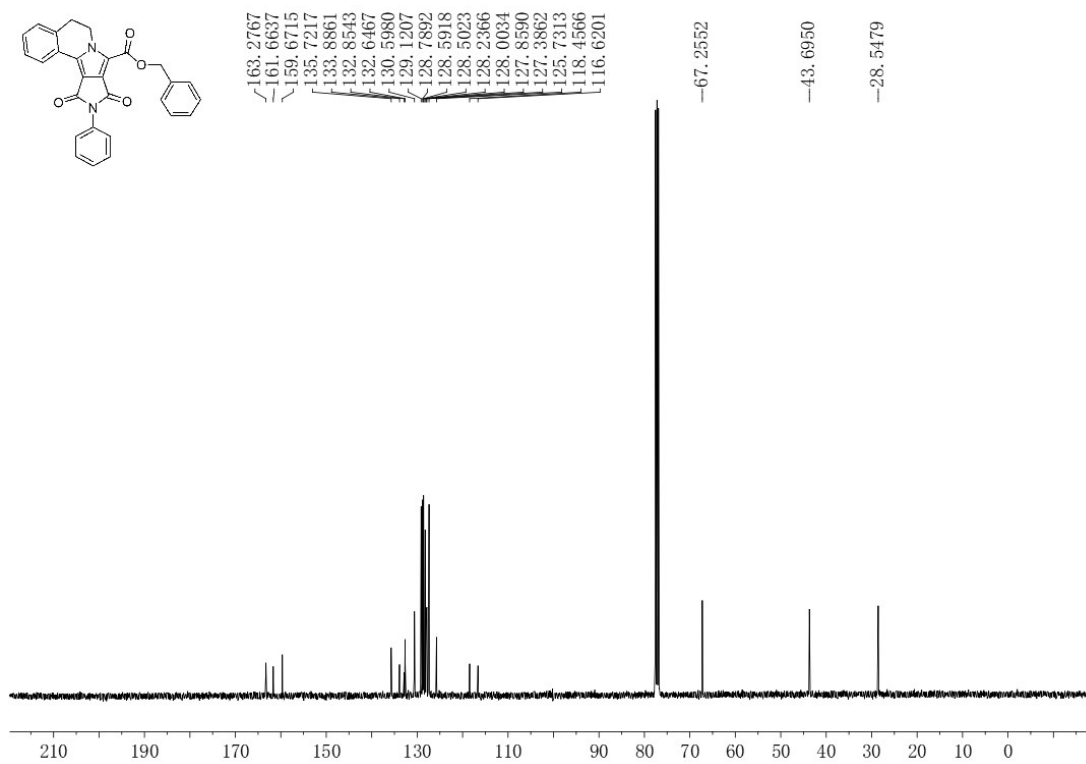

$^{13}\text{C NMR}$  of 6f

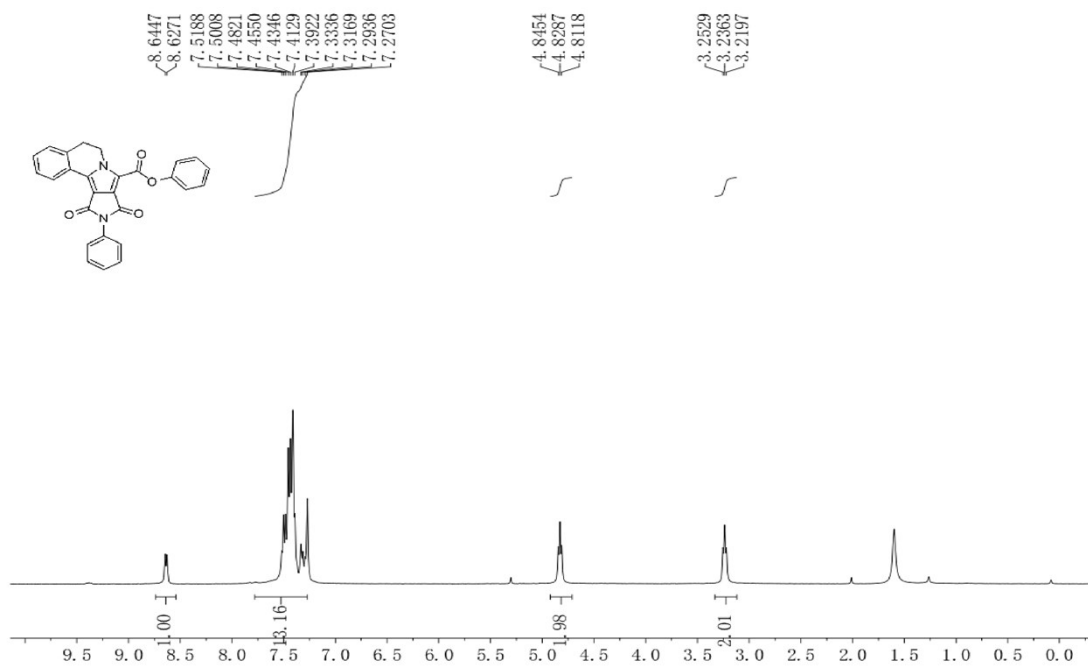

$^1\text{H NMR}$  of **6g**

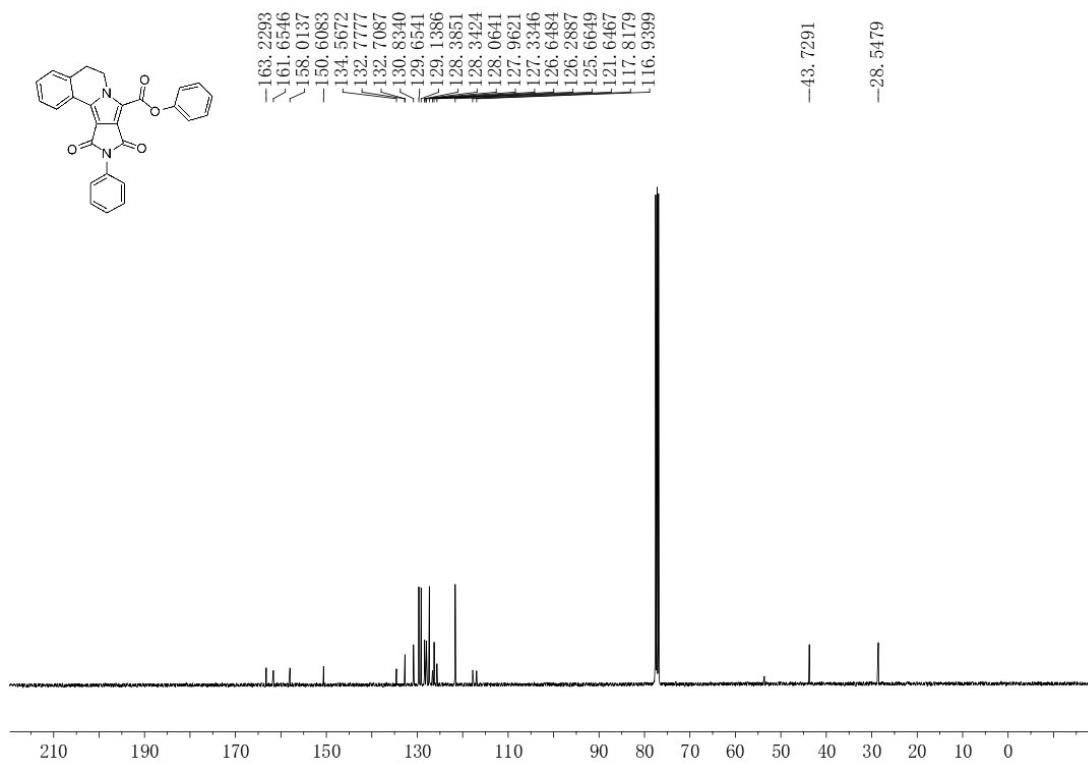

$^{13}\text{C NMR}$  of **6g**

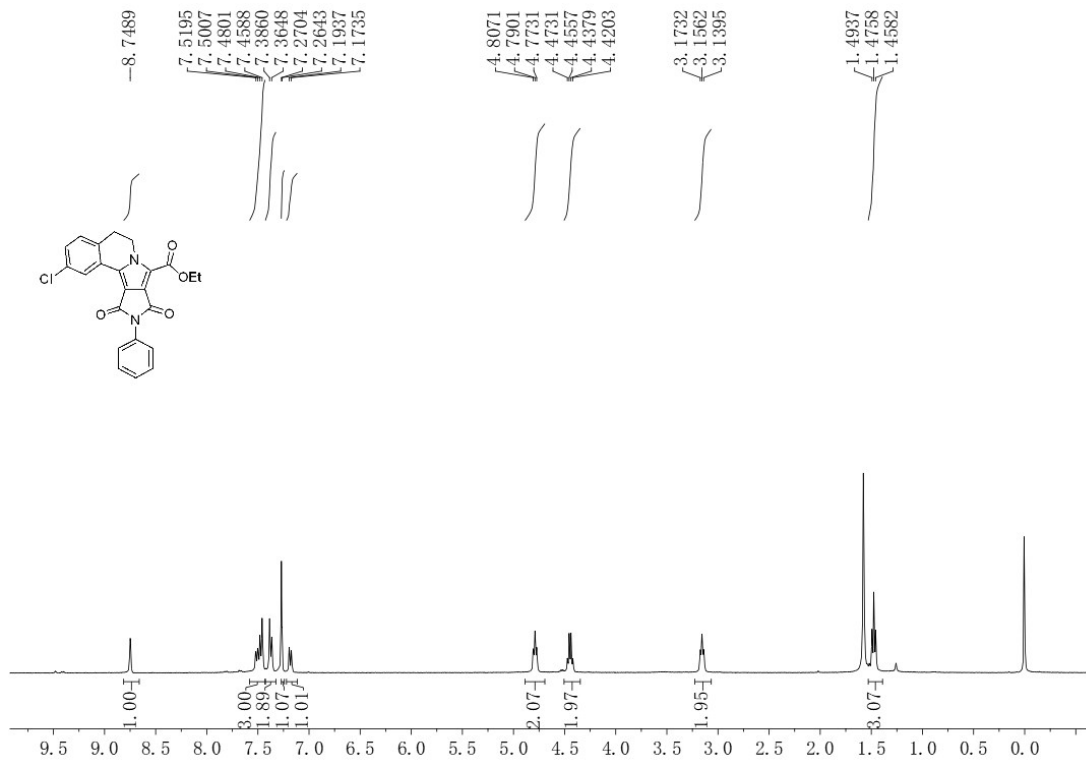

**<sup>1</sup>H NMR of 6h**

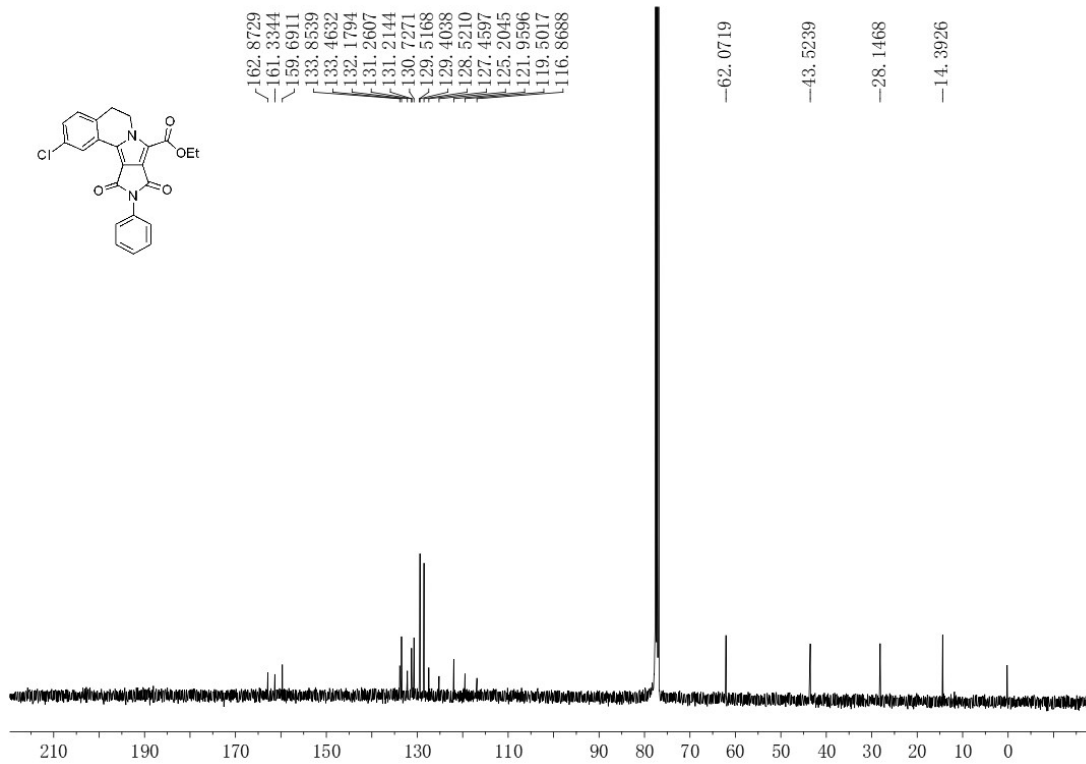

**<sup>13</sup>C NMR of 6h**

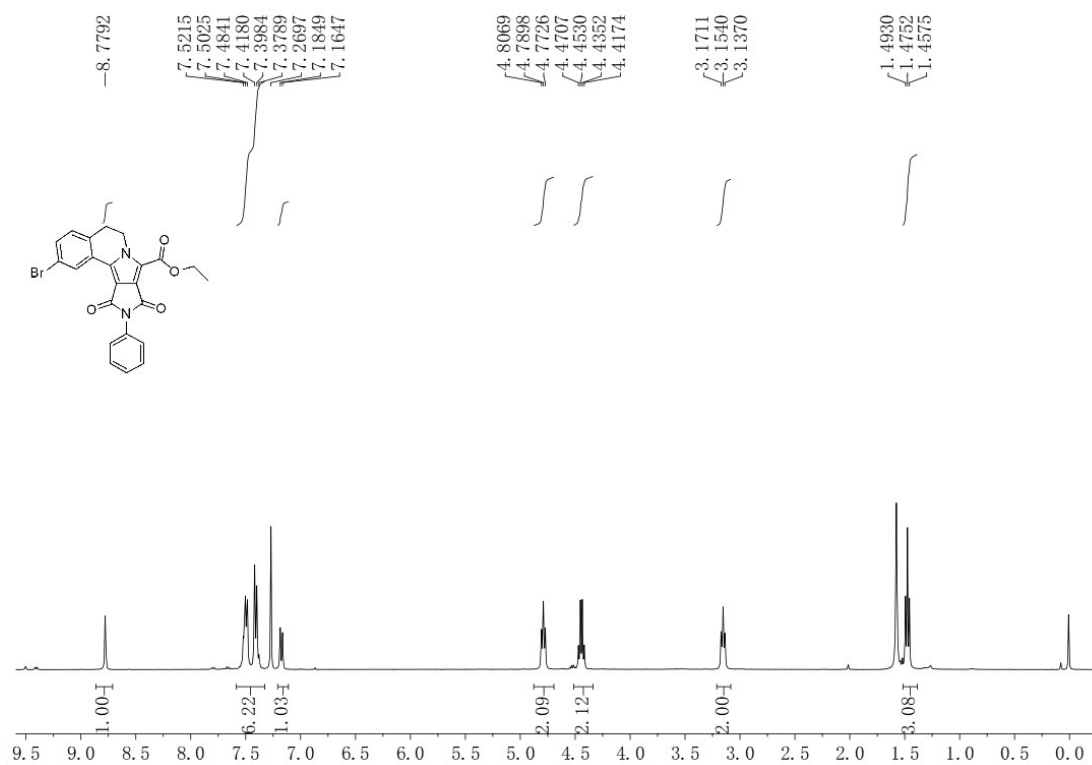

<sup>1</sup>H NMR of **6ia**

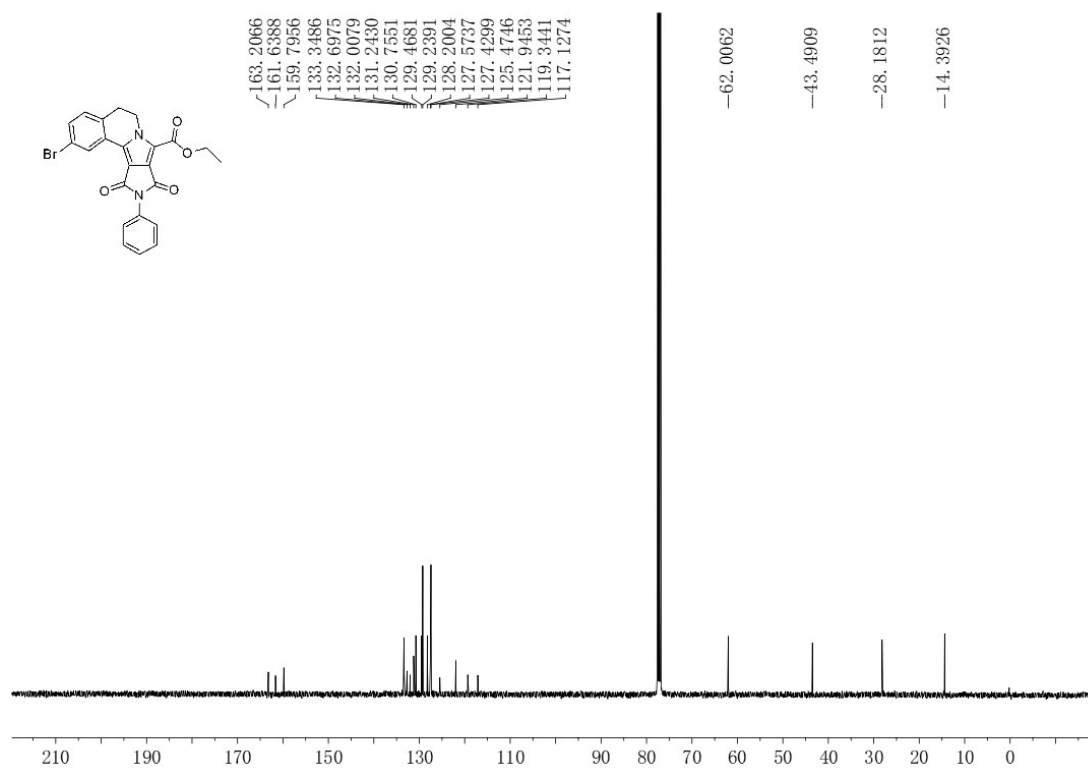

<sup>13</sup>C NMR of **6ia**

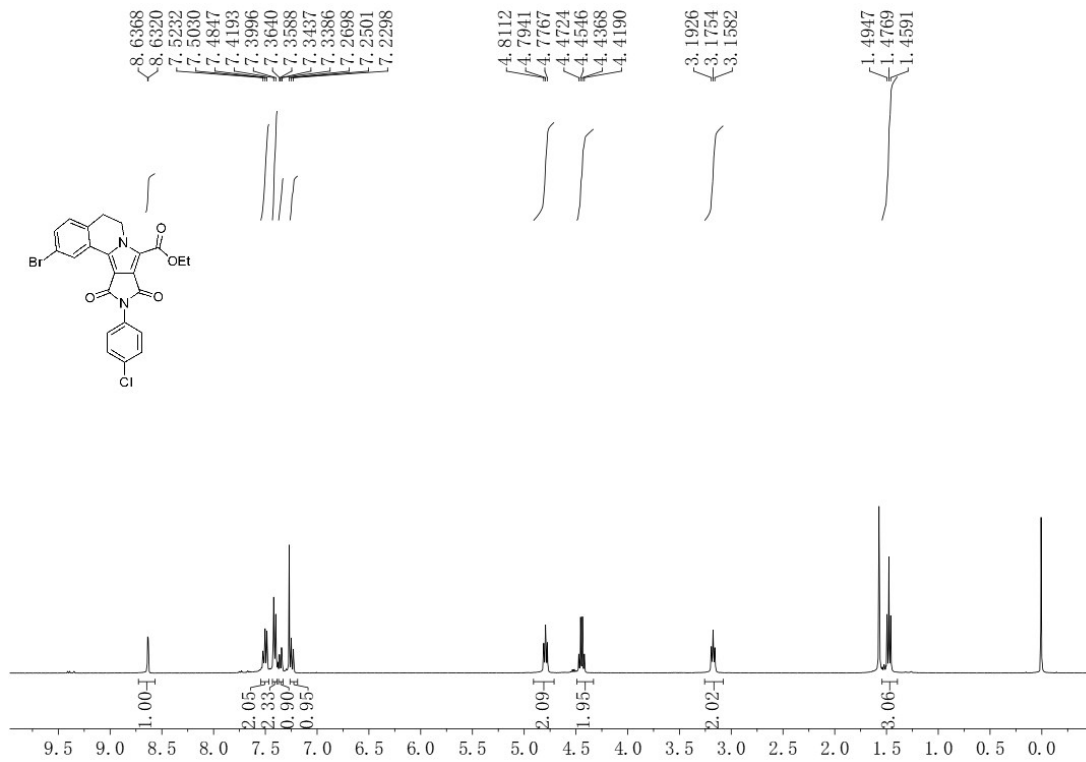

**<sup>1</sup>H NMR of 6ib**

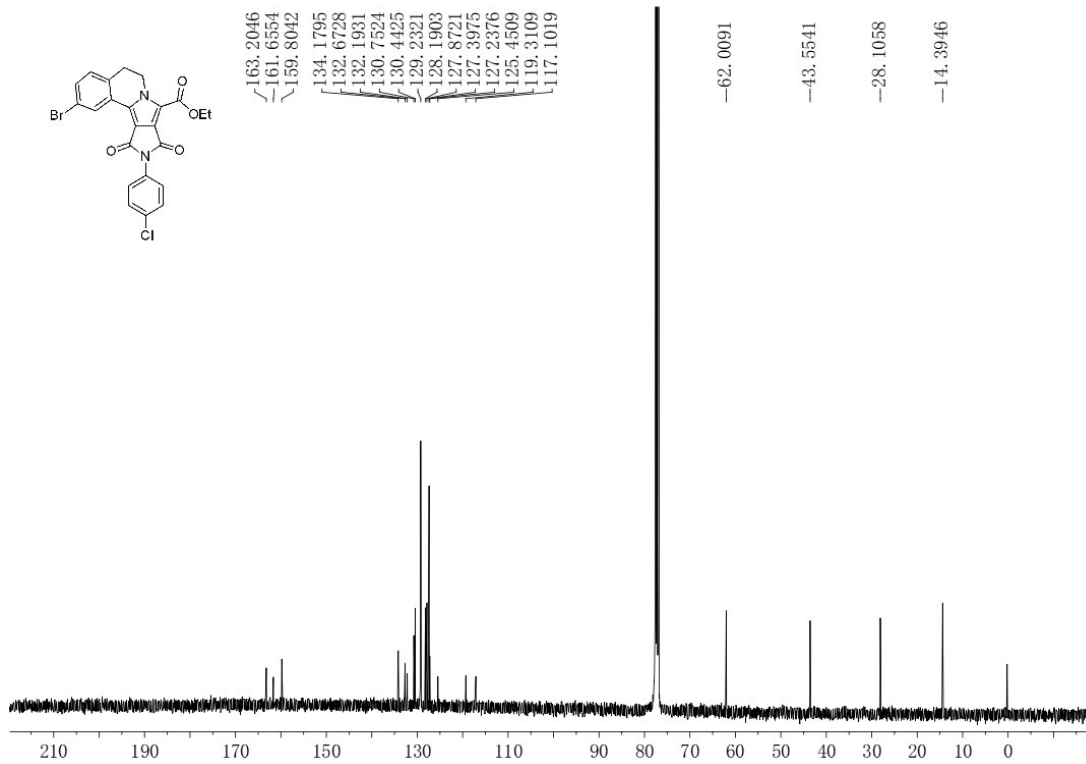

**<sup>13</sup>C NMR of 6ib**



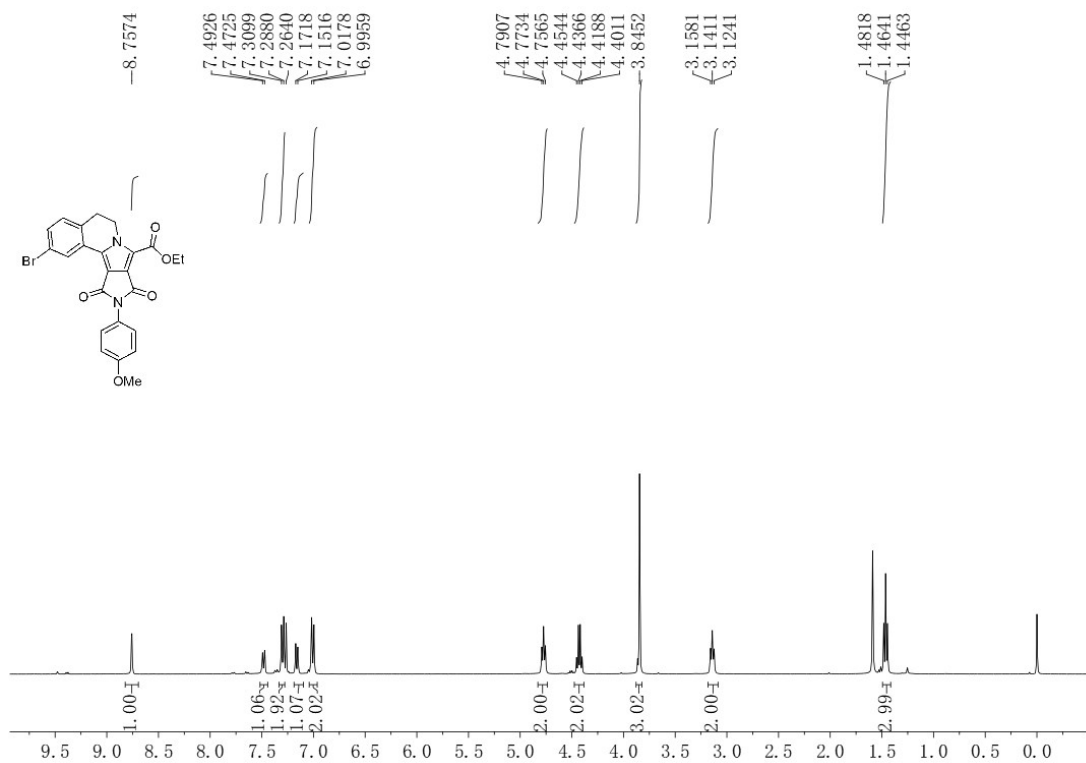

**<sup>1</sup>H NMR of 6ic**

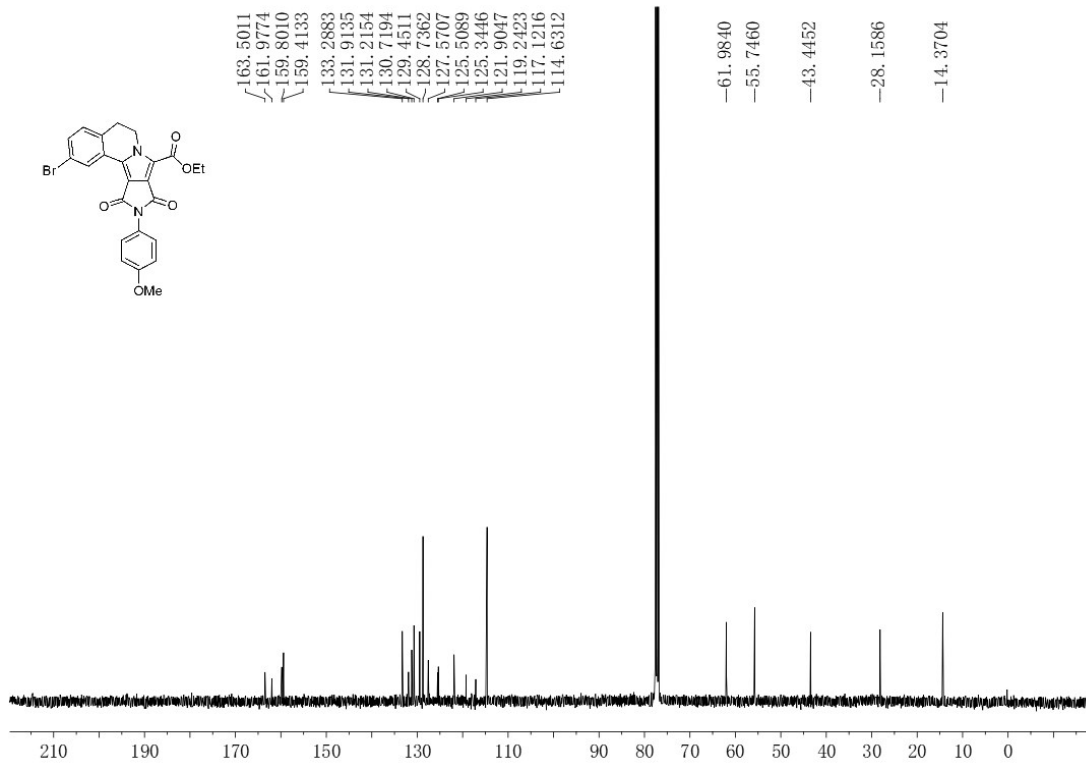

**<sup>13</sup>C NMR of 6ic**

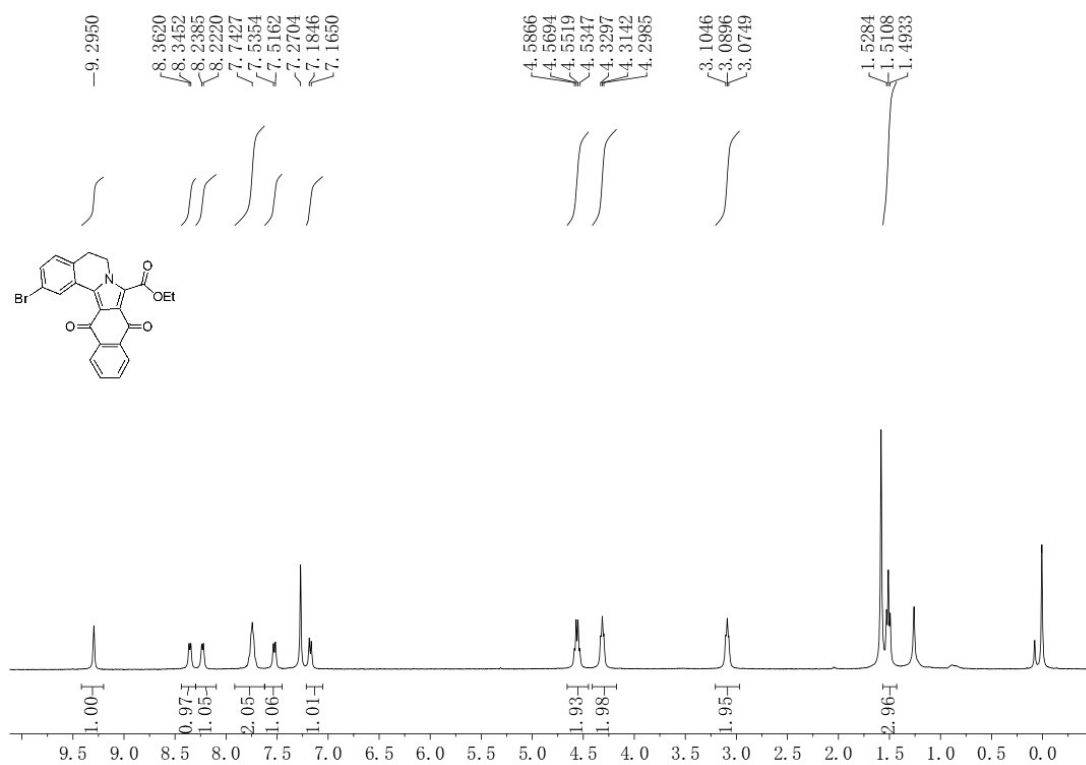

<sup>1</sup>H NMR of **6id**

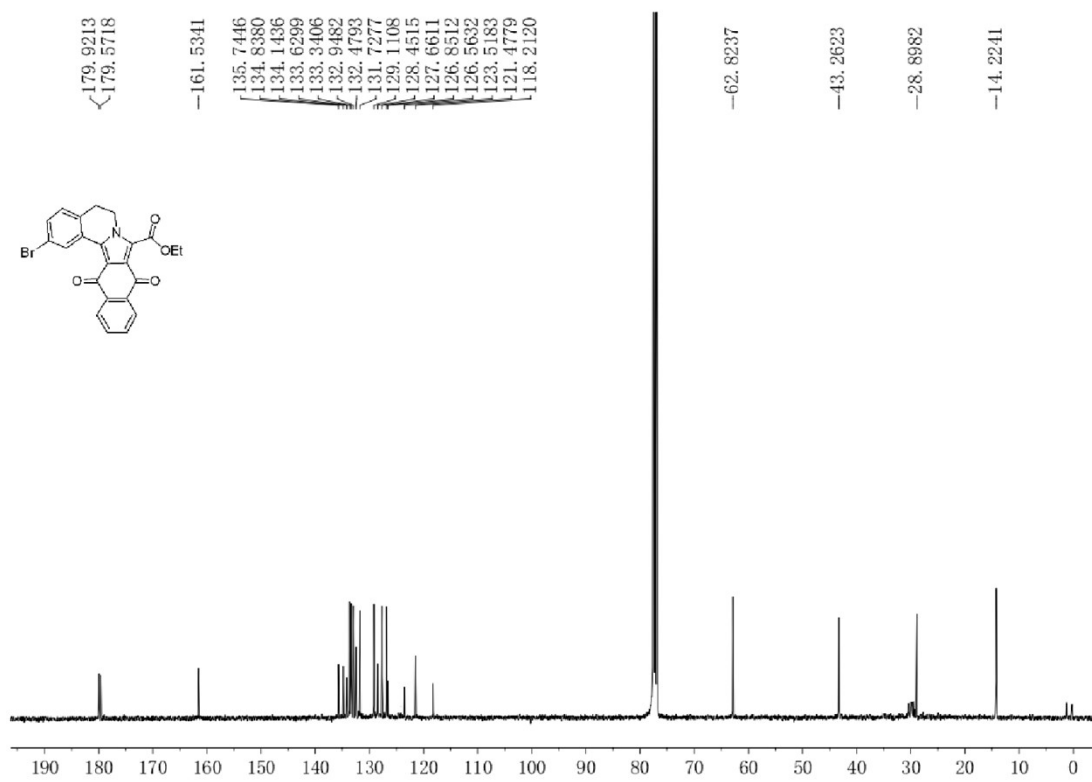

<sup>13</sup>C NMR of **6id**

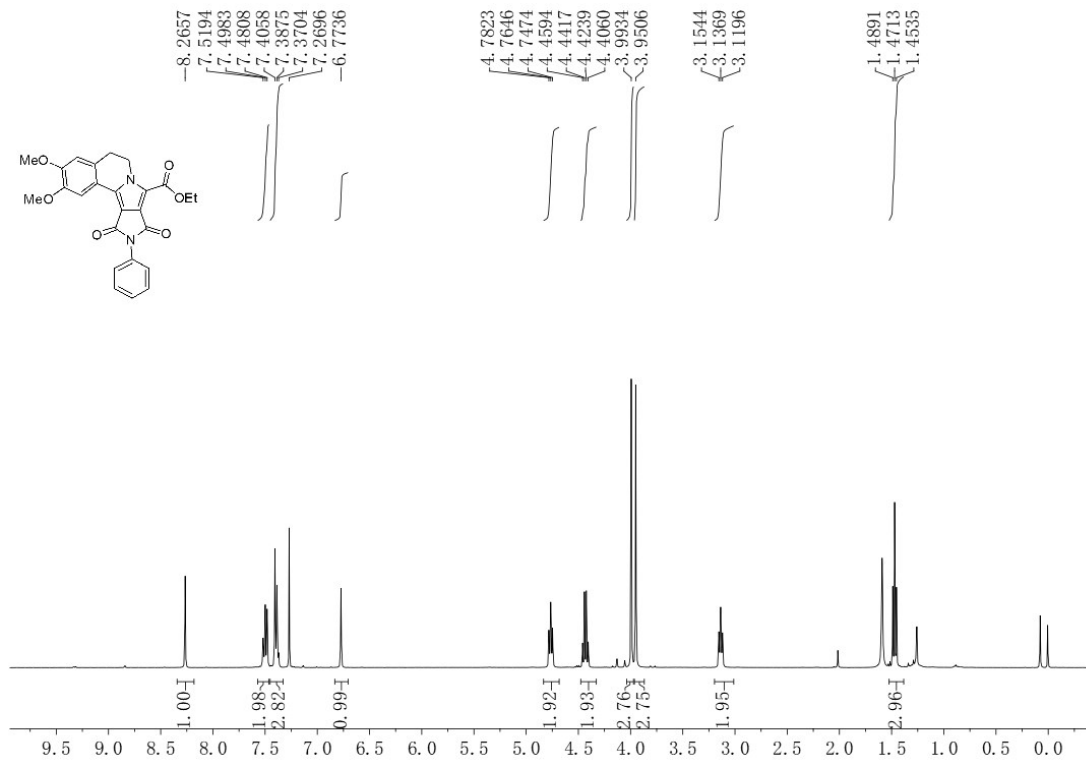

**<sup>1</sup>H NMR of 6ja**

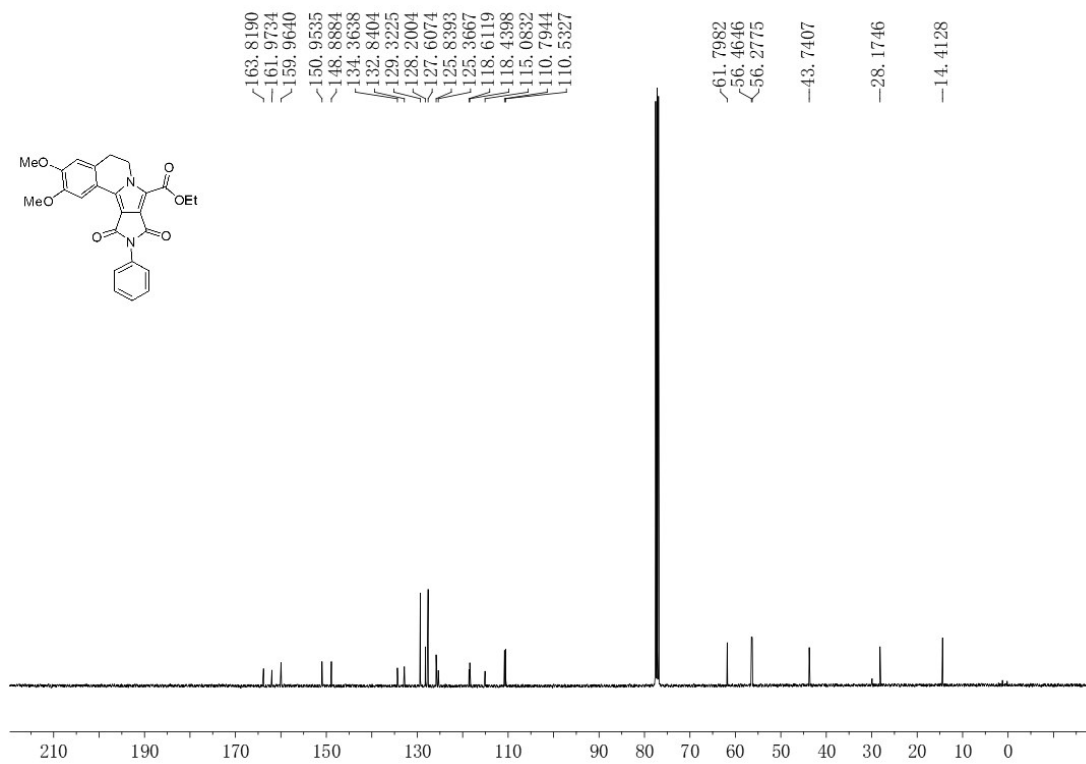

**<sup>13</sup>C NMR of 6ja**

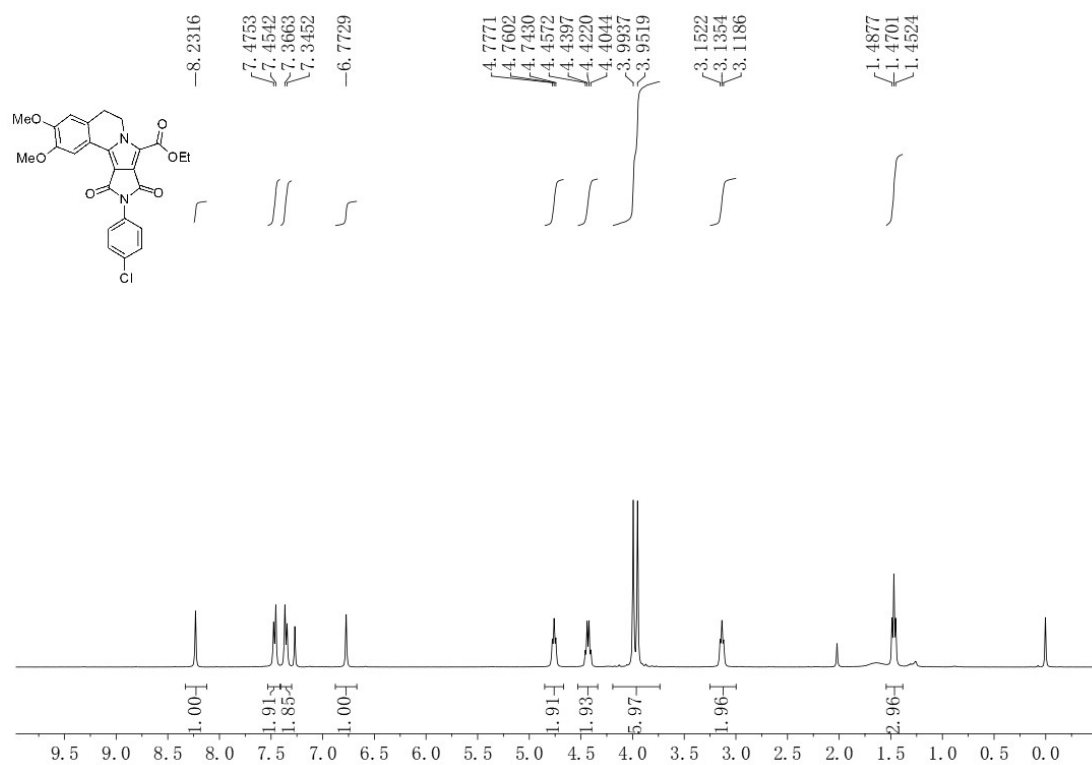

**<sup>1</sup>H NMR of 6jb**

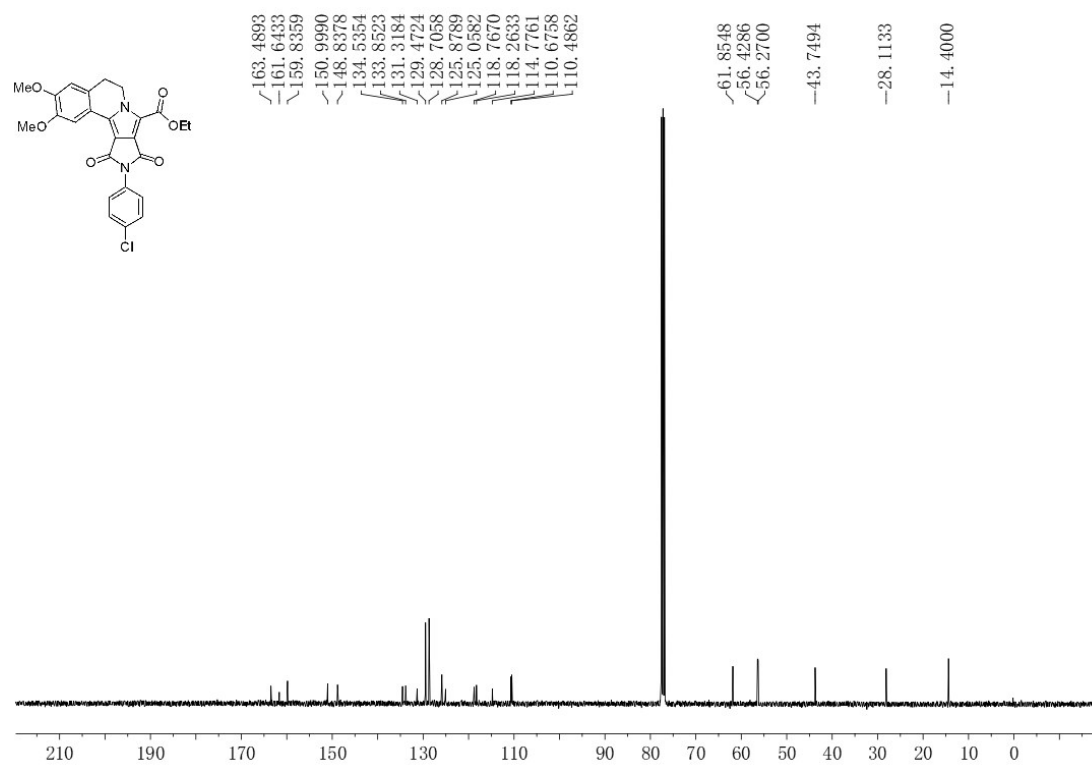

**<sup>13</sup>C NMR of 6jb**

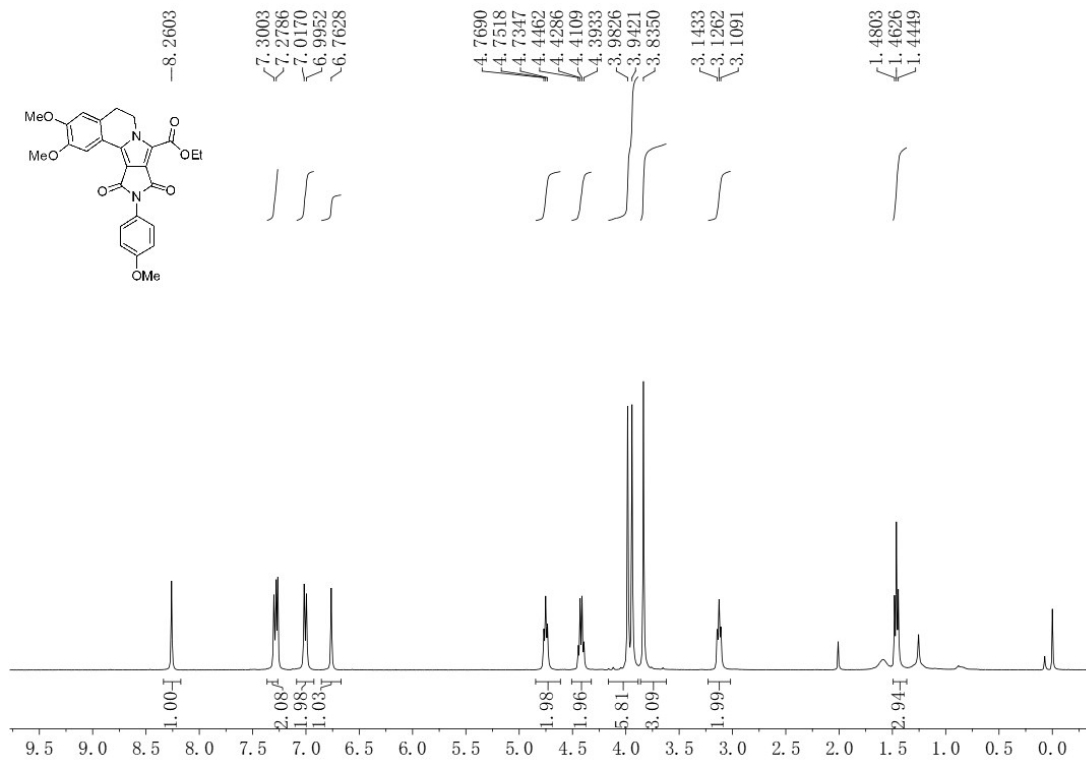

**<sup>1</sup>H NMR of 6jc**

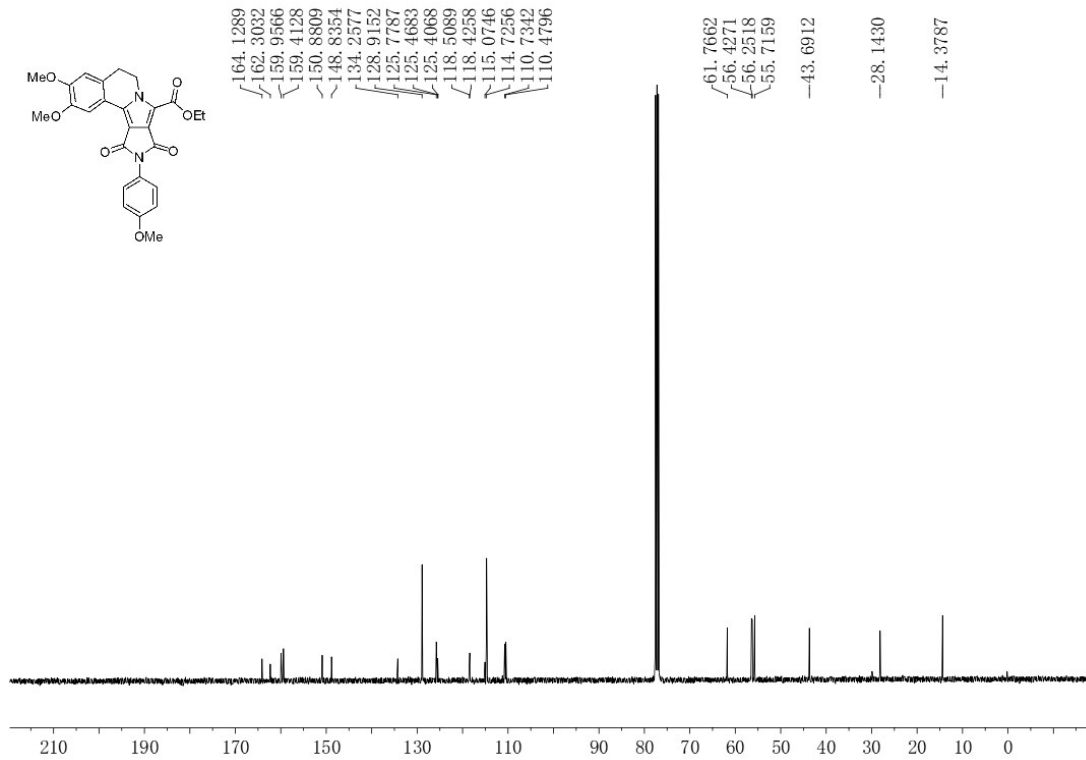

**<sup>13</sup>C NMR of 6jc**

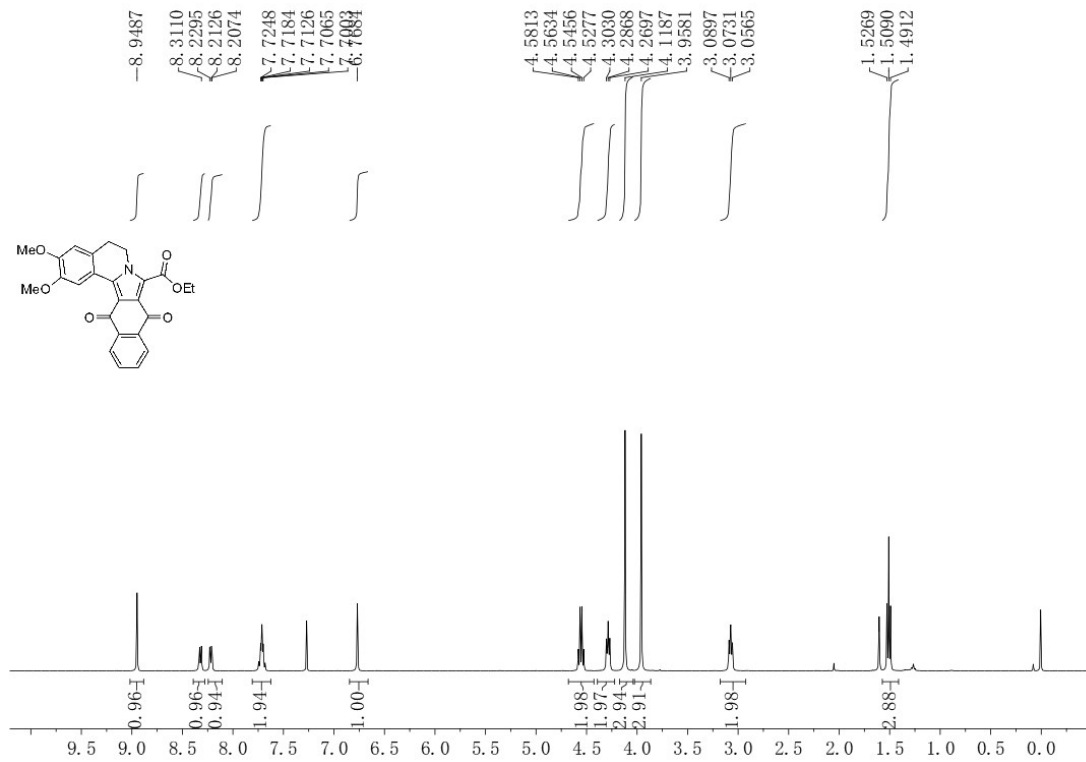

<sup>1</sup>H NMR of 6jd

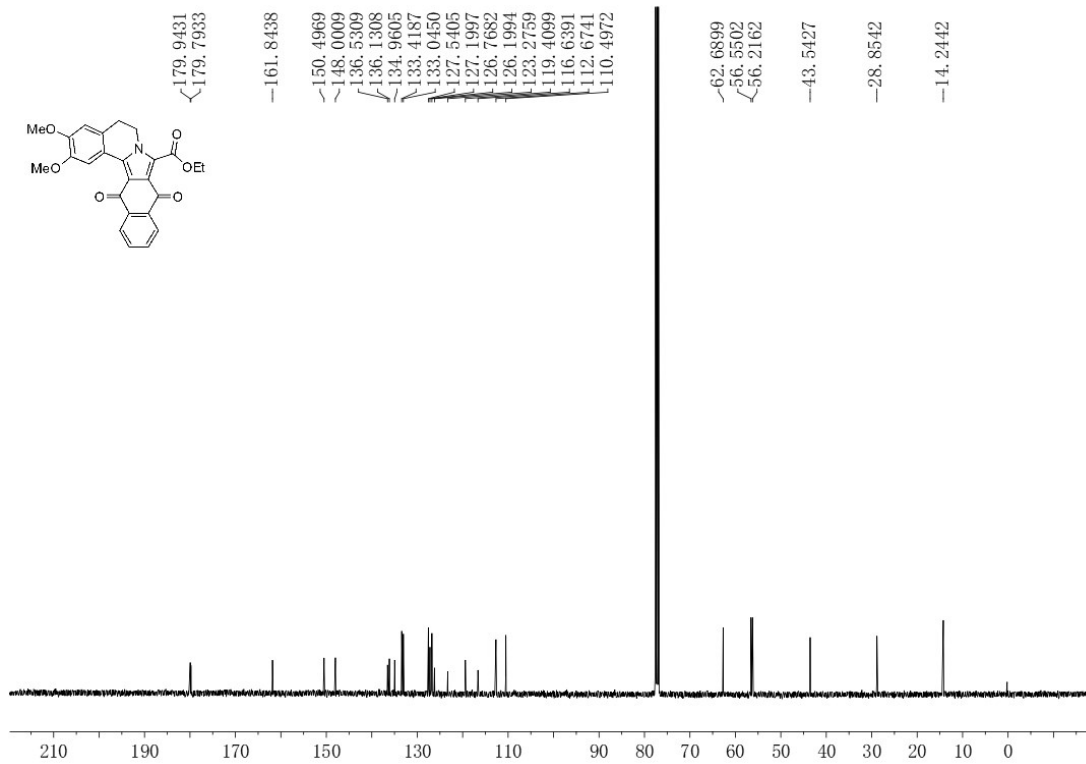

<sup>13</sup>C NMR of 6jd

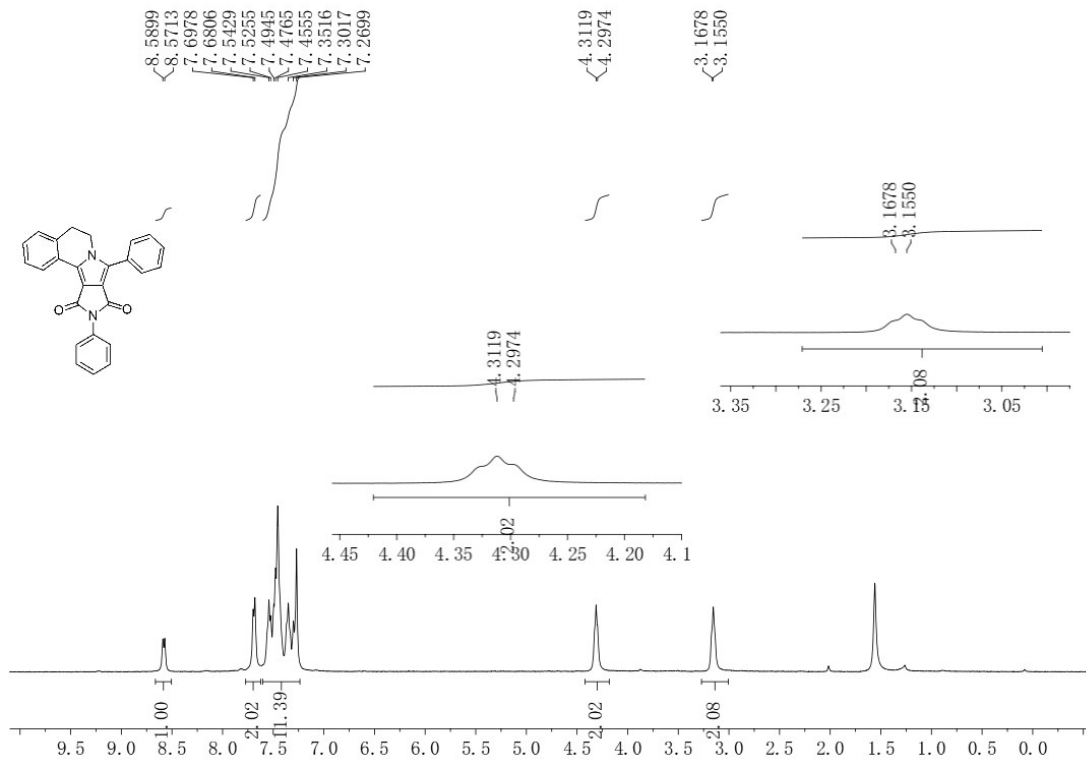

$^1\text{H NMR}$  of **6ka**

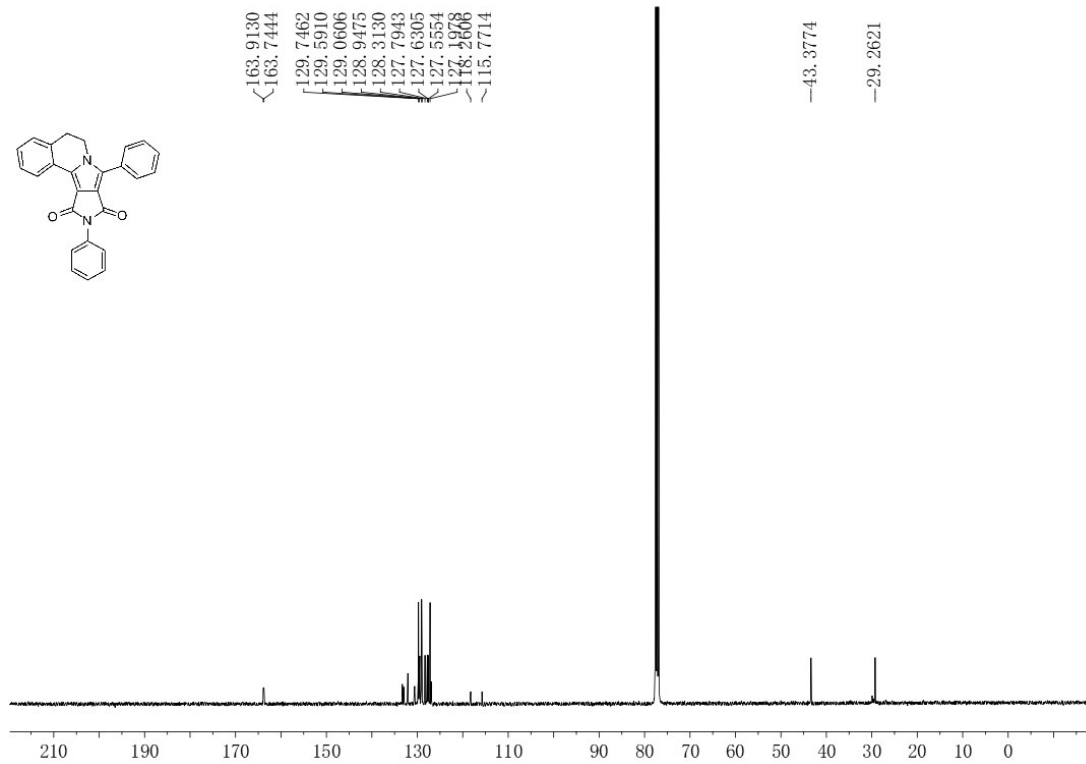

$^{13}\text{C NMR}$  of **6ka**

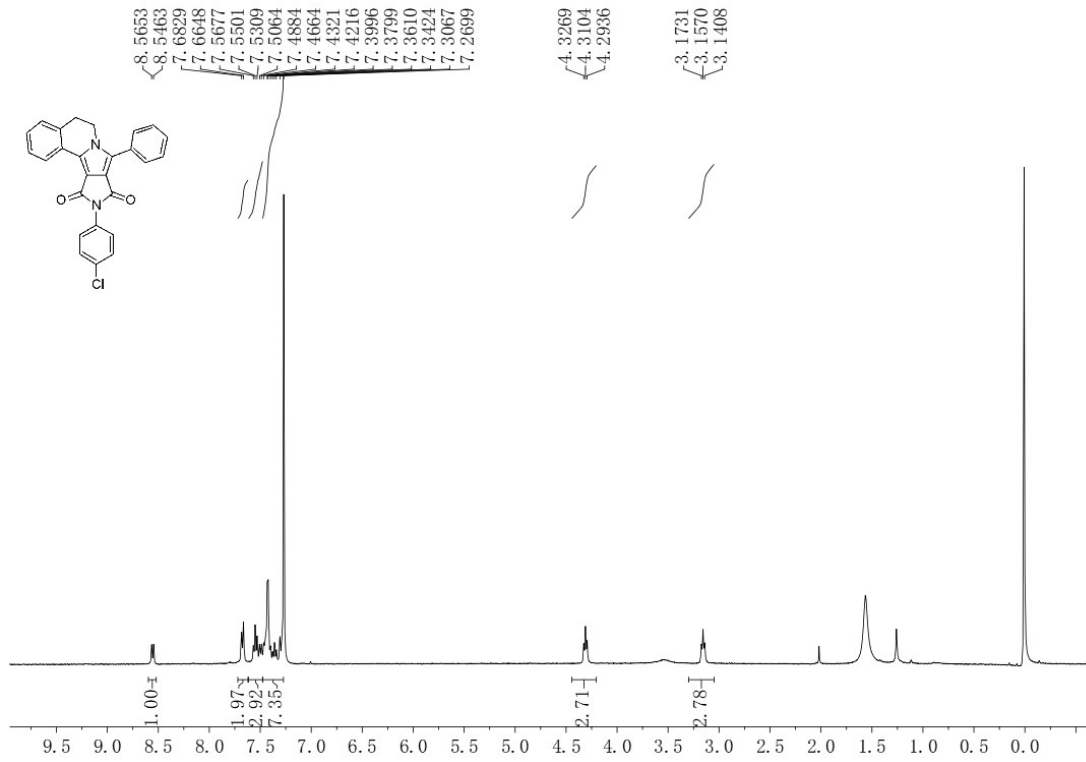

<sup>1</sup>H NMR of 6kb

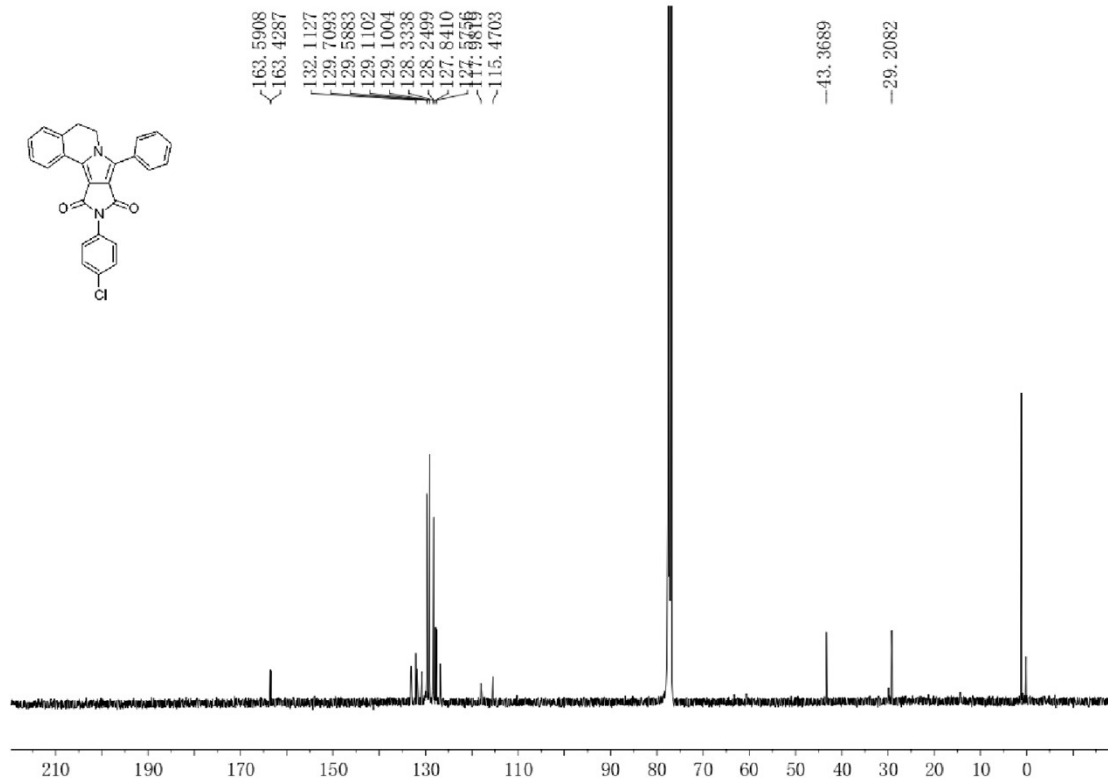

<sup>13</sup>C NMR of 6kb



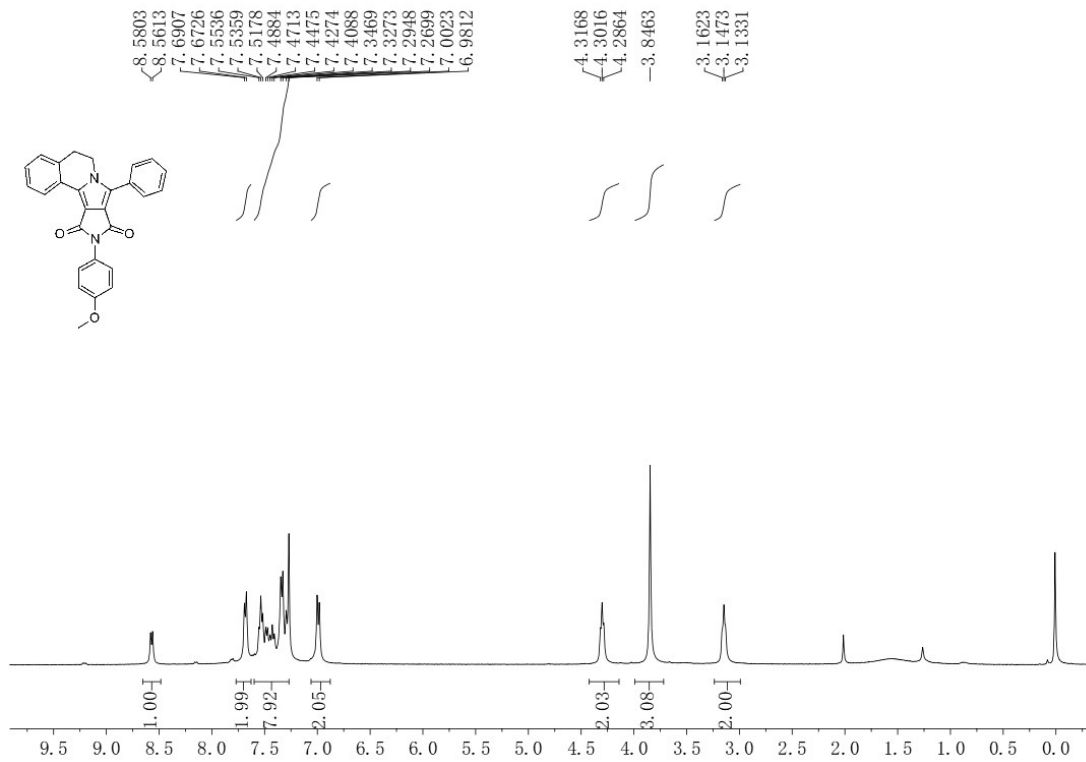

<sup>1</sup>H NMR of 6kc

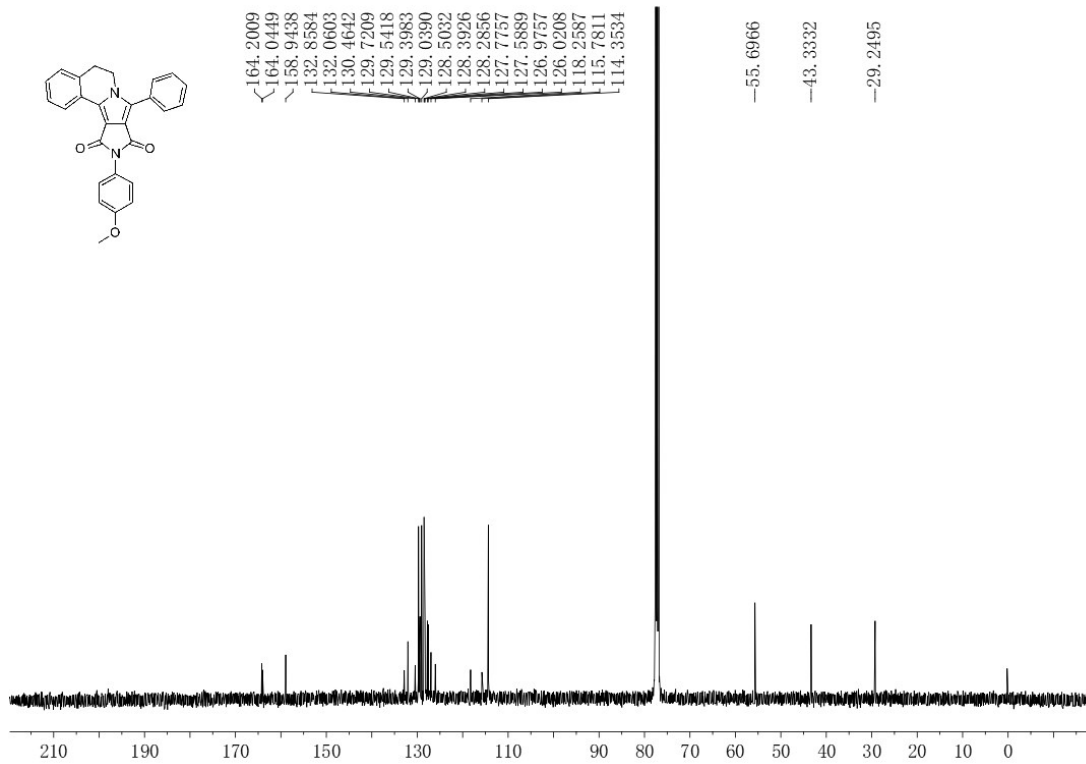

<sup>13</sup>C NMR of 6kc

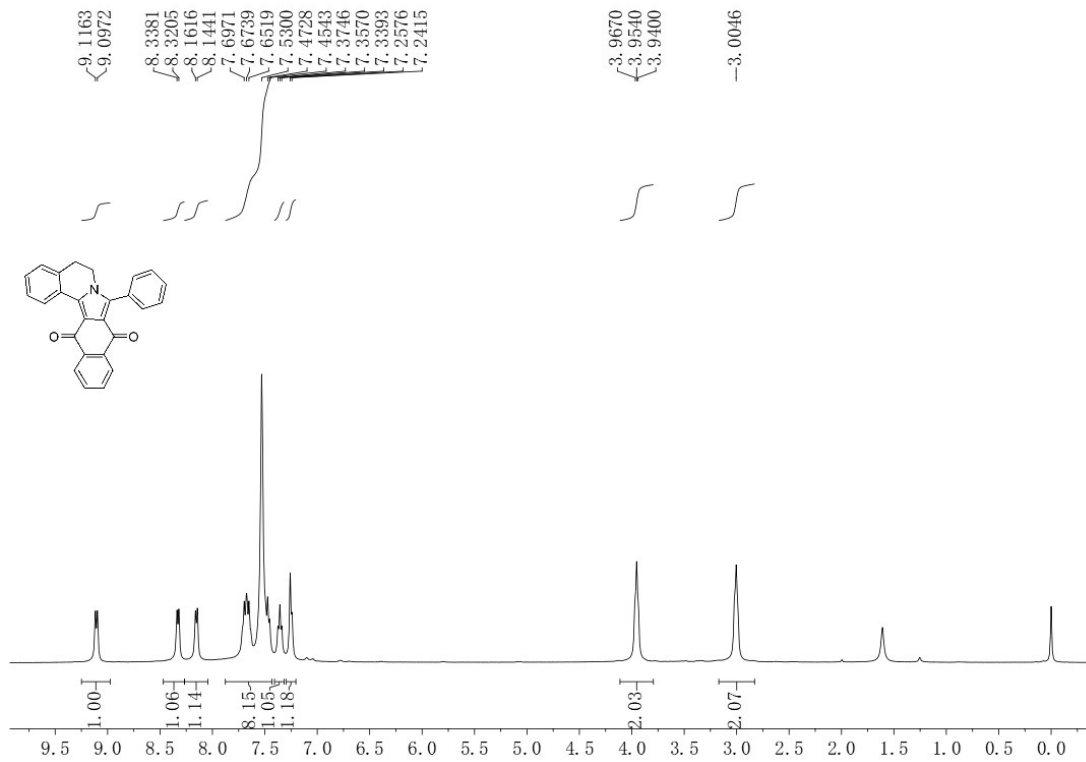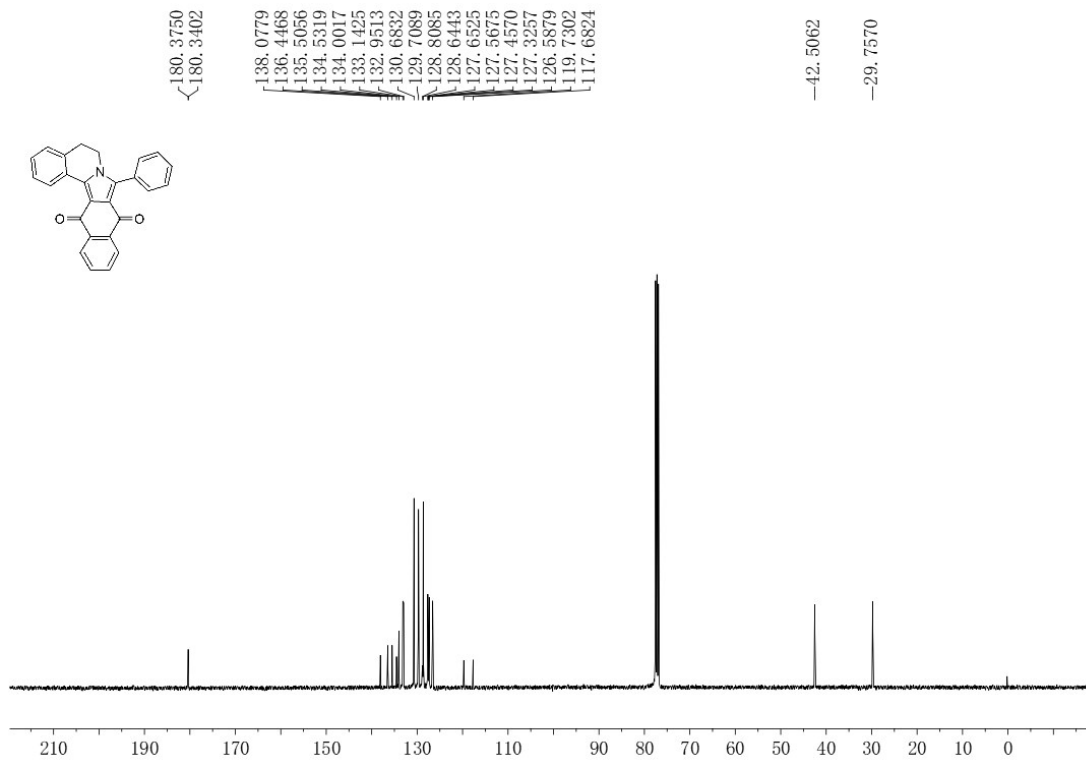

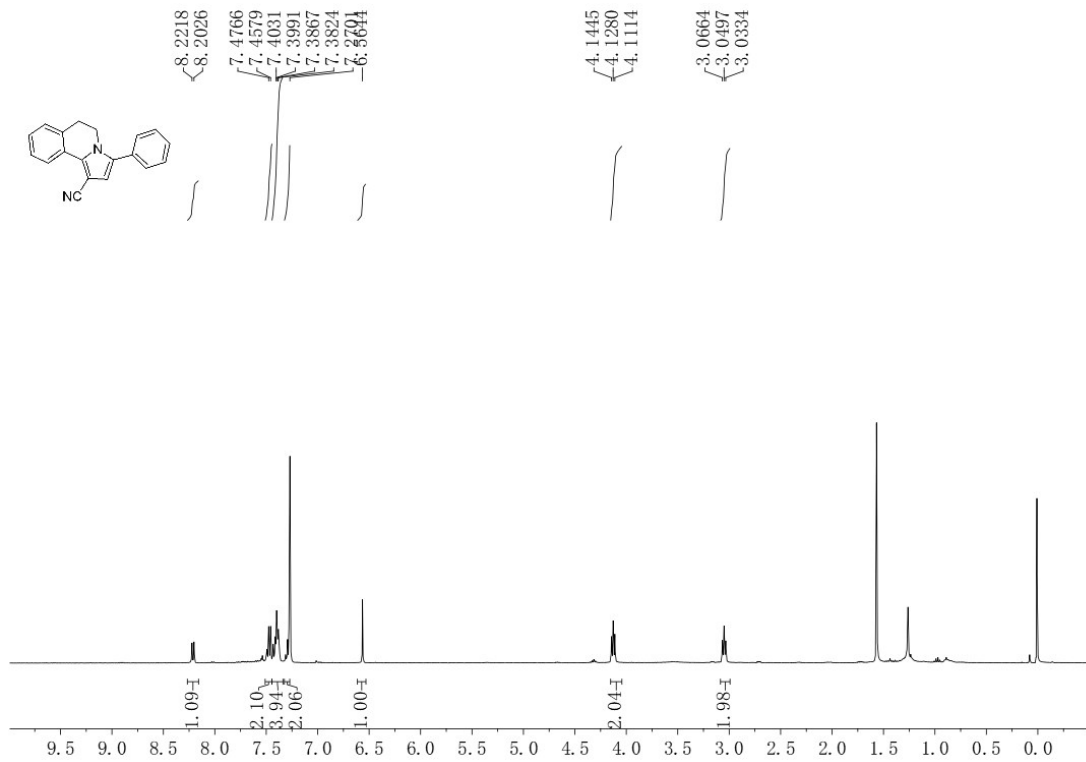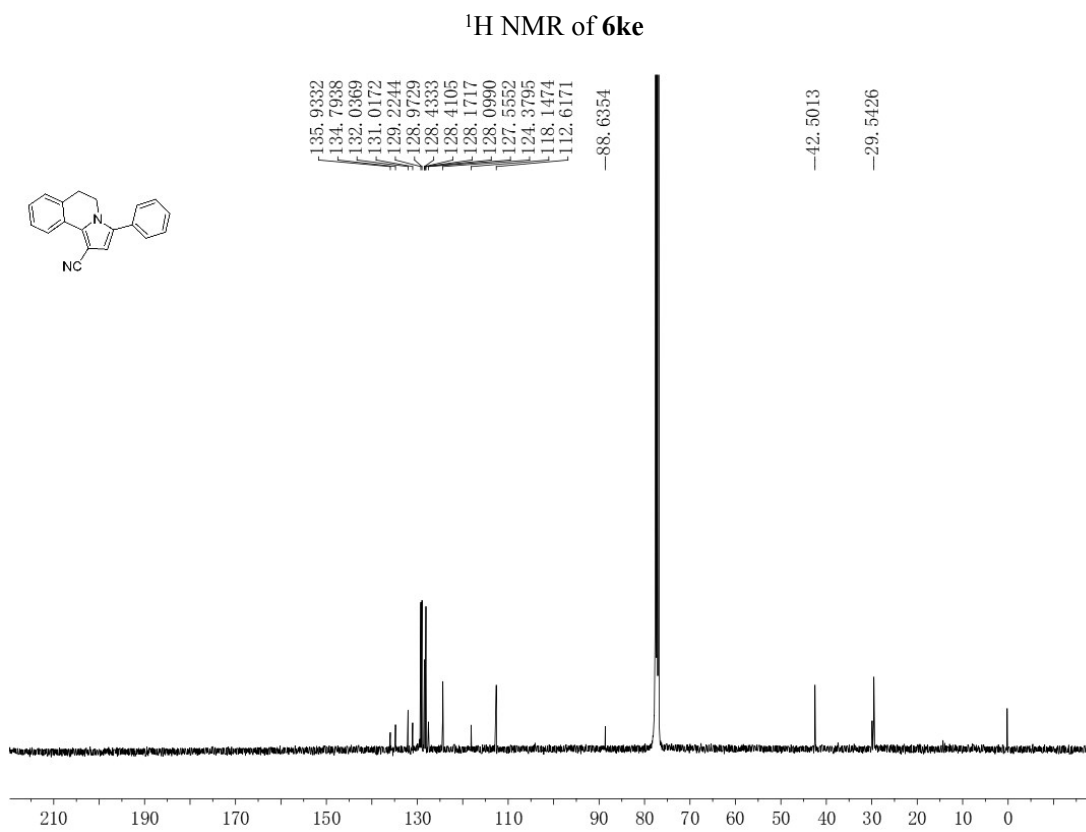

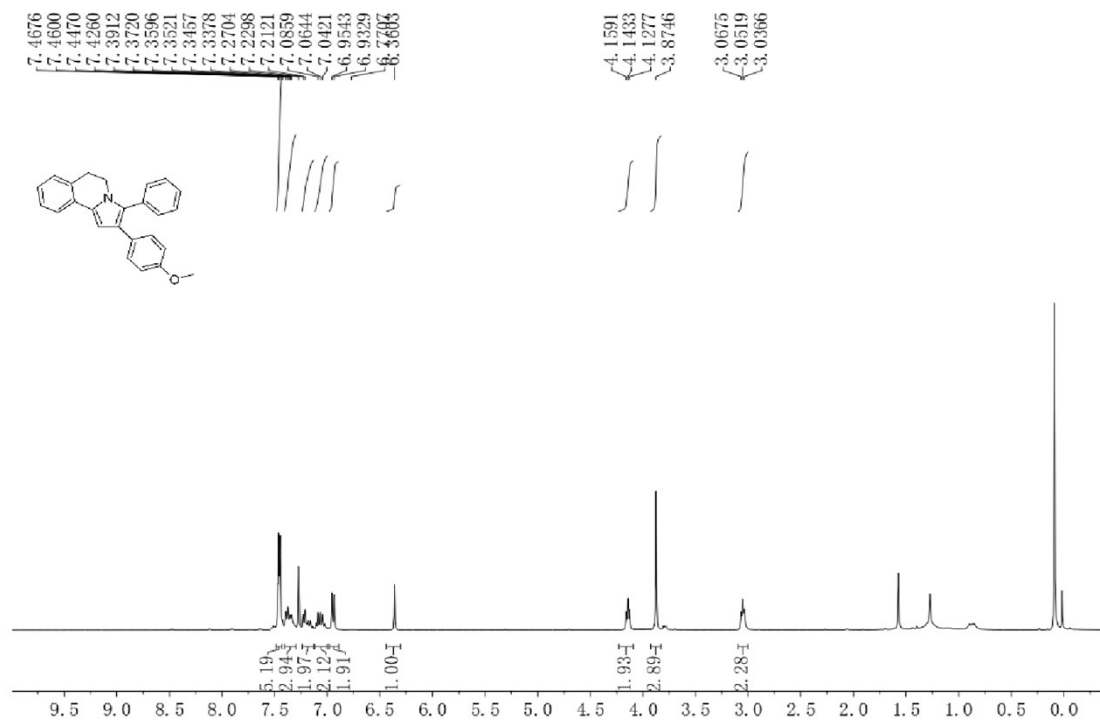

<sup>1</sup>H NMR of 6kf

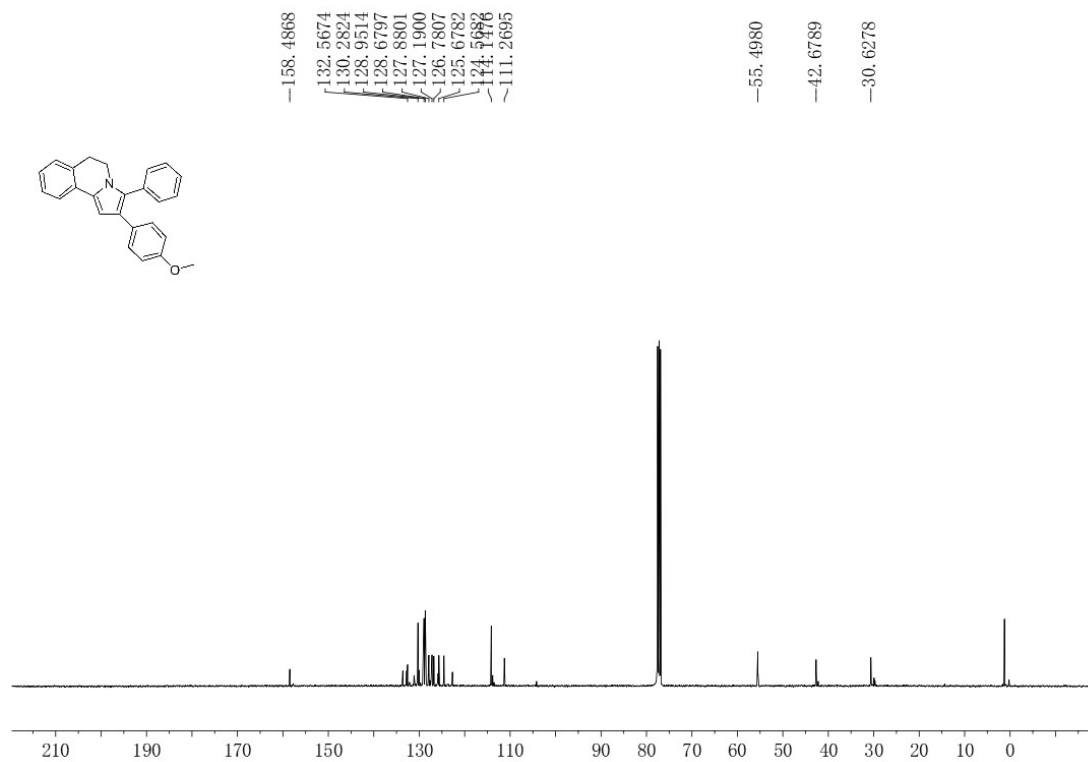

<sup>13</sup>C NMR of 6kf

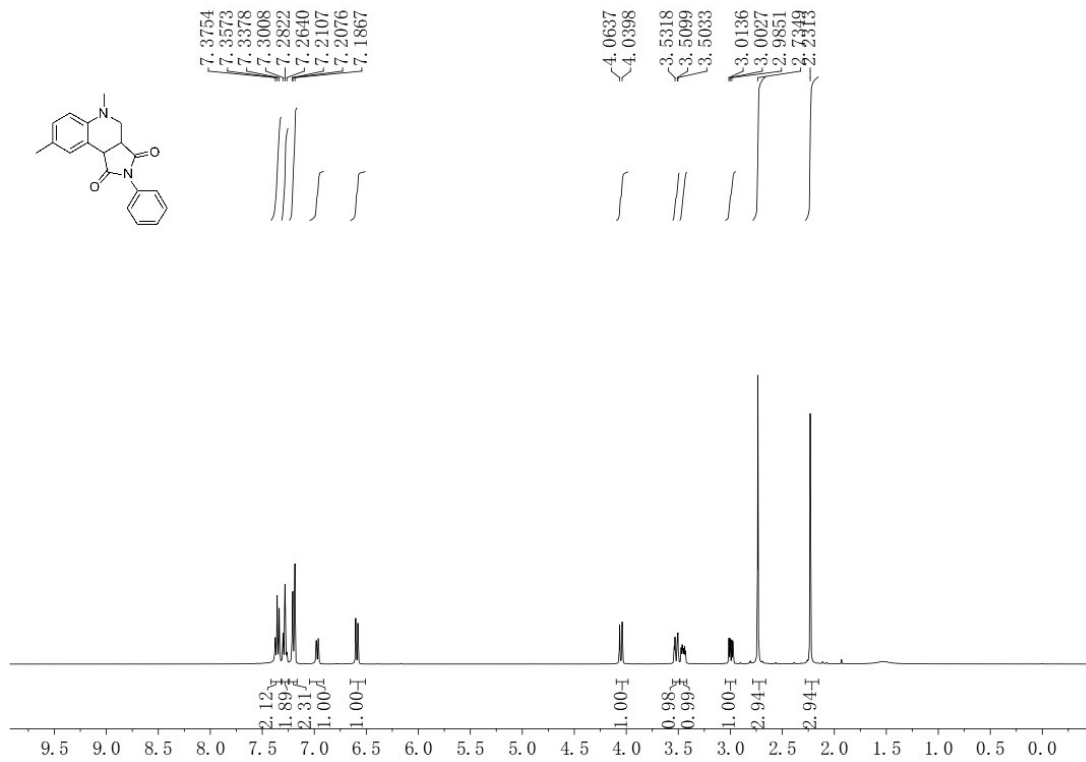

**<sup>1</sup>H NMR of 8a**

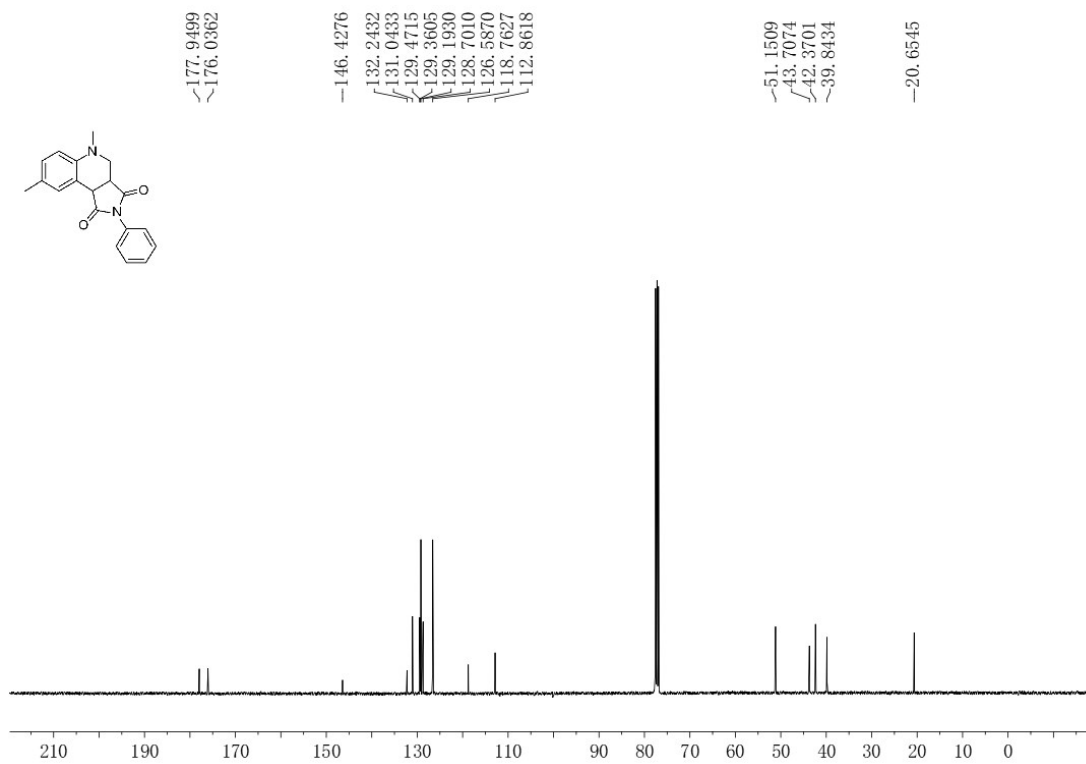

**<sup>13</sup>C NMR of 8a**

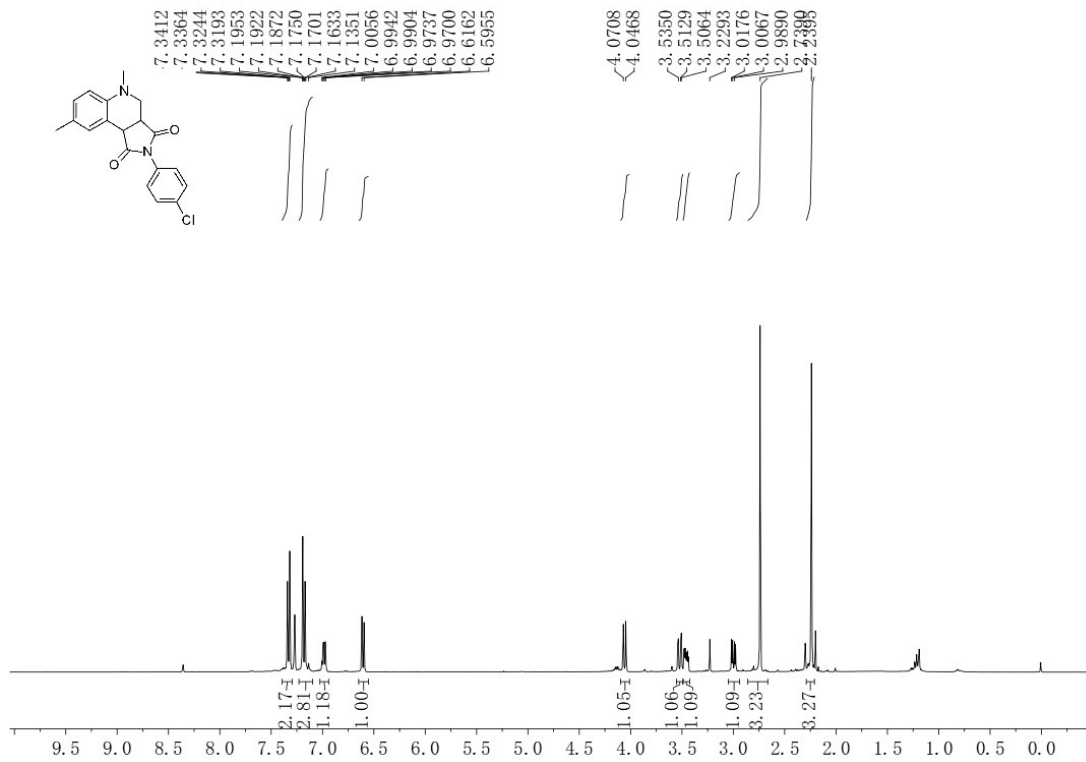

**<sup>1</sup>H NMR of 8b**

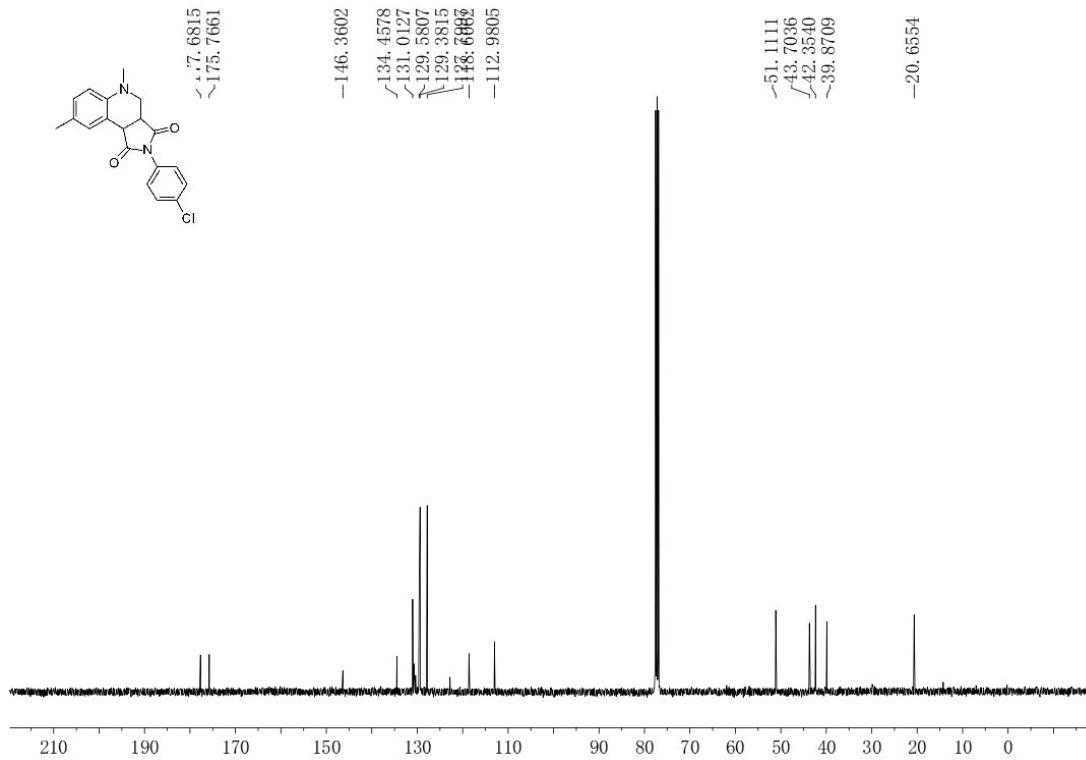

**<sup>13</sup>C NMR of 8b**

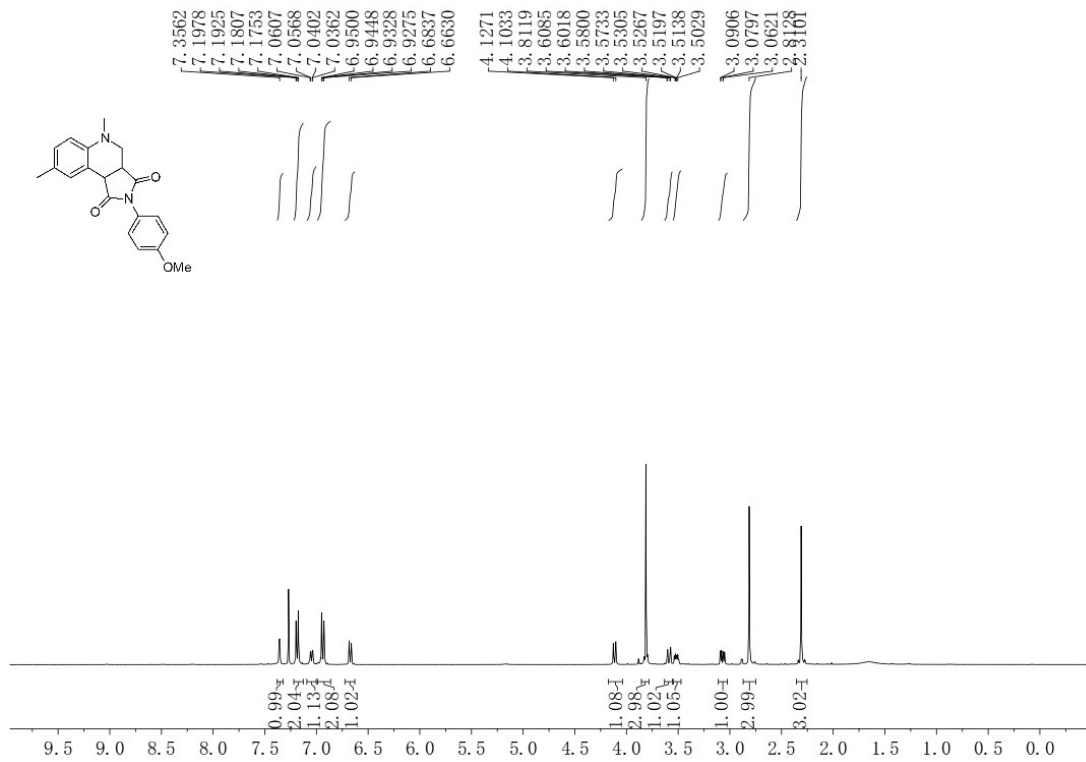

$^1\text{H}$  NMR of **8c**

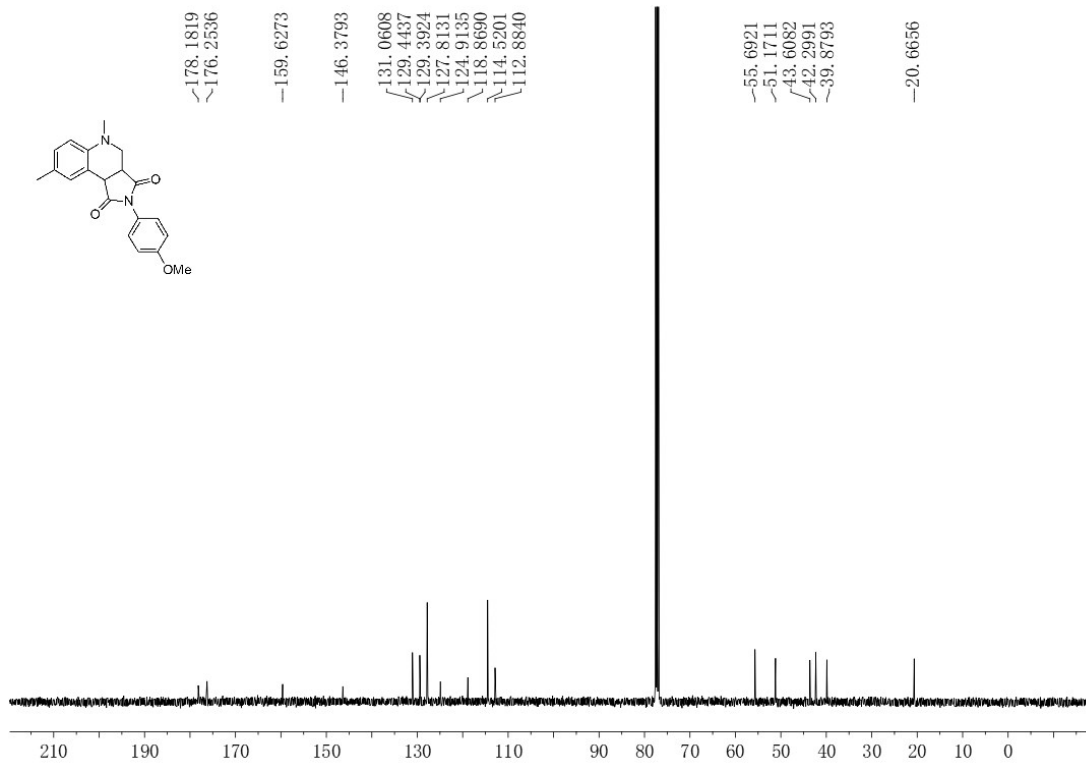

$^{13}\text{C}$  NMR of **8c**

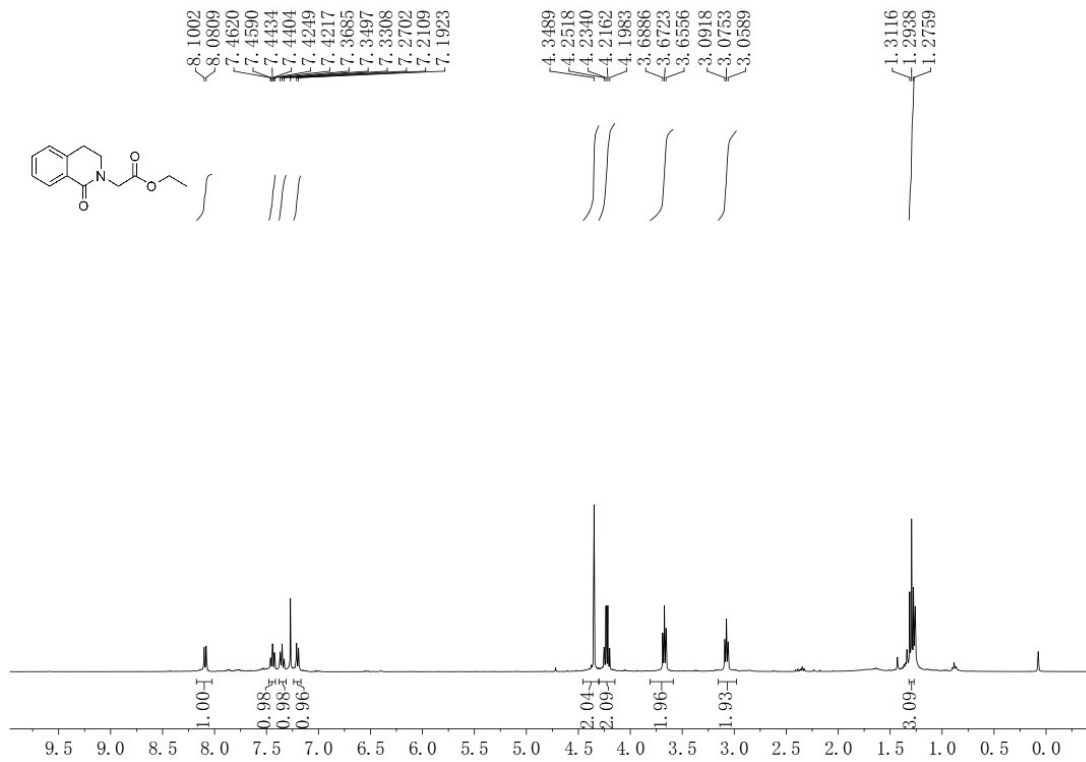

$^1\text{H}$  NMR of **9**

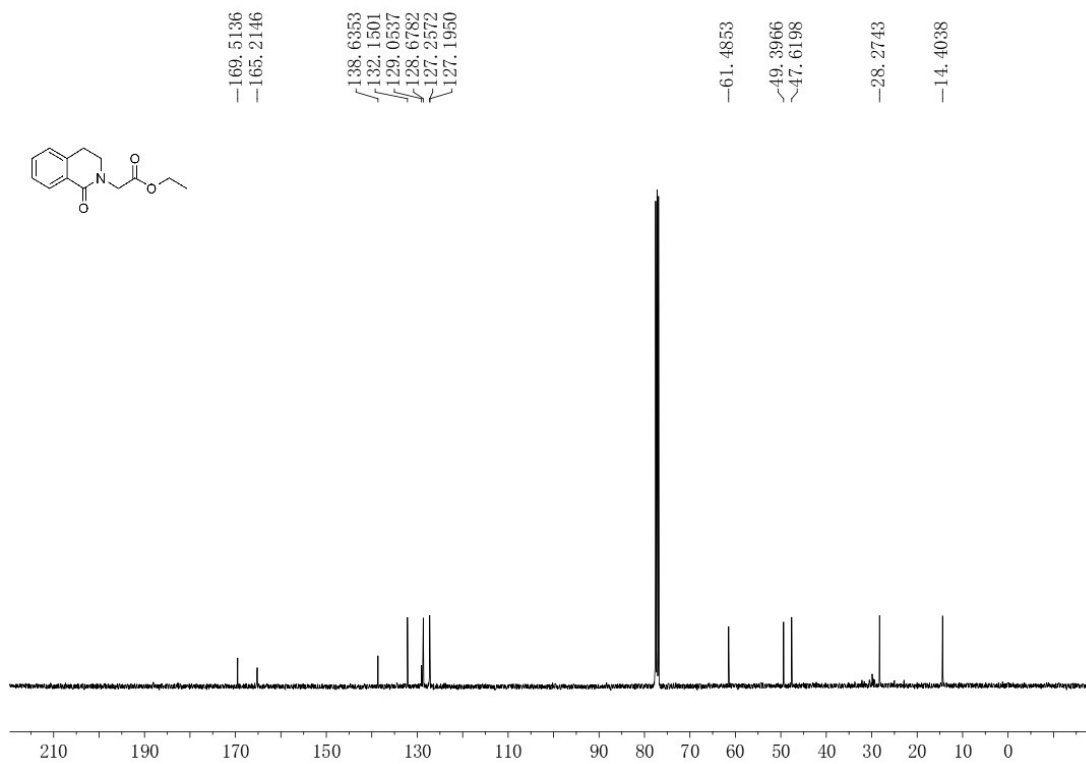

$^{13}\text{C}$  NMR of **9**
